# Supplementary material for: Comparative Genomics of Streptococcus thermophilus Support Important Traits Concerning the Evolution, Biology and Technological Properties of the Species
Source: Front Microbiol. 2019 Dec 20;10:2916. doi: 10.3389/fmicb.2019.02916 (PMC6951406; doi:10.3389/fmicb.2019.02916)
Supplement: Supplementary file 5 [file Table_5.XLSX]

## Sheet: Table S5A
Supplementary Table S5A. Genes involved in proteolysis identified in the 23 S. thermophilus strains. Genes highlighted in blue are truncated
product	gene	ACA-DC 2	APC151	ASCC 1275	B59671	CNRZ1066	CS8	DGCC 7710	EPS	GABA	JIM 8232	KLDS 3.1003	KLDS SM	LMD-9	LMG 18311	MN-BM-A01	MN-BM-A02	MN-ZLW-002	NCTC12958	ND03	ND07	S9	SMQ-301	ST3
Aminopetidase A / Glutamyl aminopeptidase	pepA	STACADC2_RS08405	B1761_RS04700	T303_RS00190	CG712_RS05205	STR_RS08685	BAY21_RS05670	CW339_RS08905	CR922_RS08845	CR921_RS08910	STH8232_RS09155	BEN15_RS02180	A9497_RS05110	STER_RS08925	STU_RS18080	AMD33_RS07785	MNA02_RS08805	Y1U_RS08800	DQL34_RS10270	STND_RS08790	BBD27_RS05235	AVT04_RS05825	SMQ301_RS08915	BGL51_RS09005
Aminopeptidase C	pepC	STACADC2_RS01215	B1761_RS06920	T303_RS02310	CG712_RS07285	STR_RS01315	BAY21_RS03595	CW339_RS01180	CR922_RS08155	CR921_RS01255	STH8232_RS01425	BEN15_RS04300	A9497_RS07295	STER_RS01340	STU_RS10780	AMD33_RS00200	MNA02_RS01220	Y1U_RS01245	DQL34_RS01565	STND_RS01280	BBD27_RS03130	AVT04_RS03675	SMQ301_RS01355	BGL51_RS01300
Oligoendopeptidase F	pepF	STACADC2_RS02300	B1761_RS08050	T303_RS03355	CG712_RS08340	STR_RS02365	BAY21_RS02540	CW339_RS02250	CR922_RS07085	CR921_RS02365	STH8232_RS02475	BEN15_RS05450	A9497_RS08360	STER_RS02405	STU_RS11845	AMD33_RS01300	MNA02_RS02275	Y1U_RS02340	DQL34_RS02640	STND_RS02395	BBD27_RS02075	AVT04_RS02620	SMQ301_RS02415	BGL51_RS02360
Methionine aminopeptidase	pepM	STACADC2_RS07005	B1761_RS03275	T303_RS08470	CG712_RS03795	STR_RS07300	BAY21_RS07070	CW339_RS07475	CR922_RS02065	CR921_RS07560	STH8232_RS07695	BEN15_RS00815	A9497_RS03680	STER_RS07460	STU_RS16650	AMD33_RS06370	MNA02_RS07375	Y1U_RS07390	DQL34_RS08520	STND_RS07380	BBD27_RS06670	AVT04_RS07230	SMQ301_RS07445	BGL51_RS07665
Aminopeptidase N	pepN	STACADC2_RS04765	B1761_RS00725	T303_RS05990	CG712_RS01295	STR_RS04900	BAY21_RS00035	CW339_RS04960	CR922_RS04525	CR921_RS04995	STH8232_RS05260	BEN15_RS08185	A9497_RS01225	STER_RS04990	STU_RS14255	AMD33_RS03580	MNA02_RS04900	Y1U_RS04595	DQL34_RS05965	STND_RS04845	BBD27_RS09125	AVT04_RS00145	SMQ301_RS04970	BGL51_RS05195
Endopeptidase	pepO	STACADC2_RS08575	B1761_RS04875	T303_RS00365	CG712_RS05370	STR_RS08855	BAY21_RS05500	CW339_RS09080	CR922_RS09015	CR921_RS09085	STH8232_RS09330	BEN15_RS02350	A9497_RS05285	STER_RS09100	STU_RS18250	AMD33_RS07955	MNA02_RS08980	Y1U_RS08965	DQL34_RS10420	STND_RS08965	BBD27_RS05060	AVT04_RS05655	SMQ301_RS09085	BGL51_RS09180
Aminopeptidase P family protein	pepP	STACADC2_RS07875	B1761_RS04160	T303_RS09350	CG712_RS04675	STR_RS08155	BAY21_RS06210	CW339_RS08370	CR922_RS01170	CR921_RS08385	STH8232_RS08615	BEN15_RS01645	A9497_RS04560	STER_RS08390	STU_RS17535	AMD33_RS07235	MNA02_RS08260	Y1U_RS08255	DQL34_RS09600	STND_RS08240	BBD27_RS05785	AVT04_RS06365	SMQ301_RS08380	BGL51_RS08495
Prolidase / Dipeptidase	pepQ	STACADC2_RS03170	B1761_RS08940	T303_RS04280	CG712_RS09210	STR_RS03225	BAY21_RS01690	CW339_RS03215	CR922_RS06235	CR921_RS03320	STH8232_RS03605	BEN15_RS06310	A9497_RS09300	STER_RS03340	STU_RS12700	AMD33_RS02155	MNA02_RS03200	Y1U_RS03200	DQL34_RS03855	STND_RS03275	BBD27_RS01130	AVT04_RS01770	SMQ301_RS03320	BGL51_RS03305
Aminopeptidase PepS	pepS	STACADC2_RS00455	B1761_RS06085	T303_RS01565	CG712_RS06485	STR_RS00475	BAY21_RS04365	CW339_RS00450	CR922_RS00455	CR921_RS00460	STH8232_RS00515	BEN15_RS03530	A9497_RS06485	STER_RS00485	STU_RS09945	AMD33_RS09155	MNA02_RS00475	Y1U_RS00480	DQL34_RS00530	STND_RS00515	BBD27_RS03865	AVT04_RS04525	SMQ301_RS00490	BGL51_RS00455
Peptidase T (tripeptidase)	pepT	STACADC2_RS05180	B1761_RS01195	T303_RS06455	CG712_RS01920	STR_RS05370	BAY21_RS08990	CW339_RS05450	CR922_RS04045	CR921_RS05430	STH8232_RS05715	BEN15_RS08675	A9497_RS01685	STER_RS05425	STU_RS14765	AMD33_RS03075	MNA02_RS05360	Y1U_RS04110	DQL34_RS06395	STND_RS05310	BBD27_RS08665	AVT04_RS09145	SMQ301_RS05420	BGL51_RS05640
Dipeptidase PepV	pepV	STACADC2_RS05125	B1761_RS01140	T303_RS06405	CG712_RS01865	STR_RS05315	BAY21_RS09040	CW339_RS05395	CR922_RS04100	CR921_RS05375	STH8232_RS05660	BEN15_RS08625	A9497_RS01640	STER_RS05375	STU_RS14710	AMD33_RS03130	MNA02_RS05310	Y1U_RS04165	DQL34_RS06340	STND_RS05255	BBD27_RS08715	AVT04_RS09200	SMQ301_RS05370	BGL51_RS05585
Xaa-Pro dipeptidyl-peptidase	pepX	STACADC2_RS07555	B1761_RS03840	T303_RS09015	CG712_RS04370	STR_RS07875	BAY21_RS06495	CW339_RS08040	CR922_RS01465	CR921_RS08150	STH8232_RS08280	BEN15_RS01405	A9497_RS04230	STER_RS08015	STU_RS17225	AMD33_RS06920	MNA02_RS07925	Y1U_RS07935	DQL34_RS09235	STND_RS07925	BBD27_RS06115	AVT04_RS06655	SMQ301_RS08005	BGL51_RS08255
peptidase S51	-	-	-	-	-	-	-	-	-	-	STH8232_RS00675	-	-	-	-	-	-	-	-	-	-	-	-	-
cell-wall associated proteinase / serine protease	prtS	-	-	T303_RS05160	-	-	-	CW339_RS04105	-	CR921_RS04045	STH8232_RS04360	-	A9497_RS00420	STER_RS04165	-	AMD33_RS04405	MNA02_RS04075	Y1U_RS05420	-	-	BBD27_RS00265	-	SMQ301_RS04180	BGL51_RS04150

## Sheet: Table S5B
Supplamentary Table S5B. Genes involved in transport of peptides and amino acids identified in the 23 S. thermophilus strains. Genes highlighted in red correspond to putative pseudogenes while genes highlighted in blue are truncated
Transporter family	product		gene	ACA-DC 2	APC151	ASCC 1275	B59671	CNRZ1066	CS8	DGCC 7710	EPS	GABA	JIM 8232	KLDS 3.1003	KLDS SM	LMD-9	LMG 18311	MN-BM-A01	MN-BM-A02	MN-ZLW-002	NCTC12958	ND03	ND07	S9	SMQ-301	ST3
ATP-binding Cassette (ABC)	oligopeptide opp ABC transporter	Oligopeptide transport ATP-binding protein OppF	OppF	STACADC2_RS06495	B1761_RS02725	T303_RS07925	CG712_RS03285	STR_RS06760	BAY21_RS07600	CW339_RS06950	CR922_RS02625	CR921_RS07000	STH8232_RS07180	BEN15_RS00250	A9497_RS03140	STER_RS06910	STU_RS16110	AMD33_RS05835	MNA02_RS06830	Y1U_RS06850	DQL34_RS07995	STND_RS06810	BBD27_RS07210	AVT04_RS07760	SMQ301_RS06895	BGL51_RS07110
		Oligopeptide transport ATP-binding protein OppD	OppD	STACADC2_RS06500	B1761_RS02730	T303_RS07930	CG712_RS03290	STR_RS06765	BAY21_RS07595	CW339_RS06955	CR922_RS02620	CR921_RS07005	STH8232_RS07185	BEN15_RS00255	A9497_RS03145	STER_RS06915	STU_RS16115	AMD33_RS05840	MNA02_RS06835	Y1U_RS06855	DQL34_RS08000	STND_RS06815	BBD27_RS07205	AVT04_RS07755	SMQ301_RS06900	BGL51_RS07115
		Oligopeptide transport system permease protein OppC	OppC	STACADC2_RS06505	B1761_RS02735	T303_RS07935	CG712_RS03295	STR_RS06770	BAY21_RS07590	CW339_RS06960	CR922_RS02615	CR921_RS07010	STH8232_RS07190	BEN15_RS00260	A9497_RS03150	STER_RS06920	STU_RS16120	AMD33_RS05845	MNA02_RS06840	Y1U_RS06860	DQL34_RS08005	STND_RS06820	BBD27_RS07200	AVT04_RS07750	SMQ301_RS06905	BGL51_RS07120
		Oligopeptide transport system permease protein OppB	OppB	STACADC2_RS06510	B1761_RS02740	T303_RS07940	CG712_RS03300	STR_RS06775	BAY21_RS07585	CW339_RS06965	CR922_RS02610	CR921_RS07015	STH8232_RS07195	BEN15_RS00265	A9497_RS03155	STER_RS06925	STU_RS16125	AMD33_RS05850	MNA02_RS06845	Y1U_RS06865	DQL34_RS08010	STND_RS06825	BBD27_RS07195	AVT04_RS07745	SMQ301_RS06910	BGL51_RS07125
		Oligopeptide ABC transporter, periplasmic oligopeptide-binding protein OppA	OppA	STACADC2_RS06515	B1761_RS02745	T303_RS07945	CG712_RS03305	STR_RS06780	BAY21_RS07580	CW339_RS06970	CR922_RS02605	CR921_RS07020	STH8232_RS07200	BEN15_RS00270	A9497_RS03160	STER_RS06930	STU_RS16130	AMD33_RS05855	MNA02_RS06850	Y1U_RS06870	-	STND_RS06830	BBD27_RS07190	AVT04_RS07740	SMQ301_RS06915	BGL51_RS07130
		Oligopeptide ABC transporter, periplasmic oligopeptide-binding protein OppA	OppA	STACADC2_RS06525	B1761_RS02755	T303_RS07955	CG712_RS06835	STR_RS06790	BAY21_RS07575	CW339_RS06980	CR922_RS02595	CR921_RS07030	STH8232_RS07210	BEN15_RS00280	A9497_RS03170	STER_RS06940	STU_RS16140	AMD33_RS05865	MNA02_RS06860	Y1U_RS06880	DQL34_RS08015	STND_RS06845	BBD27_RS07180	AVT04_RS07730	SMQ301_RS06925	BGL51_RS07140
ATP-binding Cassette (ABC)	oligopeptide opp ABC transporter	peptide ABC transporter substrate-binding protein	OppA	-	-	-	-	-	-	-	-	-	-	-	-	STER_RS00685	-	-	-	-	-	-	-	-	SMQ301_RS00690	BGL51_RS00655
		ABC transporter permease	OppB	-	-	-	-	-	-	-	-	-	-	-	-	STER_RS00690	-	-	-	-	-	-	-	-	SMQ301_RS00695	BGL51_RS00660
		ABC transporter permease	OppC	-	-	-	-	-	-	-	-	-	-	-	-	STER_RS00695	-	-	-	-	-	-	-	-	SMQ301_RS00700	BGL51_RS00665
		ABC transporter ATP-binding protein	OppD	-	-	-	-	-	-	-	-	-	-	-	-	STER_RS00700	-	-	-	-	-	-	-	-	SMQ301_RS00705	BGL51_RS00670
ATP-binding Cassette (ABC)	branched-chain amino acids ABC transporter	branched-chain amino acid ABC transporter substrate-binding protein	livK	STACADC2_RS01820	B1761_RS07535	T303_RS02910	CG712_RS07855	STR_RS01880	BAY21_RS03020	CW339_RS01795	CR922_RS07565	CR921_RS01860	STH8232_RS02020	BEN15_RS04920	A9497_RS07905	STER_RS01940	STU_RS11380	AMD33_RS00800	MNA02_RS01820	Y1U_RS01845	DQL34_RS02190	STND_RS01880	BBD27_RS02530	AVT04_RS03100	SMQ301_RS01955	BGL51_RS01915
		branched-chain amino acid ABC transporter permease	livH	STACADC2_RS01825	B1761_RS07540	T303_RS02915	CG712_RS07860	STR_RS01885	BAY21_RS03015	CW339_RS01800	CR922_RS07560	CR921_RS01865	STH8232_RS02025	BEN15_RS04925	A9497_RS07910	STER_RS01945	STU_RS11385	AMD33_RS00805	MNA02_RS01825	Y1U_RS01850	DQL34_RS02195	STND_RS01885	BBD27_RS02525	AVT04_RS03095	SMQ301_RS01960	BGL51_RS01920
		branched-chain amino acid ABC transporter permease	livM	STACADC2_RS01830	B1761_RS07545	T303_RS02920	CG712_RS07865	STR_RS01890	BAY21_RS03010	CW339_RS01805	CR922_RS07555	CR921_RS01870	STH8232_RS02030	BEN15_RS04930	A9497_RS07915	STER_RS01950	STU_RS11390	AMD33_RS00810	MNA02_RS01830	Y1U_RS01855	DQL34_RS02200	STND_RS01890	BBD27_RS02520	AVT04_RS03090	SMQ301_RS01965	BGL51_RS01925
		ABC transporter ATP-binding protein	livG	STACADC2_RS01835	B1761_RS07550	T303_RS02925	CG712_RS07870	STR_RS01895	BAY21_RS03005	CW339_RS01810	CR922_RS07550	CR921_RS01875	STH8232_RS02035	BEN15_RS04935	A9497_RS07920	STER_RS01955	STU_RS11395	AMD33_RS00815	MNA02_RS01835	Y1U_RS01860	DQL34_RS02205	STND_RS01895	BBD27_RS02515	AVT04_RS03085	SMQ301_RS01970	BGL51_RS01930
		ABC transporter ATP-binding protein	livF	STACADC2_RS01840	B1761_RS07555	T303_RS02930	CG712_RS07875	STR_RS01900	BAY21_RS03000	CW339_RS01815	CR922_RS07545	CR921_RS01880	STH8232_RS02040	BEN15_RS04940	A9497_RS07925	STER_RS01960	STU_RS11400	AMD33_RS00820	MNA02_RS01840	Y1U_RS01865	DQL34_RS02210	STND_RS01900	BBD27_RS02510	AVT04_RS03080	SMQ301_RS01975	BGL51_RS01935
ATP-binding Cassette (ABC)	glutamine ABC transporter	amino acid ABC transporter permease	-	STACADC2_RS06745	B1761_RS03005	T303_RS08195	CG712_RS03540	STR_RS07025	BAY21_RS07345	CW339_RS07205	CR922_RS02360	CR921_RS07285	STH8232_RS07440	BEN15_RS00540	A9497_RS03405	STER_RS07190	STU_RS16365	AMD33_RS06095	MNA02_RS07100	Y1U_RS07115	DQL34_RS08250	STND_RS07105	BBD27_RS06945	AVT04_RS07500	SMQ301_RS07175	BGL51_RS07390
		amino acid ABC transporter ATP-binding protein	-	STACADC2_RS06750	B1761_RS03010	T303_RS08200	CG712_RS03545	STR_RS07030	BAY21_RS07340	CW339_RS07210	CR922_RS02355	CR921_RS07290	STH8232_RS07445	BEN15_RS00545	A9497_RS03410	STER_RS07195	STU_RS16370	AMD33_RS06100	MNA02_RS07105	Y1U_RS07120	DQL34_RS08255	STND_RS07110	BBD27_RS06940	AVT04_RS07495	SMQ301_RS07180	BGL51_RS07395
ATP-binding Cassette (ABC)	polar amino acid ABC transporter	amino acid ABC transporter permease	-	STACADC2_RS04190	B1761_RS00130	T303_RS05485	CG712_RS00755	STR_RS04350	BAY21_RS00585	CW339_RS04425	CR922_RS05090	CR921_RS04370	STH8232_RS04670	BEN15_RS07610	A9497_RS00720	STER_RS04480	STU_RS13695	AMD33_RS04100	MNA02_RS04395	Y1U_RS05115	DQL34_RS05475	STND_RS04320	BBD27_RS09630	AVT04_RS00705	SMQ301_RS04460	BGL51_RS04545
		amino acid ABC transporter ATP-binding protein	-	STACADC2_RS04195	B1761_RS00135	T303_RS05490	CG712_RS00760	STR_RS04355	BAY21_RS00580	CW339_RS04430	CR922_RS05085	CR921_RS04375	STH8232_RS04675	BEN15_RS07615	A9497_RS00725	STER_RS04485	STU_RS13700	AMD33_RS04095	MNA02_RS04400	Y1U_RS05110	DQL34_RS05480	STND_RS04325	BBD27_RS09625	AVT04_RS00700	SMQ301_RS04465	BGL51_RS04550
		amino acid ABC transporter substrate-binding protein	-	STACADC2_RS04200	B1761_RS00140	T303_RS05495	CG712_RS00765	STR_RS04360	BAY21_RS00575	CW339_RS04435	CR922_RS05080	CR921_RS04380	STH8232_RS04680	BEN15_RS07620	A9497_RS00730	STER_RS04490	STU_RS13705	AMD33_RS04090	MNA02_RS04405	Y1U_RS05105	DQL34_RS05485	STND_RS04330	BBD27_RS09620	AVT04_RS00695	SMQ301_RS04470	BGL51_RS04555
ATP-binding Cassette (ABC)	polar amino acid (cysteine) ABC transporter	amino acid ABC transporter substrate-binding protein	-	STACADC2_RS07115	B1761_RS03385	T303_RS08575	CG712_RS03905	STR_RS07410	BAY21_RS06960	CW339_RS07580	CR922_RS01955	CR921_RS07665	STH8232_RS07840	BEN15_RS00910	A9497_RS03785	STER_RS07565	STU_RS16760	AMD33_RS06475	MNA02_RS07480	Y1U_RS07495	DQL34_RS08625	STND_RS07485	BBD27_RS06560	AVT04_RS07120	SMQ301_RS07550	BGL51_RS07775
		amino acid ABC transporter ATP-binding protein	-	STACADC2_RS07120	B1761_RS03390	T303_RS08580	CG712_RS03910	STR_RS07415	BAY21_RS06955	CW339_RS07585	CR922_RS01950	CR921_RS07670	STH8232_RS07845	BEN15_RS00915	A9497_RS03790	STER_RS07570	STU_RS16765	AMD33_RS06480	MNA02_RS07485	Y1U_RS07500	DQL34_RS08630	STND_RS07490	BBD27_RS06555	AVT04_RS07115	SMQ301_RS07555	BGL51_RS07780
		amino acid ABC transporter permease	-	STACADC2_RS07125	B1761_RS03395	T303_RS08585	CG712_RS03915	STR_RS07420	BAY21_RS06950	CW339_RS07590	CR922_RS01945	CR921_RS07675	STH8232_RS07850	BEN15_RS00920	A9497_RS03795	STER_RS07575	STU_RS16770	AMD33_RS06485	MNA02_RS07490	Y1U_RS07505	DQL34_RS08635	STND_RS07495	BBD27_RS06550	AVT04_RS07110	SMQ301_RS07560	BGL51_RS07785
		amino acid ABC transporter permease	-	STACADC2_RS07130	B1761_RS03400	T303_RS08590	CG712_RS03920	STR_RS07425	BAY21_RS06945	CW339_RS07595	CR922_RS01940	CR921_RS07680	STH8232_RS07855	BEN15_RS00925	A9497_RS03800	STER_RS07580	STU_RS16775	AMD33_RS06490	MNA02_RS07495	Y1U_RS07510	DQL34_RS08640	STND_RS07500	BBD27_RS06545	AVT04_RS07105	SMQ301_RS07565	BGL51_RS07790
ATP-binding Cassette (ABC)	polar amino acid ABC transporter	amino acid ABC transporter ATP-binding protein	-	STACADC2_RS07485	B1761_RS03755	T303_RS08935	CG712_RS04275	STR_RS07770	BAY21_RS06600	CW339_RS07955	CR922_RS01580	CR921_RS08060	STH8232_RS08200	BEN15_RS01310	A9497_RS04145	STER_RS07935	STU_RS17120	AMD33_RS06835	MNA02_RS07840	Y1U_RS07855	DQL34_RS09085	STND_RS07845	BBD27_RS06200	AVT04_RS06760	SMQ301_RS07920	BGL51_RS08155
		amino acid ABC transporter permease	-	STACADC2_RS07490	B1761_RS03760	T303_RS08940	CG712_RS04280	STR_RS07775	BAY21_RS06595	CW339_RS07960	CR922_RS01575	CR921_RS08065	STH8232_RS08205	BEN15_RS01315	A9497_RS04150	STER_RS07940	STU_RS17125	AMD33_RS06840	MNA02_RS07845	Y1U_RS07860	DQL34_RS09090	STND_RS07850	BBD27_RS06195	AVT04_RS06755	SMQ301_RS07925	BGL51_RS08160
		amino acid ABC transporter substrate-binding protein	-	STACADC2_RS07495	B1761_RS03765	T303_RS08945	CG712_RS04285	STR_RS07780	BAY21_RS06590	CW339_RS07965	CR922_RS01570	CR921_RS08070	STH8232_RS08210	BEN15_RS01320	A9497_RS04155	STER_RS07945	STU_RS17130	AMD33_RS06845	MNA02_RS07850	Y1U_RS07865	DQL34_RS09095	STND_RS07855	BBD27_RS06190	AVT04_RS06750	SMQ301_RS07930	BGL51_RS08165
ATP-binding Cassette (ABC)	amino acid ABC transporter	amino acid ABC transporter ATP-binding protein	-	STACADC2_RS05280	B1761_RS01295	T303_RS06555	CG712_RS02020	STR_RS05470	BAY21_RS08890	CW339_RS05550	CR922_RS03945	CR921_RS05530	STH8232_RS05815	BEN15_RS08795	A9497_RS01785	STER_RS05525	STU_RS14860	AMD33_RS02975	MNA02_RS05460	Y1U_RS04010	DQL34_RS06495	STND_RS05410	BBD27_RS08565	AVT04_RS09045	SMQ301_RS05520	BGL51_RS05745
		glutamine ABC transporter substrate-binding protein	-	STACADC2_RS05285	B1761_RS01300	T303_RS06560	CG712_RS02025	STR_RS05475	BAY21_RS08885	CW339_RS05555	CR922_RS03940	CR921_RS05535	STH8232_RS05820	BEN15_RS08800	A9497_RS01790	STER_RS05530	STU_RS14865	AMD33_RS02970	MNA02_RS05465	Y1U_RS04005	DQL34_RS06500	STND_RS05415	BBD27_RS08560	AVT04_RS09040	SMQ301_RS05525	BGL51_RS05750
		amino acid ABC transporter permease	-	STACADC2_RS05290	B1761_RS01305	T303_RS06565	CG712_RS02030	STR_RS05480	BAY21_RS08880	CW339_RS05560	CR922_RS03935	CR921_RS05540	STH8232_RS05825	BEN15_RS08805	A9497_RS01795	STER_RS05535	STU_RS14870	AMD33_RS02965	MNA02_RS05470	Y1U_RS04000	DQL34_RS06505	STND_RS05420	BBD27_RS08555	AVT04_RS09035	SMQ301_RS05530	BGL51_RS05755
		amino acid ABC transporter permease	-	STACADC2_RS05295	B1761_RS01310	T303_RS06570	CG712_RS02035	STR_RS05485	BAY21_RS08875	CW339_RS05565	CR922_RS03930	CR921_RS05545	STH8232_RS05830	BEN15_RS08810	A9497_RS01800	STER_RS05540	STU_RS14875	AMD33_RS02960	MNA02_RS05475	Y1U_RS03995	DQL34_RS06510	STND_RS05425	BBD27_RS08550	AVT04_RS09030	SMQ301_RS05535	BGL51_RS05760
ATP-binding Cassette (ABC)	polar amino acid ABC transporter	amino acid ABC transporter ATP-binding protein	-	-	-	-	CG712_RS02915	-	-	-	-	CR921_RS06545	-	-	-	-	-	-	-	-	DQL34_RS07505	-	-	-	-	-
		amino acid ABC transporter permease	-	-	-	-	CG712_RS02920	-	-	-	-	CR921_RS06550	-	-	-	-	-	-	-	-	DQL34_RS07510	-	-	-	-	-
		amino acid ABC transporter permease	-	-	-	-	CG712_RS02925	-	-	-	-	CR921_RS06555	-	-	-	-	-	-	-	-	DQL34_RS07515	-	-	-	-	-
		amino acid ABC transporter substrate-binding protein	-	-	-	-	CG712_RS02930	-	-	-	-	CR921_RS06560	-	-	-	-	-	-	-	-	DQL34_RS07520	-	-	-	-	-
ATP-binding Cassette (ABC)	amino acid ABC transporter	amino acid ABC transporter substrate-binding protein	-	-	-	-	-	STR_RS06350	BAY21_RS08010	-	CR922_RS03050	-	-	BEN15_RS09750	-	-	-	-	-	-	DQL34_RS07410	-	-	AVT04_RS08160	-	-
		amino acid ABC transporter ATP-binding protein	-	-	-	-	-	STR_RS06360	BAY21_RS08000	-	CR922_RS03040	-	-	BEN15_RS09760	-	-	-	-	-	-	DQL34_RS07420	-	-	AVT04_RS08150	-	-
		amino acid ABC transporter permease	-	-	-	-	-	STR_RS06365	BAY21_RS07995	-	CR922_RS03035	-	-	BEN15_RS09765	-	-	-	-	-	-	DQL34_RS07425	-	-	AVT04_RS08145	-	-
ATP-binding Cassette (ABC)	spermidine/putrescine ABC transporter	spermidine/putrescine ABC transporter, periplasmic binding protein PotD	potD	STACADC2_RS06890	B1761_RS03165	T303_RS08355	CG712_RS03680	STR_RS07185	BAY21_RS07180	CW339_RS07360	CR922_RS02180	CR921_RS07440	STH8232_RS07580	BEN15_RS00700	A9497_RS03570	STER_RS07345	STU_RS16535	AMD33_RS06255	MNA02_RS07260	Y1U_RS07275	DQL34_RS08405	STND_RS07265	BBD27_RS06780	AVT04_RS07340	SMQ301_RS07330	BGL51_RS07545
		spermidine/putrescine ABC transporter, permease component potC	potC	STACADC2_RS06895	B1761_RS03170	T303_RS08360	CG712_RS03685	STR_RS07190	BAY21_RS07175	CW339_RS07365	CR922_RS02175	CR921_RS07445	STH8232_RS07585	BEN15_RS00705	A9497_RS03575	STER_RS07350	STU_RS16540	AMD33_RS06260	MNA02_RS07265	Y1U_RS07280	DQL34_RS08410	STND_RS07270	BBD27_RS06775	AVT04_RS07335	SMQ301_RS07335	BGL51_RS07550
		spermidine/putrescine ABC transporter, permease component PotB	potB	STACADC2_RS06900	B1761_RS03175	T303_RS08365	CG712_RS03690	STR_RS07195	BAY21_RS07170	CW339_RS07370	CR922_RS02170	CR921_RS07450	STH8232_RS07590	BEN15_RS00710	A9497_RS03580	STER_RS07355	STU_RS16545	AMD33_RS06265	MNA02_RS07270	Y1U_RS07285	DQL34_RS08415	STND_RS07275	BBD27_RS06770	AVT04_RS07330	SMQ301_RS07340	BGL51_RS07555
		Putrescine transport ATP-binding protein PotA	potA	STACADC2_RS06905	B1761_RS03180	T303_RS08370	CG712_RS03695	STR_RS07200	BAY21_RS07165	CW339_RS07375	CR922_RS02165	CR921_RS07455	STH8232_RS07595	BEN15_RS00715	A9497_RS03585	STER_RS07360	STU_RS16550	AMD33_RS06270	MNA02_RS07275	Y1U_RS07290	DQL34_RS08420	STND_RS07280	BBD27_RS06765	AVT04_RS07325	SMQ301_RS07345	BGL51_RS07560
ATP-binding Cassette (ABC)	methionine ABC transporter	amino acid ABC transporter substrate protein	metQ	STACADC2_RS01535	B1761_RS07255	T303_RS02630	CG712_RS07575	STR_RS01610	BAY21_RS03290	CW339_RS01515	-	CR921_RS01575	STH8232_RS01740	BEN15_RS04625	A9497_RS07625	STER_RS01655	STU_RS11105	AMD33_RS00530	MNA02_RS01540	Y1U_RS01575	DQL34_RS01895	STND_RS01605	BBD27_RS02805	AVT04_RS03370	SMQ301_RS01670	BGL51_RS01635
		methionine import ATP-binding protein MetN	metN	STACADC2_RS01545	B1761_RS07265	T303_RS02640	CG712_RS07585	STR_RS01620	BAY21_RS03280	CW339_RS01525	CR922_RS07835	CR921_RS01585	STH8232_RS01750	BEN15_RS04635	A9497_RS07635	STER_RS01665	STU_RS11115	AMD33_RS00540	MNA02_RS01550	Y1U_RS01585	DQL34_RS01905	STND_RS01615	BBD27_RS02795	AVT04_RS03360	SMQ301_RS01680	BGL51_RS01645
		methionine ABC transporter permease	metP	STACADC2_RS01550	B1761_RS07270	T303_RS02645	CG712_RS07590	STR_RS01625	BAY21_RS03275	CW339_RS01530	CR922_RS07830	CR921_RS01590	STH8232_RS01755	BEN15_RS04640	A9497_RS07640	STER_RS01670	STU_RS11120	AMD33_RS00545	MNA02_RS01555	Y1U_RS01590	DQL34_RS01910	STND_RS01620	BBD27_RS02790	AVT04_RS03355	SMQ301_RS01685	BGL51_RS01650
Amino Acid-Polyamine-Organocation (APC)		amino acid permease (asparagine)	-	STACADC2_RS02555	B1761_RS08305	T303_RS03625	CG712_RS08600	STR_RS02620	BAY21_RS02285	CW339_RS02515	CR922_RS06835	CR921_RS02620	STH8232_RS02750	BEN15_RS05715	A9497_RS08630	STER_RS02670	STU_RS12105	AMD33_RS01560	MNA02_RS02545	Y1U_RS02600	DQL34_RS03055	STND_RS02655	BBD27_RS01805	AVT04_RS02365	SMQ301_RS02670	BGL51_RS02625
Amino Acid-Polyamine-Organocation (APC)		amino acid permease	-	STACADC2_RS02900	B1761_RS08680	T303_RS04035	CG712_RS08960	STR_RS02975	BAY21_RS01935	CW339_RS02955	CR922_RS06480	CR921_RS03075	STH8232_RS03370	BEN15_RS06060	A9497_RS09055	STER_RS03075	STU_RS12450	AMD33_RS01910	MNA02_RS02955	Y1U_RS02955	DQL34_RS03615	STND_RS03025	BBD27_RS01375	AVT04_RS02015	SMQ301_RS03060	BGL51_RS03050
Amino Acid-Polyamine-Organocation (APC)		amino acid permease	-	STACADC2_RS06145	B1761_RS02320	T303_RS07535	CG712_RS02895	STR_RS06425	BAY21_RS07935	CW339_RS06530	CR922_RS02970	CR921_RS06525	STH8232_RS06785	BEN15_RS09825	A9497_RS02760	STER_RS06510	STU_RS15775	AMD33_RS05455	MNA02_RS06440	Y1U_RS06465	DQL34_RS07480	STND_RS06425	BBD27_RS07580	AVT04_RS08085	SMQ301_RS06520	BGL51_RS06720
Amino Acid-Polyamine-Organocation (APC)		amino acid specific permease	-	STACADC2_RS06940	B1761_RS03215	T303_RS08405	CG712_RS03735	STR_RS07235	BAY21_RS07130	CW339_RS07410	CR922_RS02130	CR921_RS07490	STH8232_RS07630	BEN15_RS00750	A9497_RS03620	STER_RS07395	STU_RS16585	AMD33_RS06305	MNA02_RS07310	Y1U_RS07325	DQL34_RS08455	STND_RS07315	BBD27_RS06730	AVT04_RS07290	SMQ301_RS07380	BGL51_RS07595
Amino Acid-Polyamine-Organocation (APC)		amino acid permease (glutamate:GABA antiporter)	gadC	STACADC2_RS02050	B1761_RS07770	-	CG712_RS08085	-	-	-	-	CR921_RS02095	-	BEN15_RS05205	-	-	-	-	-	-	-	STND_RS02110	-	-	-	-
Amino Acid-Polyamine-Organocation (APC)		histidine:histamine antiporter	hdcP	-	-	-	-	-	-	-	-	-	-	BEN15_RS07915	-	-	-	-	-	-	-	-	-	-	-	-
Branched Chain Amino Acid Exporter (LIV-E)		branched-chain amino acid permease (AzlC)	-	STACADC2_RS08005	B1761_RS04290	T303_RS09480	CG712_RS04805	STR_RS08290	BAY21_RS06075	CW339_RS08500	CR922_RS01040	CR921_RS08515	STH8232_RS08745	BEN15_RS01775	A9497_RS04690	STER_RS08520	STU_RS17670	AMD33_RS07365	MNA02_RS08390	Y1U_RS08385	DQL34_RS09865	STND_RS08370	BBD27_RS05655	AVT04_RS06230	SMQ301_RS08510	BGL51_RS08620
Resistance to Homoserine/Threonine (RhtB)		LysE family translocator (amino acid efflux protein)	-	STACADC2_RS06245	B1761_RS02425	T303_RS07645	-	STR_RS06540	BAY21_RS07820	CW339_RS06640	CR922_RS02860	CR921_RS06700	STH8232_RS06895	BEN15_RS09935	A9497_RS02865	STER_RS06635	STU_RS15885	AMD33_RS05560	MNA02_RS06550	Y1U_RS06570	DQL34_RS04455	STND_RS06530	BBD27_RS07475	AVT04_RS07985	SMQ301_RS06620	BGL51_RS06845
Proton-dependent Oligopeptide Transporter (POT)	di-tripeptide transporter	peptide MFS transporter	dtpT	STACADC2_RS04610	B1761_RS00560	T303_RS05850	CG712_RS01150	STR_RS04745	BAY21_RS00190	CW339_RS04815	CR922_RS04685	CR921_RS04850	STH8232_RS05120	BEN15_RS08025	A9497_RS01085	STER_RS04850	STU_RS14105	AMD33_RS03735	MNA02_RS04760	Y1U_RS04750	DQL34_RS05825	STND_RS04690	BBD27_RS09265	AVT04_RS00295	SMQ301_RS04830	BGL51_RS05050
Branched Chain Amino Acid:Cation Symporter (LIVCS)	transporter (symporter)	branched-chain amino acid transport system II carrier protein	brnQ	STACADC2_RS06120	B1761_RS02290	T303_RS07515	CG712_RS02870	STR_RS06405	BAY21_RS07955	CW339_RS06505	CR922_RS02995	CR921_RS06500	STH8232_RS06765	BEN15_RS09805	A9497_RS02740	STER_RS06490	STU_RS15755	AMD33_RS05435	MNA02_RS06420	Y1U_RS06445	DQL34_RS07455	STND_RS06405	BBD27_RS07600	AVT04_RS08105	SMQ301_RS06500	BGL51_RS06700
Alanine or Glycine:Cation Symporter (AGCS)	transporter (symporter)	sodium:alanine symporter family protein	-	STACADC2_RS04660	B1761_RS00620	T303_RS05890	CG712_RS01190	STR_RS04800	BAY21_RS00135	CW339_RS04855	CR922_RS04630	CR921_RS04890	STH8232_RS05160	BEN15_RS08080	A9497_RS01125	STER_RS04890	STU_RS14155	AMD33_RS03680	MNA02_RS04800	Y1U_RS04695	DQL34_RS05865	STND_RS04745	BBD27_RS09225	AVT04_RS00245	SMQ301_RS04870	BGL51_RS05090
Dicarboxylate/Amino Acid:Cation (Na+ or H+) Symporter (DAACS)		Na+/serine-threonine symporter	sstT	STACADC2_RS01555	B1761_RS07275	T303_RS02650	CG712_RS07595	STR_RS01630	BAY21_RS03270	CW339_RS01535	CR922_RS07825	CR921_RS01595	STH8232_RS01760	BEN15_RS04645	A9497_RS07645	STER_RS01675	STU_RS11125	AMD33_RS00550	MNA02_RS01560	Y1U_RS01595	DQL34_RS01915	STND_RS01625	BBD27_RS02785	AVT04_RS03350	SMQ301_RS01690	BGL51_RS01655
Dicarboxylate/Amino Acid:Cation (Na+ or H+) Symporter (DAACS)		dicarboxylate/amino acid:cation symporter	-	-	B1761_RS04925	-	-	-	-	-	-	-	-	BEN15_RS01025	-	-	-	AMD33_RS08020	-	Y1U_RS09030	DQL34_RS08770	STND_RS09025	-	-	-	BGL51_RS09235
