# Supplementary material for: Comparative Genomics of Streptococcus thermophilus Support Important Traits Concerning the Evolution, Biology and Technological Properties of the Species
Source: Front Microbiol. 2019 Dec 20;10:2916. doi: 10.3389/fmicb.2019.02916 (PMC6951406; doi:10.3389/fmicb.2019.02916)
Supplement: Supplementary file 6 [file Table_6.XLSX]

## Sheet: TABLE S6
Supplementary Table S6. Genes involved in amino acid biosynthesis identified in the 23 S. thermophilus strains according to Kyoto Encyclopedia of Genes and Genomes (KEGG) database and Hols et al. (2005). Genes highlighted in red correspond to putative pseudogenes
amino acid	product	gene	ACA-DC 2	APC151	ASCC 1275	B59671	CNRZ1066	CS8	DGCC 7710	EPS	GABA	JIM 8232	KLDS 3.1003	KLDS SM	LMD-9	LMG 18311	MN-BM-A01	MN-BM-A02	MN-ZLW-002	NCTC12958	ND03	ND07	S9	SMQ-301	ST3
Serine biosynthesis	3-phosphoglycerate dehydrogenase	serA	STACADC2_RS06855	B1761_RS03130	T303_RS08320	CG712_RS03650	STR_RS07155	BAY21_RS07210	CW339_RS07330	CR922_RS02210	CR921_RS07410	STH8232_RS07545	BEN15_RS00670	A9497_RS03535	STER_RS07310	STU_RS16500	AMD33_RS06220	MNA02_RS07225	Y1U_RS07240	DQL34_RS08375	STND_RS07230	BBD27_RS06815	AVT04_RS07370	SMQ301_RS07295	BGL51_RS07515
	3-phosphoserine/phosphohydroxythreonine transaminase	serC	STACADC2_RS06865	B1761_RS03140	T303_RS08330	CG712_RS03660	STR_RS07165	BAY21_RS07200	CW339_RS07340	CR922_RS02200	CR921_RS07420	STH8232_RS07555	BEN15_RS00680	A9497_RS03545	STER_RS07320	STU_RS16510	AMD33_RS06230	MNA02_RS07235	Y1U_RS07250	DQL34_RS08385	STND_RS07240	BBD27_RS06805	AVT04_RS07360	SMQ301_RS07305	BGL51_RS07525
	phosphoserine phosphatase SerB	serB	STACADC2_RS06810	B1761_RS03085	T303_RS08275	CG712_RS03605	STR_RS07110	BAY21_RS07255	CW339_RS07285	CR922_RS02255	CR921_RS07365	STH8232_RS07500	BEN15_RS00625	A9497_RS03490	STER_RS07265	STU_RS16455	AMD33_RS06175	MNA02_RS07180	Y1U_RS07195	DQL34_RS08330	STND_RS07185	BBD27_RS06860	AVT04_RS07415	SMQ301_RS07250	BGL51_RS07470
Threonine biosynthesis	aspartate kinase	lysC	STACADC2_RS01955	B1761_RS07670	T303_RS03040	CG712_RS07990	STR_RS02025	BAY21_RS02875	CW339_RS01930	CR922_RS07425	CR921_RS01995	STH8232_RS02160	BEN15_RS05060	A9497_RS08045	STER_RS02080	STU_RS11520	AMD33_RS00945	MNA02_RS01960	Y1U_RS01985	DQL34_RS02330	STND_RS02020	BBD27_RS02390	AVT04_RS02955	SMQ301_RS02095	BGL51_RS02050
	aspartate-semialdehyde dehydrogenase	asd	STACADC2_RS05960	B1761_RS02100	T303_RS07315	CG712_RS02700	STR_RS06140	BAY21_RS08220	CW339_RS06305	CR922_RS03265	CR921_RS06300	STH8232_RS06600	BEN15_RS09555	A9497_RS02545	STER_RS06290	STU_RS15530	AMD33_RS05215	MNA02_RS06220	Y1U_RS06225	DQL34_RS07240	STND_RS06220	BBD27_RS07805	AVT04_RS08380	SMQ301_RS06300	BGL51_RS06490
	homoserine dehydrogenase	hom	STACADC2_RS02370	B1761_RS08125	T303_RS03430	CG712_RS08415	STR_RS02435	BAY21_RS02470	CW339_RS02330	CR922_RS07015	CR921_RS02440	STH8232_RS02555	BEN15_RS05525	A9497_RS08435	STER_RS02485	STU_RS11915	AMD33_RS01370	MNA02_RS02350	Y1U_RS02410	DQL34_RS02860	STND_RS02465	BBD27_RS02000	AVT04_RS02550	SMQ301_RS02485	BGL51_RS02435
	homoserine kinase	thrB	STACADC2_RS02375	B1761_RS08130	T303_RS03435	CG712_RS08420	STR_RS02440	BAY21_RS02465	CW339_RS02335	CR922_RS07010	CR921_RS02445	STH8232_RS02560	BEN15_RS05530	A9497_RS08440	STER_RS02490	STU_RS11920	AMD33_RS01375	MNA02_RS02355	Y1U_RS02415	DQL34_RS02865	STND_RS02470	BBD27_RS01995	AVT04_RS02545	SMQ301_RS02490	BGL51_RS02440
	threonine synthase	thrC	STACADC2_RS08540	B1761_RS04840	T303_RS00330	CG712_RS05340	STR_RS08820	BAY21_RS05535	CW339_RS09045	CR922_RS08980	CR921_RS09050	STH8232_RS09295	BEN15_RS02320	A9497_RS05250	STER_RS09070	STU_RS18215	AMD33_RS07925	MNA02_RS08945	Y1U_RS08935	DQL34_RS10405	STND_RS08930	BBD27_RS05095	AVT04_RS05690	SMQ301_RS09055	BGL51_RS09145
Cysteine biosynthesis	serine O-acetyltransferase	cysE	STACADC2_RS00550	B1761_RS06175	T303_RS01660	CG712_RS06570	STR_RS00570	BAY21_RS04275	CW339_RS00535	CR922_RS00540	CR921_RS00545	STH8232_RS00595	BEN15_RS03615	A9497_RS06580	STER_RS00580	STU_RS10045	AMD33_RS09240	MNA02_RS00570	Y1U_RS00560	DQL34_RS00615	STND_RS00600	BBD27_RS03770	AVT04_RS04435	SMQ301_RS00585	BGL51_RS00545
	serine acetyltransferase	cysE	STACADC2_RS04085	B1761_RS00035	T303_RS10265	-	STR_RS04245	BAY21_RS00690	CW339_RS04325	CR922_RS05195	CR921_RS04270	STH8232_RS04580	BEN15_RS07520	A9497_RS09840	STER_RS04390	STU_RS13595	AMD33_RS04185	MNA02_RS10155	Y1U_RS05200	-	STND_RS04245	BBD27_RS09720	AVT04_RS00815	SMQ301_RS04405	BGL51_RS04445
	serine acetyltransferase	cysE	-	-	-	-	-	-	-	-	-	-	-	-	-	STU_RS14610	-	-	-	-	-	-	-	-	-
	cysteine synthase A	cysK	STACADC2_RS01850	B1761_RS07565	T303_RS02945	CG712_RS07885	STR_RS01915	BAY21_RS02985	CW339_RS01825	CR922_RS07535	CR921_RS01890	STH8232_RS02055	BEN15_RS04955	A9497_RS07940	STER_RS01975	STU_RS11415	AMD33_RS00835	MNA02_RS01855	Y1U_RS01880	DQL34_RS02220	STND_RS01915	BBD27_RS02495	AVT04_RS03065	SMQ301_RS01990	BGL51_RS01945
	cysteine synthase family protein	cysK	STACADC2_RS04075	B1761_RS00025	T303_RS05385	-	STR_RS04235	BAY21_RS00700	CW339_RS04315	CR922_RS05205	CR921_RS04260	STH8232_RS04570	BEN15_RS07510	A9497_RS00635	STER_RS04380	STU_RS13585	AMD33_RS04195	MNA02_RS04295	Y1U_RS05210	-	STND_RS04235	BBD27_RS09730	AVT04_RS00825	SMQ301_RS04395	BGL51_RS04435
Methionine biosynthesis	aspartate kinase	lysC	STACADC2_RS01955	B1761_RS07670	T303_RS03040	CG712_RS07990	STR_RS02025	BAY21_RS02875	CW339_RS01930	CR922_RS07425	CR921_RS01995	STH8232_RS02160	BEN15_RS05060	A9497_RS08045	STER_RS02080	STU_RS11520	AMD33_RS00945	MNA02_RS01960	Y1U_RS01985	DQL34_RS02330	STND_RS02020	BBD27_RS02390	AVT04_RS02955	SMQ301_RS02095	BGL51_RS02050
	aspartate-semialdehyde dehydrogenase	asd	STACADC2_RS05960	B1761_RS02100	T303_RS07315	CG712_RS02700	STR_RS06140	BAY21_RS08220	CW339_RS06305	CR922_RS03265	CR921_RS06300	STH8232_RS06600	BEN15_RS09555	A9497_RS02545	STER_RS06290	STU_RS15530	AMD33_RS05215	MNA02_RS06220	Y1U_RS06225	DQL34_RS07240	STND_RS06220	BBD27_RS07805	AVT04_RS08380	SMQ301_RS06300	BGL51_RS06490
	homoserine dehydrogenase	hom	STACADC2_RS02370	B1761_RS08125	T303_RS03430	CG712_RS08415	STR_RS02435	BAY21_RS02470	CW339_RS02330	CR922_RS07015	CR921_RS02440	STH8232_RS02555	BEN15_RS05525	A9497_RS08435	STER_RS02485	STU_RS11915	AMD33_RS01370	MNA02_RS02350	Y1U_RS02410	DQL34_RS02860	STND_RS02465	BBD27_RS02000	AVT04_RS02550	SMQ301_RS02485	BGL51_RS02435
	homoserine O-succinyltransferase	metA	STACADC2_RS05590	B1761_RS01670	T303_RS06865	CG712_RS02330	STR_RS05785	BAY21_RS08570	CW339_RS05865	CR922_RS03625	CR921_RS05875	STH8232_RS06160	BEN15_RS09120	A9497_RS02100	STER_RS05865	STU_RS15165	AMD33_RS04765	MNA02_RS05770	Y1U_RS05775	DQL34_RS06805	STND_RS05780	BBD27_RS08250	AVT04_RS08730	SMQ301_RS05875	BGL51_RS06060
	cystathionine gamma-synthase	metB	STACADC2_RS01780	B1761_RS07495	T303_RS02870	CG712_RS07815	STR_RS01845	BAY21_RS03055	CW339_RS01755	CR922_RS07605	CR921_RS01820	STH8232_RS01980	BEN15_RS04880	A9497_RS07865	STER_RS01900	STU_RS11340	AMD33_RS00765	MNA02_RS01780	Y1U_RS01810	DQL34_RS02150	STND_RS01845	BBD27_RS02570	AVT04_RS03135	SMQ301_RS01915	BGL51_RS01875
	aminotransferase class V-fold PLP-dependent enzyme	metC	STACADC2_RS04080	B1761_RS00030	T303_RS05390	-	STR_RS04240	BAY21_RS00695	CW339_RS04320	CR922_RS05200	CR921_RS04265	STH8232_RS04575	BEN15_RS07515	A9497_RS00640	STER_RS04385	STU_RS13590	AMD33_RS04190	MNA02_RS04300	Y1U_RS05205	-	STND_RS04240	BBD27_RS09725	AVT04_RS00820	SMQ301_RS04400	BGL51_RS04440
	5-methyltetrahydropteroyltriglutamate--homocysteine S-methyltransferase	metE	STACADC2_RS03815	B1761_RS09670	T303_RS05075	CG712_RS00430	STR_RS03980	BAY21_RS00950	CW339_RS04015	CR922_RS05470	CR921_RS03960	STH8232_RS04275	BEN15_RS07180	A9497_RS00335	STER_RS04080	STU_RS13335	AMD33_RS02885	MNA02_RS03990	Y1U_RS03925	DQL34_RS04875	STND_RS03975	BBD27_RS00350	AVT04_RS01080	SMQ301_RS04090	BGL51_RS04065
Histidine biosynthesis	ATP phosphoribosyltransferase	hisG	-	B1761_RS01745	T303_RS06945	-	-	-	CW339_RS05945	-	CR921_RS05955	STH8232_RS06240	BEN15_RS09195	A9497_RS02180	STER_RS05945	-	AMD33_RS04840	MNA02_RS05850	Y1U_RS05850	DQL34_RS06880	STND_RS05855	BBD27_RS08170	-	SMQ301_RS05955	BGL51_RS06140
	ATP phosphoribosyltransferase regulatory subunit	hisZ	-	B1761_RS01750	T303_RS06950	-	-	-	CW339_RS05950	-	CR921_RS05960	STH8232_RS06245	BEN15_RS09200	A9497_RS02185	STER_RS05950	-	AMD33_RS04845	MNA02_RS05855	Y1U_RS05855	DQL34_RS06885	STND_RS05860	BBD27_RS08165	-	SMQ301_RS05960	BGL51_RS06145
	phosphoribosyl-ATP diphosphatase	hisE	-	B1761_RS01710	T303_RS06910	-	-	-	CW339_RS05910	-	CR921_RS05920	STH8232_RS06205	BEN15_RS09160	A9497_RS02145	STER_RS05910	-	AMD33_RS04805	MNA02_RS05815	Y1U_RS05815	DQL34_RS06845	STND_RS05820	BBD27_RS08205	-	SMQ301_RS05920	BGL51_RS06105
	phosphoribosyl-AMP cyclohydrolase	hisI	-	B1761_RS01715	T303_RS06915	-	-	-	CW339_RS05915	-	CR921_RS05925	STH8232_RS06210	BEN15_RS09165	A9497_RS02150	STER_RS05915	-	AMD33_RS04810	MNA02_RS05820	Y1U_RS05820	DQL34_RS06850	STND_RS05825	BBD27_RS08200	-	SMQ301_RS05925	BGL51_RS06110
	1-(5-phosphoribosyl)-5-((5- phosphoribosylamino)methylideneamino)imidazole-4- carboxamide isomerase	hisA	-	B1761_RS01725	T303_RS06925	-	-	-	CW339_RS05925	-	CR921_RS05935	STH8232_RS06220	BEN15_RS09175	A9497_RS02160	STER_RS05925	-	AMD33_RS04820	MNA02_RS05830	Y1U_RS05830	DQL34_RS06860	STND_RS05835	BBD27_RS08190	-	SMQ301_RS05935	BGL51_RS06120
	imidazole glycerol phosphate synthase subunit HisH	hisH	-	B1761_RS01730	T303_RS06930	-	-	-	CW339_RS05930	-	CR921_RS05940	STH8232_RS06225	BEN15_RS09180	A9497_RS02165	STER_RS05930	-	AMD33_RS04825	MNA02_RS05835	Y1U_RS05835	DQL34_RS06865	STND_RS05840	BBD27_RS08185	-	SMQ301_RS05940	BGL51_RS06125
	imidazole glycerol phosphate synthase subunit HisF	hisF	-	B1761_RS01720	T303_RS06920	-	-	-	CW339_RS05920	-	CR921_RS05930	STH8232_RS06215	BEN15_RS09170	A9497_RS02155	STER_RS05920	-	AMD33_RS04815	MNA02_RS05825	Y1U_RS05825	DQL34_RS06855	STND_RS05830	BBD27_RS08195	-	SMQ301_RS05930	BGL51_RS06115
	imidazoleglycerol-phosphate dehydratase	hisB	-	B1761_RS01735	T303_RS06935	-	-	-	CW339_RS05935	-	CR921_RS05945	STH8232_RS06230	BEN15_RS09185	A9497_RS02170	STER_RS05935	-	AMD33_RS04830	MNA02_RS05840	Y1U_RS05840	DQL34_RS06870	STND_RS05845	BBD27_RS08180	-	SMQ301_RS05945	BGL51_RS06130
	histidinol-phosphate transaminase	hisC	-	B1761_RS01755	T303_RS06955	-	-	-	CW339_RS05955	-	CR921_RS05965	STH8232_RS06250	BEN15_RS09205	A9497_RS02190	STER_RS05955	-	AMD33_RS04850	MNA02_RS05860	Y1U_RS05860	DQL34_RS06890	STND_RS05865	BBD27_RS08160	-	SMQ301_RS05965	BGL51_RS06150
	hypothetical protein	hisK	STACADC2_RS05640	B1761_RS01780	T303_RS06985	CG712_RS02375	STR_RS05835	BAY21_RS08520	CW339_RS05975	CR922_RS03575	CR921_RS05985	STH8232_RS06285	BEN15_RS09250	A9497_RS02220	STER_RS05985	STU_RS15215	AMD33_RS04890	MNA02_RS05890	Y1U_RS05900	DQL34_RS06910	STND_RS05900	BBD27_RS08130	AVT04_RS08680	SMQ301_RS05995	BGL51_RS06170
	histidinol dehydrogenase	hisD	-	B1761_RS01740	T303_RS06940	-	-	-	CW339_RS05940	-	CR921_RS05950	STH8232_RS06235	BEN15_RS09190	A9497_RS02175	STER_RS05940	-	AMD33_RS04835	MNA02_RS05845	Y1U_RS05845	DQL34_RS06875	STND_RS05850	BBD27_RS08175	-	SMQ301_RS05950	BGL51_RS06135
Glycine biosynthesis	serine hydroxymethyltransferase	glyA	STACADC2_RS03745	B1761_RS09510	T303_RS04920	CG712_RS00360	STR_RS03825	BAY21_RS01095	CW339_RS03880	CR922_RS05605	CR921_RS03885	STH8232_RS04170	BEN15_RS07105	A9497_RS00185	STER_RS03905	STU_RS13250	AMD33_RS02725	MNA02_RS03835	Y1U_RS03765	DQL34_RS04805	STND_RS03815	BBD27_RS00490	AVT04_RS01170	SMQ301_RS03905	BGL51_RS03905
Proline biosynthesis	glutamate-5-semialdehyde dehydrogenase	proA	STACADC2_RS07720	B1761_RS04010	T303_RS09200	CG712_RS04520	STR_RS08010	BAY21_RS06355	CW339_RS08220	CR922_RS01320	CR921_RS08235	STH8232_RS08465	BEN15_RS01495	A9497_RS04410	STER_RS08190	STU_RS17385	AMD33_RS07085	MNA02_RS08110	Y1U_RS08105	DQL34_RS09450	STND_RS08090	BBD27_RS05935	AVT04_RS06515	SMQ301_RS08180	BGL51_RS08345
	glutamate 5-kinase	proB	STACADC2_RS07725	B1761_RS04015	T303_RS09205	CG712_RS04525	STR_RS08015	BAY21_RS06350	CW339_RS08225	CR922_RS01315	CR921_RS08240	STH8232_RS08470	BEN15_RS01500	A9497_RS04415	STER_RS08195	STU_RS17390	AMD33_RS07090	MNA02_RS08115	Y1U_RS08110	DQL34_RS09455	STND_RS08095	BBD27_RS05930	AVT04_RS06510	SMQ301_RS08185	BGL51_RS08350
	pyrroline-5-carboxylate reductase	proC	STACADC2_RS08410	B1761_RS04705	T303_RS00195	CG712_RS05210	STR_RS08690	BAY21_RS05665	CW339_RS08910	CR922_RS08850	CR921_RS08915	STH8232_RS09160	BEN15_RS02185	A9497_RS05115	STER_RS08930	STU_RS18085	AMD33_RS07790	MNA02_RS08810	Y1U_RS08805	DQL34_RS10275	STND_RS08795	BBD27_RS05230	AVT04_RS05820	SMQ301_RS08920	BGL51_RS09010
Glutamine biosynthesis	type I glutamate--ammonia ligase	glnA	STACADC2_RS08040	B1761_RS04325	T303_RS09515	CG712_RS04840	STR_RS08325	BAY21_RS06040	CW339_RS08535	CR922_RS01005	CR921_RS08550	STH8232_RS08780	BEN15_RS01810	A9497_RS04725	STER_RS08555	STU_RS17705	AMD33_RS07400	MNA02_RS08425	Y1U_RS08420	DQL34_RS09900	STND_RS08405	BBD27_RS05620	AVT04_RS06195	SMQ301_RS08545	BGL51_RS08655
Arginine biosynthesis	bifunctional glutamate N-acetyltransferase/amino-acid acetyltransferase ArgJ	argJ	STACADC2_RS02350	B1761_RS08105	T303_RS03410	CG712_RS08395	STR_RS02415	BAY21_RS02490	CW339_RS02310	CR922_RS07035	CR921_RS02420	STH8232_RS02535	BEN15_RS05505	A9497_RS08415	STER_RS02460	STU_RS11895	AMD33_RS01350	MNA02_RS02330	Y1U_RS02390	DQL34_RS02840	STND_RS02445	BBD27_RS02020	AVT04_RS02570	SMQ301_RS02465	BGL51_RS02415
	acetylglutamate kinase	argB	STACADC2_RS02355	B1761_RS08110	T303_RS03415	CG712_RS08400	STR_RS02420	BAY21_RS02485	CW339_RS02315	CR922_RS07030	CR921_RS02425	STH8232_RS02540	BEN15_RS05510	A9497_RS08420	STER_RS02465	STU_RS11900	AMD33_RS01355	MNA02_RS02335	Y1U_RS02395	DQL34_RS02845	STND_RS02450	BBD27_RS02015	AVT04_RS02565	SMQ301_RS02470	BGL51_RS02420
	N-acetyl-gamma-glutamyl-phosphate reductase	argC	STACADC2_RS02345	B1761_RS08100	T303_RS03405	CG712_RS08390	STR_RS02410	BAY21_RS02495	CW339_RS02305	CR922_RS07040	CR921_RS02415	STH8232_RS02530	BEN15_RS05500	A9497_RS08410	STER_RS02455	STU_RS11890	AMD33_RS01345	MNA02_RS02325	Y1U_RS02385	DQL34_RS02835	STND_RS02440	BBD27_RS02025	AVT04_RS02575	SMQ301_RS02460	BGL51_RS02410
	acetylornithine transaminase	argD	STACADC2_RS02360	B1761_RS08115	T303_RS03420	CG712_RS08405	STR_RS02425	BAY21_RS02480	CW339_RS02320	CR922_RS07025	CR921_RS02430	STH8232_RS02545	BEN15_RS05515	A9497_RS08425	STER_RS02470	STU_RS11905	AMD33_RS01360	MNA02_RS02340	Y1U_RS02400	DQL34_RS02850	STND_RS02455	BBD27_RS02010	AVT04_RS02560	SMQ301_RS02475	BGL51_RS02425
	bifunctional glutamate N-acetyltransferase/amino-acid acetyltransferase ArgJ	argJ	STACADC2_RS02350	B1761_RS08105	T303_RS03410	CG712_RS08395	STR_RS02415	BAY21_RS02490	CW339_RS02310	CR922_RS07035	CR921_RS02420	STH8232_RS02535	BEN15_RS05505	A9497_RS08415	STER_RS02460	STU_RS11895	AMD33_RS01350	MNA02_RS02330	Y1U_RS02390	DQL34_RS02840	STND_RS02445	BBD27_RS02020	AVT04_RS02570	SMQ301_RS02465	BGL51_RS02415
	ornithine carbamoyltransferase	argF	STACADC2_RS03015	B1761_RS08790	T303_RS04140	CG712_RS09065	STR_RS03095	BAY21_RS01815	CW339_RS03060	CR922_RS06375	CR921_RS03180	STH8232_RS03475	BEN15_RS06175	A9497_RS09165	STER_RS03200	STU_RS12570	AMD33_RS02020	MNA02_RS03060	Y1U_RS03060	DQL34_RS03720	STND_RS03135	BBD27_RS01265	AVT04_RS01895	SMQ301_RS03180	BGL51_RS03155
	argininosuccinate synthase	argG	STACADC2_RS08230	B1761_RS04520	T303_RS00025	CG712_RS05030	STR_RS08520	BAY21_RS05845	CW339_RS08735	CR922_RS08680	CR921_RS08745	STH8232_RS08990	BEN15_RS02010	A9497_RS04935	STER_RS08765	STU_RS17905	AMD33_RS07610	MNA02_RS08640	Y1U_RS08635	DQL34_RS10105	STND_RS08615	BBD27_RS05410	AVT04_RS06000	SMQ301_RS08755	BGL51_RS08845
	argininosuccinate lyase	argH	STACADC2_RS08225	B1761_RS04515	T303_RS00020	CG712_RS05025	STR_RS08515	BAY21_RS05850	CW339_RS08730	CR922_RS08675	CR921_RS08740	STH8232_RS08985	BEN15_RS02005	A9497_RS04930	STER_RS08760	STU_RS17900	AMD33_RS07605	MNA02_RS08635	Y1U_RS08630	DQL34_RS10100	STND_RS08610	BBD27_RS05415	AVT04_RS06005	SMQ301_RS08750	BGL51_RS08840
Asparagine biosynthesis (from aspartate)	asparagine synthetase A	asnA	STACADC2_RS01950	B1761_RS07665	T303_RS03035	CG712_RS07985	STR_RS02020	BAY21_RS02880	CW339_RS01925	CR922_RS07430	CR921_RS01990	STH8232_RS02155	BEN15_RS05055	A9497_RS08040	STER_RS02075	STU_RS11515	AMD33_RS00940	MNA02_RS01955	Y1U_RS01980	DQL34_RS02325	STND_RS02015	BBD27_RS02395	AVT04_RS02960	SMQ301_RS02090	BGL51_RS02045
Valine biosynthesis	acetolactate synthase AlsS	ilvB	STACADC2_RS04400	B1761_RS00315	T303_RS05670	CG712_RS00960	STR_RS04555	BAY21_RS00375	CW339_RS04615	CR922_RS04870	CR921_RS04560	STH8232_RS04910	BEN15_RS07760	A9497_RS00905	STER_RS04645	STU_RS13905	AMD33_RS03935	MNA02_RS04580	Y1U_RS04950	DQL34_RS05680	STND_RS04485	BBD27_RS09445	AVT04_RS00495,	SMQ301_RS04625	BGL51_RS04725
	acetolactate synthase I large subunit	ilvB	STACADC2_RS08515	B1761_RS04815	T303_RS00305	CG712_RS05315	STR_RS08795	BAY21_RS05560	CW339_RS09020	CR922_RS08955	CR921_RS09025	STH8232_RS09270	BEN15_RS02295	A9497_RS05225	STER_RS09040	STU_RS18190	AMD33_RS07900	MNA02_RS08920	Y1U_RS08910	DQL34_RS10380	STND_RS08905	BBD27_RS05120	AVT04_RS05715	SMQ301_RS09030	BGL51_RS09120
	acetolactate synthase small subunit	ilvN	STACADC2_RS08510	B1761_RS04810	T303_RS00300	CG712_RS05310	STR_RS08790	BAY21_RS05565	CW339_RS09015	CR922_RS08950	CR921_RS09020	STH8232_RS09265	BEN15_RS02290	A9497_RS05220	STER_RS09035	STU_RS18185	AMD33_RS07895	MNA02_RS08915	Y1U_RS08905	DQL34_RS10375	STND_RS08900	BBD27_RS05125	AVT04_RS05720	SMQ301_RS09025	BGL51_RS09115
	ketol-acid reductoisomerase	ilvC	STACADC2_RS08505	B1761_RS04805	T303_RS00295	CG712_RS05305	STR_RS08785	BAY21_RS05570	CW339_RS09010	CR922_RS08945	CR921_RS09015	STH8232_RS09260	BEN15_RS02285	A9497_RS05215	STER_RS09030	STU_RS18180	AMD33_RS07890	MNA02_RS08910	Y1U_RS08900	DQL34_RS10370	STND_RS08895	BBD27_RS05130	AVT04_RS05725	SMQ301_RS09020	BGL51_RS09110
	dihydroxy-acid dehydratase	ilvD	STACADC2_RS07240	B1761_RS03510	T303_RS08700	CG712_RS04030	STR_RS07535	BAY21_RS06835	CW339_RS07705	CR922_RS01830	CR921_RS07790	STH8232_RS07965	BEN15_RS01075	A9497_RS03910	STER_RS07700	STU_RS16885	AMD33_RS06600	MNA02_RS07605	Y1U_RS07620	DQL34_RS08820	STND_RS07610	BBD27_RS06435	AVT04_RS06995	SMQ301_RS07685	BGL51_RS07905
	dihydroxy-acid dehydratase	ilvD	STACADC2_RS08520	B1761_RS04820	T303_RS00310	CG712_RS05320	STR_RS08800	BAY21_RS05555	CW339_RS09025	CR922_RS08960	CR921_RS09030	STH8232_RS09275	BEN15_RS02300	A9497_RS05230	STER_RS09045	STU_RS18195	AMD33_RS07905	MNA02_RS08925	Y1U_RS08915	DQL34_RS10385	STND_RS08910	BBD27_RS05115	AVT04_RS05710	SMQ301_RS09035	BGL51_RS09125
	branched-chain amino acid aminotransferase	ilvE	STACADC2_RS02935	B1761_RS08715	T303_RS04070	CG712_RS08995	STR_RS03010	BAY21_RS01900	CW339_RS02990	CR922_RS06445	CR921_RS03110	STH8232_RS03405	BEN15_RS06095	A9497_RS09090	STER_RS03115	STU_RS12485	AMD33_RS01945	MNA02_RS02990	Y1U_RS02990	DQL34_RS03650	STND_RS03060	BBD27_RS01340	AVT04_RS01980	SMQ301_RS03095	BGL51_RS03085
Isoleucine biosynthesis	threonine dehydratase	ilvA	STACADC2_RS00865	B1761_RS06585	T303_RS01975	CG712_RS06955	STR_RS00970	BAY21_RS03940	CW339_RS00860	CR922_RS08490	CR921_RS00930	STH8232_RS01100	BEN15_RS03965	A9497_RS06960	STER_RS01005	STU_RS10440	AMD33_RS09640	MNA02_RS00885	Y1U_RS00895	DQL34_RS01230	STND_RS00940	BBD27_RS03460	AVT04_RS04025	SMQ301_RS01005	BGL51_RS00975
	acetolactate synthase AlsS	ilvB	STACADC2_RS04400	B1761_RS00315	T303_RS05670	CG712_RS00960	STR_RS04555	BAY21_RS00375	CW339_RS04615	CR922_RS04870	CR921_RS04560	STH8232_RS04910	BEN15_RS07760	A9497_RS00905	STER_RS04645	STU_RS13905	AMD33_RS03935	MNA02_RS04580	Y1U_RS04950	DQL34_RS05680	STND_RS04485	BBD27_RS09445	AVT04_RS00495,	SMQ301_RS04625	BGL51_RS04725
	acetolactate synthase I large subunit	ilvB	STACADC2_RS08515	B1761_RS04815	T303_RS00305	CG712_RS05315	STR_RS08795	BAY21_RS05560	CW339_RS09020	CR922_RS08955	CR921_RS09025	STH8232_RS09270	BEN15_RS02295	A9497_RS05225	STER_RS09040	STU_RS18190	AMD33_RS07900	MNA02_RS08920	Y1U_RS08910	DQL34_RS10380	STND_RS08905	BBD27_RS05120	AVT04_RS05715	SMQ301_RS09030	BGL51_RS09120
	acetolactate synthase small subunit	ilvN	STACADC2_RS08510	B1761_RS04810	T303_RS00300	CG712_RS05310	STR_RS08790	BAY21_RS05565	CW339_RS09015	CR922_RS08950	CR921_RS09020	STH8232_RS09265	BEN15_RS02290	A9497_RS05220	STER_RS09035	STU_RS18185	AMD33_RS07895	MNA02_RS08915	Y1U_RS08905	DQL34_RS10375	STND_RS08900	BBD27_RS05125	AVT04_RS05720	SMQ301_RS09025	BGL51_RS09115
	ketol-acid reductoisomerase	ilvC	STACADC2_RS08505	B1761_RS04805	T303_RS00295	CG712_RS05305	STR_RS08785	BAY21_RS05570	CW339_RS09010	CR922_RS08945	CR921_RS09015	STH8232_RS09260	BEN15_RS02285	A9497_RS05215	STER_RS09030	STU_RS18180	AMD33_RS07890	MNA02_RS08910	Y1U_RS08900	DQL34_RS10370	STND_RS08895	BBD27_RS05130	AVT04_RS05725	SMQ301_RS09020	BGL51_RS09110
	dihydroxy-acid dehydratase	ilvD	STACADC2_RS07240	B1761_RS03510	T303_RS08700	CG712_RS04030	STR_RS07535	BAY21_RS06835	CW339_RS07705	CR922_RS01830	CR921_RS07790	STH8232_RS07965	BEN15_RS01075	A9497_RS03910	STER_RS07700	STU_RS16885	AMD33_RS06600	MNA02_RS07605	Y1U_RS07620	DQL34_RS08820	STND_RS07610	BBD27_RS06435	AVT04_RS06995	SMQ301_RS07685	BGL51_RS07905
	dihydroxy-acid dehydratase	ilvD	STACADC2_RS08520	B1761_RS04820	T303_RS00310	CG712_RS05320	STR_RS08800	BAY21_RS05555	CW339_RS09025	CR922_RS08960	CR921_RS09030	STH8232_RS09275	BEN15_RS02300	A9497_RS05230	STER_RS09045	STU_RS18195	AMD33_RS07905	MNA02_RS08925	Y1U_RS08915	DQL34_RS10385	STND_RS08910	BBD27_RS05115	AVT04_RS05710	SMQ301_RS09035	BGL51_RS09125
	branched-chain amino acid aminotransferase	ilvE	STACADC2_RS02935	B1761_RS08715	T303_RS04070	CG712_RS08995	STR_RS03010	BAY21_RS01900	CW339_RS02990	CR922_RS06445	CR921_RS03110	STH8232_RS03405	BEN15_RS06095	A9497_RS09090	STER_RS03115	STU_RS12485	AMD33_RS01945	MNA02_RS02990	Y1U_RS02990	DQL34_RS03650	STND_RS03060	BBD27_RS01340	AVT04_RS01980	SMQ301_RS03095	BGL51_RS03085
Leucine biosynthesis	acetolactate synthase AlsS	ilvB	STACADC2_RS04400	B1761_RS00315	T303_RS05670	CG712_RS00960	STR_RS04555	BAY21_RS00375	CW339_RS04615	CR922_RS04870	CR921_RS04560	STH8232_RS04910	BEN15_RS07760	A9497_RS00905	STER_RS04645	STU_RS13905	AMD33_RS03935	MNA02_RS04580	Y1U_RS04950	DQL34_RS05680	STND_RS04485	BBD27_RS09445	AVT04_RS00495,	SMQ301_RS04625	BGL51_RS04725
	acetolactate synthase I large subunit	ilvB	STACADC2_RS08515	B1761_RS04815	T303_RS00305	CG712_RS05315	STR_RS08795	BAY21_RS05560	CW339_RS09020	CR922_RS08955	CR921_RS09025	STH8232_RS09270	BEN15_RS02295	A9497_RS05225	STER_RS09040	STU_RS18190	AMD33_RS07900	MNA02_RS08920	Y1U_RS08910	DQL34_RS10380	STND_RS08905	BBD27_RS05120	AVT04_RS05715	SMQ301_RS09030	BGL51_RS09120
	acetolactate synthase small subunit	ilvN	STACADC2_RS08510	B1761_RS04810	T303_RS00300	CG712_RS05310	STR_RS08790	BAY21_RS05565	CW339_RS09015	CR922_RS08950	CR921_RS09020	STH8232_RS09265	BEN15_RS02290	A9497_RS05220	STER_RS09035	STU_RS18185	AMD33_RS07895	MNA02_RS08915	Y1U_RS08905	DQL34_RS10375	STND_RS08900	BBD27_RS05125	AVT04_RS05720	SMQ301_RS09025	BGL51_RS09115
	ketol-acid reductoisomerase	ilvC	STACADC2_RS08505	B1761_RS04805	T303_RS00295	CG712_RS05305	STR_RS08785	BAY21_RS05570	CW339_RS09010	CR922_RS08945	CR921_RS09015	STH8232_RS09260	BEN15_RS02285	A9497_RS05215	STER_RS09030	STU_RS18180	AMD33_RS07890	MNA02_RS08910	Y1U_RS08900	DQL34_RS10370	STND_RS08895	BBD27_RS05130	AVT04_RS05725	SMQ301_RS09020	BGL51_RS09110
	dihydroxy-acid dehydratase	ilvD	STACADC2_RS07240	B1761_RS03510	T303_RS08700	CG712_RS04030	STR_RS07535	BAY21_RS06835	CW339_RS07705	CR922_RS01830	CR921_RS07790	STH8232_RS07965	BEN15_RS01075	A9497_RS03910	STER_RS07700	STU_RS16885	AMD33_RS06600	MNA02_RS07605	Y1U_RS07620	DQL34_RS08820	STND_RS07610	BBD27_RS06435	AVT04_RS06995	SMQ301_RS07685	BGL51_RS07905
	2-isopropylmalate synthase	leuA	STACADC2_RS05505	B1761_RS01585	T303_RS06780	CG712_RS02245	STR_RS05690	BAY21_RS08665	CW339_RS05765	CR922_RS03730	CR921_RS05775	STH8232_RS06075	BEN15_RS09035	A9497_RS02015	STER_RS05780	STU_RS15080	AMD33_RS04680	MNA02_RS05685	Y1U_RS05690	DQL34_RS06720	STND_RS05695	BBD27_RS08335	AVT04_RS08825	SMQ301_RS05790	BGL51_RS05975
	3-isopropylmalate dehydratase large subunit	leuC	STACADC2_RS05490	B1761_RS01570	T303_RS06765	CG712_RS02230	STR_RS05675	BAY21_RS08680	CW339_RS05765	CR922_RS03730	CR921_RS05775	STH8232_RS06060	BEN15_RS09020	A9497_RS02000	STER_RS05765	STU_RS15065	AMD33_RS04665	MNA02_RS05670	Y1U_RS05675	DQL34_RS06705	STND_RS05680	BBD27_RS08350	AVT04_RS08840	SMQ301_RS05775	BGL51_RS05960
	3-isopropylmalate dehydratase small subunit	leuD	STACADC2_RS05485	B1761_RS01565	T303_RS06760	CG712_RS02225	STR_RS05670	BAY21_RS08685	CW339_RS05760	CR922_RS03735	CR921_RS05770	STH8232_RS06055	BEN15_RS09015	A9497_RS01995	STER_RS05760	STU_RS15060	AMD33_RS04660	MNA02_RS05665	Y1U_RS05670	DQL34_RS06700	STND_RS05675	BBD27_RS08355	AVT04_RS08845	SMQ301_RS05770	BGL51_RS05955
	3-isopropylmalate dehydrogenase	leuB	STACADC2_RS05500	B1761_RS01580	T303_RS06775	CG712_RS02240	STR_RS05685	BAY21_RS08670	CW339_RS05775	CR922_RS03720	CR921_RS05785	STH8232_RS06070	BEN15_RS09030	A9497_RS02010	STER_RS05775	STU_RS15075	AMD33_RS04675	MNA02_RS05680	Y1U_RS05685	DQL34_RS06715	STND_RS05690	BBD27_RS08340	AVT04_RS08830	SMQ301_RS05785	BGL51_RS05970
	branched-chain amino acid aminotransferase	ilvE	STACADC2_RS02935	B1761_RS08715	T303_RS04070	CG712_RS08995	STR_RS03010	BAY21_RS01900	CW339_RS02990	CR922_RS06445	CR921_RS03110	STH8232_RS03405	BEN15_RS06095	A9497_RS09090	STER_RS03115	STU_RS12485	AMD33_RS01945	MNA02_RS02990	Y1U_RS02990	DQL34_RS03650	STND_RS03060	BBD27_RS01340	AVT04_RS01980	SMQ301_RS03095	BGL51_RS03085
Tryptophan biosynthesis	3-deoxy-7-phosphoheptulonate synthase	aroG1	STACADC2_RS07810	B1761_RS04095	T303_RS09285	CG712_RS04610	-	-	CW339_RS08305	CR922_RS01235	CR921_RS08320	STH8232_RS08550	BEN15_RS01580	A9497_RS04495	STER_RS08325	STU_RS17470	AMD33_RS07170	MNA02_RS08195	Y1U_RS08190	DQL34_RS09535	STND_RS08175	BBD27_RS05850	AVT04_RS06430	SMQ301_RS08315	BGL51_RS08430
	3-deoxy-7-phosphoheptulonate synthase	aroG2	STACADC2_RS07815	B1761_RS04100	T303_RS09290	CG712_RS04615	STR_RS08095	BAY21_RS06270	CW339_RS08310	CR922_RS01230	CR921_RS08325	STH8232_RS08555	BEN15_RS01585	A9497_RS04500	STER_RS08330	STU_RS17475	AMD33_RS07175	MNA02_RS08200	Y1U_RS08195	DQL34_RS09540	STND_RS08180	BBD27_RS05845	AVT04_RS06425	SMQ301_RS08320	-
	3-dehydroquinate synthase	aroB	STACADC2_RS03230	B1761_RS09000	T303_RS04335	CG712_RS09270	STR_RS03275	BAY21_RS01640	CW339_RS03275	CR922_RS06175	CR921_RS03380	STH8232_RS03660	BEN15_RS06365	A9497_RS09355	STER_RS03395	STU_RS12750	AMD33_RS02210	MNA02_RS03255	Y1U_RS03255	DQL34_RS04190	STND_RS03330	BBD27_RS01075	AVT04_RS01720	SMQ301_RS03380	BGL51_RS03365
	type I 3-dehydroquinate dehydratase	aroD	STACADC2_RS03220	B1761_RS08990	T303_RS04325	CG712_RS09260	STR_RS03265	BAY21_RS01650	CW339_RS03265	CR922_RS06185	CR921_RS03370	STH8232_RS03650	BEN15_RS06355	A9497_RS09345	STER_RS03385	STU_RS12740	AMD33_RS02200	MNA02_RS03245	Y1U_RS03245	DQL34_RS04180	STND_RS03320	BBD27_RS01085	AVT04_RS01730	SMQ301_RS03370	BGL51_RS03355
	shikimate dehydrogenase	aroE	STACADC2_RS03225	B1761_RS08995	T303_RS04330	CG712_RS09265	STR_RS03270	BAY21_RS01645	CW339_RS03270	CR922_RS06180	CR921_RS03375	STH8232_RS03655	BEN15_RS06360	A9497_RS09350	STER_RS03390	STU_RS12745	AMD33_RS02205	MNA02_RS03250	Y1U_RS03250	DQL34_RS04185	STND_RS03325	BBD27_RS01080	AVT04_RS01725	SMQ301_RS03375	BGL51_RS03360
	shikimate kinase	aroK	STACADC2_RS03260	B1761_RS09030	T303_RS04365	CG712_RS09300	STR_RS03305	BAY21_RS01610	CW339_RS03305	CR922_RS06145	CR921_RS03410	STH8232_RS03690	BEN15_RS06395	A9497_RS09385	STER_RS03425	STU_RS12780	AMD33_RS02240	MNA02_RS03285	Y1U_RS03285	DQL34_RS04220	STND_RS03360	BBD27_RS01045	AVT04_RS01690	SMQ301_RS03410	BGL51_RS03395
	3-phosphoshikimate 1-carboxyvinyltransferase	aroA	STACADC2_RS03255	B1761_RS09025	T303_RS04360	CG712_RS09295	STR_RS03300	BAY21_RS01615	CW339_RS03300	CR922_RS06150	CR921_RS03405	STH8232_RS03685	BEN15_RS06390	A9497_RS09380	STER_RS03420	STU_RS12775	AMD33_RS02235	MNA02_RS03280	Y1U_RS03280	DQL34_RS04215	STND_RS03355	BBD27_RS01050	AVT04_RS01695	SMQ301_RS03405	BGL51_RS03390
	chorismate synthase	aroC	STACADC2_RS03235	B1761_RS09005	T303_RS04340	CG712_RS09275	STR_RS03280	BAY21_RS01635	CW339_RS03280	CR922_RS06170	CR921_RS03385	STH8232_RS03665	BEN15_RS06370	A9497_RS09360	STER_RS03400	STU_RS12755	AMD33_RS02215	MNA02_RS03260	Y1U_RS03260	DQL34_RS04195	STND_RS03335	BBD27_RS01070	AVT04_RS01715	SMQ301_RS03385	BGL51_RS03370
	aminodeoxychorismate/anthranilate synthase component II	trpG	STACADC2_RS07180	B1761_RS03450	T303_RS08640	CG712_RS03970	STR_RS07475	BAY21_RS06895	CW339_RS07645	CR922_RS01890	CR921_RS07730	STH8232_RS07905	BEN15_RS00980	A9497_RS03850	STER_RS07635	STU_RS16825	AMD33_RS06540	MNA02_RS07545	Y1U_RS07560	DQL34_RS08690	STND_RS07550	BBD27_RS06495	AVT04_RS07055	SMQ301_RS07620	BGL51_RS07840
	anthranilate synthase component I	trpE	STACADC2_RS07185	B1761_RS03455	T303_RS08645	CG712_RS03975	STR_RS07480	BAY21_RS06890	CW339_RS07650	CR922_RS01885	CR921_RS07735	STH8232_RS07910	BEN15_RS00985	A9497_RS03855	STER_RS07640	STU_RS16830	AMD33_RS06545	MNA02_RS07550	Y1U_RS07565	DQL34_RS08695	STND_RS07555	BBD27_RS06490	AVT04_RS07050	SMQ301_RS07625	BGL51_RS07845
	anthranilate phosphoribosyltransferase	trpD	STACADC2_RS07175	B1761_RS03445	T303_RS08635	CG712_RS03965	STR_RS07470	BAY21_RS06900	CW339_RS07640	CR922_RS01895	CR921_RS07725	STH8232_RS07900	BEN15_RS00975	A9497_RS03845	STER_RS07630	STU_RS16820	AMD33_RS06535	MNA02_RS07540	Y1U_RS07555	DQL34_RS08685	STND_RS07545	BBD27_RS06500	AVT04_RS07060	SMQ301_RS07615	BGL51_RS07835
	phosphoribosylanthranilate isomerase	trpF	STACADC2_RS07165	B1761_RS03435	T303_RS08625	CG712_RS03955	STR_RS07460	BAY21_RS06910	CW339_RS07630	CR922_RS01905	CR921_RS07715	STH8232_RS07890	BEN15_RS00965	A9497_RS03835	STER_RS07620	STU_RS16810	AMD33_RS06525	MNA02_RS07530	Y1U_RS07545	DQL34_RS08675	STND_RS07535	BBD27_RS06510	AVT04_RS07070	SMQ301_RS07605	BGL51_RS07825
	indole-3-glycerol phosphate synthase TrpC	trpC	STACADC2_RS07170	B1761_RS03440	T303_RS08630	CG712_RS03960	STR_RS07465	BAY21_RS06905	CW339_RS07635	CR922_RS01900	CR921_RS07720	STH8232_RS07895	BEN15_RS00970	A9497_RS03840	STER_RS07625	STU_RS16815	AMD33_RS06530	MNA02_RS07535	Y1U_RS07550	DQL34_RS08680	STND_RS07540	BBD27_RS06505	AVT04_RS07065	SMQ301_RS07610	BGL51_RS07830
	tryptophan synthase subunit alpha	trpA	STACADC2_RS07155	B1761_RS03425	T303_RS08615	CG712_RS03945	STR_RS07450	BAY21_RS06920	CW339_RS07620	CR922_RS01915	CR921_RS07705	STH8232_RS07880	BEN15_RS00955	A9497_RS03825	STER_RS07610	STU_RS16800	AMD33_RS06515	MNA02_RS07520	Y1U_RS07535	DQL34_RS08665	STND_RS07525	BBD27_RS06520	AVT04_RS07080	SMQ301_RS07595	BGL51_RS07815
	tryptophan synthase subunit beta	trpB	STACADC2_RS07160	B1761_RS03430	T303_RS08620	CG712_RS03950	STR_RS07455	BAY21_RS06915	CW339_RS07625	CR922_RS01910	CR921_RS07710	STH8232_RS07885	BEN15_RS00960	A9497_RS03830	STER_RS07615	STU_RS16805	AMD33_RS06520	MNA02_RS07525	Y1U_RS07540	DQL34_RS08670	STND_RS07530	BBD27_RS06515	AVT04_RS07075	SMQ301_RS07600	BGL51_RS07820
Phenylalanine biosynthesis	chorismate mutase	aroH	STACADC2_RS05390	B1761_RS01460	T303_RS06655	CG712_RS02130	STR_RS05570	BAY21_RS08785	CW339_RS05660	CR922_RS03835	CR921_RS05670	STH8232_RS05965	BEN15_RS08920	A9497_RS01890	STER_RS05655	STU_RS14960	AMD33_RS04550	MNA02_RS05560	Y1U_RS05560	DQL34_RS06600	STND_RS05565	BBD27_RS08460	AVT04_RS08945	SMQ301_RS05665	BGL51_RS05855
	prephenate dehydratase	pheA2	STACADC2_RS03265	B1761_RS09035	T303_RS04370	CG712_RS09305	STR_RS03310	BAY21_RS01605	CW339_RS03310	CR922_RS06140	CR921_RS03415	STH8232_RS03695	BEN15_RS06400	A9497_RS09390	STER_RS03430	STU_RS12785	AMD33_RS02245	MNA02_RS03290	Y1U_RS03290	DQL34_RS04225	STND_RS03365	BBD27_RS01040	AVT04_RS01685	SMQ301_RS03415	BGL51_RS03400
	pyridoxal phosphate-dependent aminotransferase		STACADC2_RS03945	B1761_RS09800	T303_RS05255	CG712_RS00560	STR_RS04115	BAY21_RS00815	CW339_RS04190	CR922_RS05335	CR921_RS04135	STH8232_RS04455	BEN15_RS07300	A9497_RS00515	STER_RS04255	STU_RS13470	AMD33_RS04315	MNA02_RS04170	Y1U_RS05330	DQL34_RS05010	STND_RS04110	BBD27_RS00175	AVT04_RS00945	SMQ301_RS04270	BGL51_RS04240
Tyrosine biosynthesis	chorismate mutase	aroH	STACADC2_RS05390	B1761_RS01460	T303_RS06655	CG712_RS02130	STR_RS05570	BAY21_RS08785	CW339_RS05660	CR922_RS03835	CR921_RS05670	STH8232_RS05965	BEN15_RS08920	A9497_RS01890	STER_RS05655	STU_RS14960	AMD33_RS04550	MNA02_RS05560	Y1U_RS05560	DQL34_RS06600	STND_RS05565	BBD27_RS08460	AVT04_RS08945	SMQ301_RS05665	BGL51_RS05855
	prephenate dehydrogenase	tyrA	STACADC2_RS03240	B1761_RS09010	T303_RS04345	CG712_RS09280	STR_RS03285	BAY21_RS01630	CW339_RS03285	CR922_RS06165	CR921_RS03390	STH8232_RS03670	BEN15_RS06375	A9497_RS09365	STER_RS03405	STU_RS12760	AMD33_RS02220	MNA02_RS03265	Y1U_RS03265	DQL34_RS04200	STND_RS03340	BBD27_RS01065	AVT04_RS01710	SMQ301_RS03390	BGL51_RS03375
	pyridoxal phosphate-dependent aminotransferase		STACADC2_RS03945	B1761_RS09800	T303_RS05255	CG712_RS00560	STR_RS04115	BAY21_RS00815	CW339_RS04190	CR922_RS05335	CR921_RS04135	STH8232_RS04455	BEN15_RS07300	A9497_RS00515	STER_RS04255	STU_RS13470	AMD33_RS04315	MNA02_RS04170	Y1U_RS05330	DQL34_RS05010	STND_RS04110	BBD27_RS00175	AVT04_RS00945	SMQ301_RS04270	BGL51_RS04240
Alanine biosynthesis	pyridoxal phosphate-dependent aminotransferase		STACADC2_RS07400	B1761_RS03670	T303_RS08855	CG712_RS04190	STR_RS07690	BAY21_RS06680	CW339_RS07870	CR922_RS01665	CR921_RS07975	STH8232_RS08120	BEN15_RS01230	A9497_RS04065	STER_RS07855	STU_RS17040	AMD33_RS06755	MNA02_RS07760	Y1U_RS07775	DQL34_RS09000	STND_RS07765	BBD27_RS06280	AVT04_RS06840	SMQ301_RS07840	BGL51_RS08065
Aspartate biosynthesis	pyridoxal phosphate-dependent aminotransferase		STACADC2_RS03945	B1761_RS09800	T303_RS05255	CG712_RS00560	STR_RS04115	BAY21_RS00815	CW339_RS04190	CR922_RS05335	CR921_RS04135	STH8232_RS04455	BEN15_RS07300	A9497_RS00515	STER_RS04255	STU_RS13470	AMD33_RS04315	MNA02_RS04170	Y1U_RS05330	DQL34_RS05010	STND_RS04110	BBD27_RS00175	AVT04_RS00945	SMQ301_RS04270	BGL51_RS04240
Glutamate biosynthesis	pyridoxal phosphate-dependent aminotransferase		STACADC2_RS03945	B1761_RS09800	T303_RS05255	CG712_RS00560	STR_RS04115	BAY21_RS00815	CW339_RS04190	CR922_RS05335	CR921_RS04135	STH8232_RS04455	BEN15_RS07300	A9497_RS00515	STER_RS04255	STU_RS13470	AMD33_RS04315	MNA02_RS04170	Y1U_RS05330	DQL34_RS05010	STND_RS04110	BBD27_RS00175	AVT04_RS00945	SMQ301_RS04270	BGL51_RS04240
	pyridoxal phosphate-dependent aminotransferase		STACADC2_RS07400	B1761_RS03670	T303_RS08855	CG712_RS04190	STR_RS07690	BAY21_RS06680	CW339_RS07870	CR922_RS01665	CR921_RS07975	STH8232_RS08120	BEN15_RS01230	A9497_RS04065	STER_RS07855	STU_RS17040	AMD33_RS06755	MNA02_RS07760	Y1U_RS07775	DQL34_RS09000	STND_RS07765	BBD27_RS06280	AVT04_RS06840	SMQ301_RS07840	BGL51_RS08065
Lysine biosynthesis (succinyl-Dap pathway)	aspartate kinase	lysC	STACADC2_RS01955	B1761_RS07670	T303_RS03040	CG712_RS07990	STR_RS02025	BAY21_RS02875	CW339_RS01930	CR922_RS07425	CR921_RS01995	STH8232_RS02160	BEN15_RS05060	A9497_RS08045	STER_RS02080	STU_RS11520	AMD33_RS00945	MNA02_RS01960	Y1U_RS01985	DQL34_RS02330	STND_RS02020	BBD27_RS02390	AVT04_RS02955	SMQ301_RS02095	BGL51_RS02050
	aspartate-semialdehyde dehydrogenase	asd	STACADC2_RS05960	B1761_RS02100	T303_RS07315	CG712_RS02700	STR_RS06140	BAY21_RS08220	CW339_RS06305	CR922_RS03265	CR921_RS06300	STH8232_RS06600	BEN15_RS09555	A9497_RS02545	STER_RS06290	STU_RS15530	AMD33_RS05215	MNA02_RS06220	Y1U_RS06225	DQL34_RS07240	STND_RS06220	BBD27_RS07805	AVT04_RS08380	SMQ301_RS06300	BGL51_RS06490
	4-hydroxy-tetrahydrodipicolinate synthase	dapA	STACADC2_RS05955	B1761_RS02095	T303_RS07310	CG712_RS02695	STR_RS06135	BAY21_RS08225	CW339_RS06300	CR922_RS03270	CR921_RS06295	STH8232_RS06595	BEN15_RS09550	A9497_RS02540	STER_RS06285	STU_RS15525	AMD33_RS05210	MNA02_RS06215	Y1U_RS06220	DQL34_RS07235	STND_RS06215	BBD27_RS07810	AVT04_RS08385	SMQ301_RS06295	BGL51_RS06485
	4-hydroxy-tetrahydrodipicolinate reductase	dapB	STACADC2_RS02165	B1761_RS07915	T303_RS03220	CG712_RS08200	STR_RS02215	BAY21_RS02685	CW339_RS02110	CR922_RS07230	CR921_RS02225	STH8232_RS02340	BEN15_RS05315	A9497_RS08225	STER_RS02260	STU_RS11710	AMD33_RS01165	MNA02_RS02140	Y1U_RS02205	DQL34_RS02500	STND_RS02260	BBD27_RS02210	AVT04_RS02765	SMQ301_RS02275	BGL51_RS02220
	2,3,4,5-tetrahydropyridine-2,6-dicarboxylate N-acetyltransferase	dapD	STACADC2_RS08335	B1761_RS04630	T303_RS00130	CG712_RS05140	STR_RS08625	BAY21_RS05735	CW339_RS08840	CR922_RS08780	CR921_RS08845	STH8232_RS09095	BEN15_RS02115	A9497_RS05045	STER_RS08865	STU_RS18020	AMD33_RS07720	MNA02_RS08745	Y1U_RS08740	DQL34_RS10200	STND_RS08730	BBD27_RS05300	AVT04_RS05890	SMQ301_RS08855	BGL51_RS08940
	acetylornithine transaminase	argD	STACADC2_RS02360	B1761_RS08115	T303_RS03420	CG712_RS08405	STR_RS02425	BAY21_RS02480	CW339_RS02320	CR922_RS07025	CR921_RS02430	STH8232_RS02545	BEN15_RS05515	A9497_RS08425	STER_RS02470	STU_RS11905	AMD33_RS01360	MNA02_RS02340	Y1U_RS02400	DQL34_RS02850	STND_RS02455	BBD27_RS02010	AVT04_RS02560	SMQ301_RS02475	BGL51_RS02425
	succinyl-diaminopimelate desuccinylase	dapE	-	-	-	-	-	-	-	-	-	-	-	-	-	-	-	-	-	-	-	-	-	-	-
	diaminopimelate epimerase	dapF	-	-	-	-	-	-	-	-	-	-	-	-	-	-	-	-	-	-	-	-	-	-	-
	diaminopimelate decarboxylase	lysA	STACADC2_RS01325	B1761_RS07040	T303_RS02420	CG712_RS07395	STR_RS01425	BAY21_RS03475	CW339_RS01295	CR922_RS08035	CR921_RS01370	STH8232_RS01530	BEN15_RS04415	A9497_RS07415	STER_RS01450	STU_RS10890	AMD33_RS00320	MNA02_RS01330	Y1U_RS01365	DQL34_RS01680	STND_RS01395	BBD27_RS03015	AVT04_RS03555	SMQ301_RS01465	BGL51_RS01425
Lysine biosynthesis (acetyl-Dap pathway)	aspartate kinase	lysC	STACADC2_RS01955	B1761_RS07670	T303_RS03040	CG712_RS07990	STR_RS02025	BAY21_RS02875	CW339_RS01930	CR922_RS07425	CR921_RS01995	STH8232_RS02160	BEN15_RS05060	A9497_RS08045	STER_RS02080	STU_RS11520	AMD33_RS00945	MNA02_RS01960	Y1U_RS01985	DQL34_RS02330	STND_RS02020	BBD27_RS02390	AVT04_RS02955	SMQ301_RS02095	BGL51_RS02050
	aspartate-semialdehyde dehydrogenase	asd	STACADC2_RS05960	B1761_RS02100	T303_RS07315	CG712_RS02700	STR_RS06140	BAY21_RS08220	CW339_RS06305	CR922_RS03265	CR921_RS06300	STH8232_RS06600	BEN15_RS09555	A9497_RS02545	STER_RS06290	STU_RS15530	AMD33_RS05215	MNA02_RS06220	Y1U_RS06225	DQL34_RS07240	STND_RS06220	BBD27_RS07805	AVT04_RS08380	SMQ301_RS06300	BGL51_RS06490
	4-hydroxy-tetrahydrodipicolinate synthase	dapA	STACADC2_RS05955	B1761_RS02095	T303_RS07310	CG712_RS02695	STR_RS06135	BAY21_RS08225	CW339_RS06300	CR922_RS03270	CR921_RS06295	STH8232_RS06595	BEN15_RS09550	A9497_RS02540	STER_RS06285	STU_RS15525	AMD33_RS05210	MNA02_RS06215	Y1U_RS06220	DQL34_RS07235	STND_RS06215	BBD27_RS07810	AVT04_RS08385	SMQ301_RS06295	BGL51_RS06485
	4-hydroxy-tetrahydrodipicolinate reductase	dapB	STACADC2_RS02165	B1761_RS07915	T303_RS03220	CG712_RS08200	STR_RS02215	BAY21_RS02685	CW339_RS02110	CR922_RS07230	CR921_RS02225	STH8232_RS02340	BEN15_RS05315	A9497_RS08225	STER_RS02260	STU_RS11710	AMD33_RS01165	MNA02_RS02140	Y1U_RS02205	DQL34_RS02500	STND_RS02260	BBD27_RS02210	AVT04_RS02765	SMQ301_RS02275	BGL51_RS02220
	tetrahydrodipicolinate N-acetyltransferase	dapH	-	-	-	-	-	-	-	-	-	-	-	-	-	-	-	-	-	-	-	-	-	-	-
	pyridoxal phosphate-dependent aminotransferase	patA	STACADC2_RS00210	B1761_RS05805	T303_RS01310	CG712_RS06230	STR_RS00225	BAY21_RS04615	CW339_RS00200	CR922_RS00210	CR921_RS00215	STH8232_RS00220	BEN15_RS03270	A9497_RS06230	STER_RS00230	STU_RS09685	AMD33_RS08900	MNA02_RS00220	Y1U_RS00225	DQL34_RS00210	STND_RS00220	BBD27_RS04115	AVT04_RS04775	SMQ301_RS00235	BGL51_RS00210
	N-acetyldiaminopimelate deacetylase	dapL	STACADC2_RS08330	B1761_RS04625	T303_RS00125	CG712_RS05135	STR_RS08620	BAY21_RS05740	CW339_RS08835	CR922_RS08775	CR921_RS08840	STH8232_RS09090	BEN15_RS02110	A9497_RS05040	STER_RS08860	STU_RS18015	AMD33_RS07715	MNA02_RS08740	Y1U_RS08735	DQL34_RS10195	STND_RS08725	BBD27_RS05305	AVT04_RS05895	SMQ301_RS08850	BGL51_RS08935
	diaminopimelate epimerase	dapF	-	-	-	-	-	-	-	-	-	-	-	-	-	-	-	-	-	-	-	-	-	-	-
	diaminopimelate decarboxylase	lysA	STACADC2_RS01325	B1761_RS07040	T303_RS02420	CG712_RS07395	STR_RS01425	BAY21_RS03475	CW339_RS01295	CR922_RS08035	CR921_RS01370	STH8232_RS01530	BEN15_RS04415	A9497_RS07415	STER_RS01450	STU_RS10890	AMD33_RS00320	MNA02_RS01330	Y1U_RS01365	DQL34_RS01680	STND_RS01395	BBD27_RS03015	AVT04_RS03555	SMQ301_RS01465	BGL51_RS01425
