# Supplementary material for: Comparative Genomics of Streptococcus thermophilus Support Important Traits Concerning the Evolution, Biology and Technological Properties of the Species
Source: Front Microbiol. 2019 Dec 20;10:2916. doi: 10.3389/fmicb.2019.02916 (PMC6951406; doi:10.3389/fmicb.2019.02916)
Supplement: Supplementary file 7 [file Table_7.XLSX]

## Sheet: TABLE S7
Supplementary Table S7. Genes involved in urea metabolism identified in the 23 S. thermophilus strains
product	gene	ACA-DC 2	ASCC 1275	CNRZ1066	JIM 8232	LMD-9	LMG 18311	MN-ZLW-002	ND03	APC151	B59671	CS8	DGCC 7710	EPS	GABA	KLDS 3.1003	KLDS SM	MN-BM-A01	MN-BM-A02	NCTC12958	ND07	S9	SMQ-301	ST3
acid-activated urea channel	ureI	STACADC2_RS01450	T303_RS02545	STR_RS01550	STH8232_RS01655	STER_RS01570	STU_RS11020	Y1U_RS01490	STND_RS01520	B1761_RS07170	CG712_RS07515	BAY21_RS03350	CW339_RS01430	CR922_RS07915	CR921_RS01490	BEN15_RS04540	A9497_RS07540	AMD33_RS00445	MNA02_RS01455	DQL34_RS01805	BBD27_RS02890	AVT04_RS03430	SMQ301_RS01585	BGL51_RS01550
urease subunit gamma	ureA	STACADC2_RS01455	T303_RS02550	STR_RS01555	STH8232_RS01660	STER_RS01575	STU_RS11025	Y1U_RS01495	STND_RS01525	B1761_RS07175	CG712_RS07520	BAY21_RS03345	CW339_RS01435	CR922_RS07910	CR921_RS01495	BEN15_RS04545	A9497_RS07545	AMD33_RS00450	MNA02_RS01460	DQL34_RS01810	BBD27_RS02885	AVT04_RS03425	SMQ301_RS01590	BGL51_RS01555
urease subunit beta	ureB	STACADC2_RS01460	T303_RS02555	STR_RS01560	STH8232_RS01665	STER_RS01580	STU_RS11030	Y1U_RS01500	STND_RS01530	B1761_RS07180	CG712_RS07525	BAY21_RS03340	CW339_RS01440	CR922_RS07905	CR921_RS01500	BEN15_RS04550	A9497_RS07550	AMD33_RS00455	MNA02_RS01465	DQL34_RS01815	BBD27_RS02880	AVT04_RS03420	SMQ301_RS01595	BGL51_RS01560
urease subunit alpha	ureC	STACADC2_RS01465	T303_RS02560	STR_RS01565	STH8232_RS01670	STER_RS01585	STU_RS11035	Y1U_RS01505	STND_RS01535	B1761_RS07185	CG712_RS07530	BAY21_RS03335	CW339_RS01445	CR922_RS07900	CR921_RS01505	BEN15_RS04555	A9497_RS07555	AMD33_RS00460	MNA02_RS01470	DQL34_RS01820	BBD27_RS02875	AVT04_RS03415	SMQ301_RS01600	BGL51_RS01565
urease accessory protein UreE	ureE	STACADC2_RS01470	T303_RS02565	STR_RS01570	STH8232_RS01675	STER_RS01590	STU_RS11040	Y1U_RS01510	STND_RS01540	B1761_RS07190	CG712_RS07535	BAY21_RS03330	CW339_RS01450	CR922_RS07895	CR921_RS01510	BEN15_RS04560	A9497_RS07560	AMD33_RS00465	MNA02_RS01475	DQL34_RS01825	BBD27_RS02870	AVT04_RS03410	SMQ301_RS01605	BGL51_RS01570
urease accessory protein UreF	ureF	STACADC2_RS01475	T303_RS02570	STR_RS01575	STH8232_RS01680	STER_RS01595	STU_RS11045	Y1U_RS01515	STND_RS01545	B1761_RS07195	CG712_RS07540	BAY21_RS03325	CW339_RS01455	CR922_RS07890	CR921_RS01515	BEN15_RS04565	A9497_RS07565	AMD33_RS00470	MNA02_RS01480	DQL34_RS01830	BBD27_RS02865	AVT04_RS03405	SMQ301_RS01610	BGL51_RS01575
urease accessory protein UreG	ureG	STACADC2_RS01480	T303_RS02575	STR_RS01580	STH8232_RS01685	STER_RS01600	STU_RS11050	Y1U_RS01520	STND_RS01550	B1761_RS07200	CG712_RS07545	BAY21_RS03320	CW339_RS01460	CR922_RS07885	CR921_RS01520	BEN15_RS04570	A9497_RS07570	AMD33_RS00475	MNA02_RS01485	DQL34_RS01835	BBD27_RS02860	AVT04_RS03400	SMQ301_RS01615	BGL51_RS01580
urease accessory protein UreD	ureD	STACADC2_RS01485	T303_RS02580	STR_RS01585	STH8232_RS01690	STER_RS01605	STU_RS11055	Y1U_RS01525	STND_RS01555	B1761_RS07205	CG712_RS07550	BAY21_RS03315	CW339_RS01465	CR922_RS07880	CR921_RS01525	BEN15_RS04575	A9497_RS07575	AMD33_RS00480	MNA02_RS01490	DQL34_RS01840	BBD27_RS02855	AVT04_RS03395	SMQ301_RS01620	BGL51_RS01585
cobalt transporter CbiM	ureM	STACADC2_RS01490	T303_RS02585	STR_RS01590	STH8232_RS01695	STER_RS01610	STU_RS11060	Y1U_RS01530	STND_RS01560	B1761_RS07210	CG712_RS07555	BAY21_RS03310	CW339_RS01470	CR922_RS07875	CR921_RS01530	BEN15_RS04580	A9497_RS07580	AMD33_RS00485	MNA02_RS01495	DQL34_RS01845	BBD27_RS02850	AVT04_RS03390	SMQ301_RS01625	BGL51_RS01590
cobalt ABC transporter permease	ureQ	STACADC2_RS01495	T303_RS02590	STR_RS01595	STH8232_RS01700	STER_RS01615	STU_RS11065	Y1U_RS01535	STND_RS01565	B1761_RS07215	CG712_RS07560	BAY21_RS03305	CW339_RS01475	CR922_RS07870	CR921_RS01535	BEN15_RS04585	A9497_RS07585	AMD33_RS00490	MNA02_RS01500	DQL34_RS01850	BBD27_RS02845	AVT04_RS03385	SMQ301_RS01630	BGL51_RS01595
ABC transporter ATP-binding protein	ureO	STACADC2_RS01500	T303_RS02595	STR_RS01600	STH8232_RS01705	STER_RS01620	STU_RS11070	Y1U_RS01540	STND_RS01570	B1761_RS07220	CG712_RS07565	BAY21_RS03300	CW339_RS01480	CR922_RS07865	CR921_RS01540	BEN15_RS04590	A9497_RS07590	AMD33_RS00495	MNA02_RS01505	DQL34_RS01855	BBD27_RS02840	AVT04_RS03380	SMQ301_RS01635	BGL51_RS01600
