# Supplementary material for: Comparative Genomics of Streptococcus thermophilus Support Important Traits Concerning the Evolution, Biology and Technological Properties of the Species
Source: Front Microbiol. 2019 Dec 20;10:2916. doi: 10.3389/fmicb.2019.02916 (PMC6951406; doi:10.3389/fmicb.2019.02916)
Supplement: Supplementary file 9 [file Table_9.XLSX]

## Sheet: TABLE S9A
Supplementary Table S9A. Clustered Regularly Interspaced Short Palindromic Repeats-CRISPR associated (CRISPR-Cas) system types and CRISPR-Cas genes identified in the 23 S. thermophilus strains. Genes highlighted in red correspond to putative pseudogenes while genes highlighted in blue are truncated
CRISPR-Cas system type		ACA-DC 2	APC151	ASCC 1275	B59671	CNRZ1066	CS8	DGCC 7710	EPS	GABA	JIM 8232	KLDS 3.1003	KLDS SM	LMD-9	LMG 18311	MN-BM-A01	MN-BM-A02	MN-ZLW-002	NCTC12958	ND03	ND07	S9	SMQ-301	ST3
CRISPR1 (Class 2 / II-A)	coordinates of CRISPR array	-	1689194.. 1691603	823246..825392	1815698..1816920	625101..627844	287797..290540	636570..638716	1136592..1137352	652778..655449	712332..715137	1254932..1255890	1806995..1809141	649125..650217	629901..632113	443838..445850	633203..635349	630165..632177	803250..805592	639512..641921	177242..179388	304100..305059	649756..650847	652775..653929
	type II CRISPR RNA-guided endonuclease Cas9	STACADC2_RS03320	B1761_RS09095	T303_RS04490	CG712_RS09600	STR_RS03365	BAY21_RS01550	CW339_RS03425	CR922_RS06085	CR921_RS03475	STH8232_RS03750	BEN15_RS06675	A9497_RS09510	STER_RS03490	STU_RS12835	AMD33_RS02300	MNA02_RS03410	Y1U_RS03345	DQL34_RS04340	STND_RS03420	BBD27_RS00925	AVT04_RS01630	SMQ301_RS03470	BGL51_RS03460
	subtype II CRISPR-associated endonuclease Cas1	STACADC2_RS03325	B1761_RS09100	T303_RS04495	CG712_RS09605	STR_RS03370	BAY21_RS01545	CW339_RS03430	CR922_RS06080	CR921_RS03480	STH8232_RS03755	BEN15_RS06680	A9497_RS09515	STER_RS03495	STU_RS12840	AMD33_RS02305	MNA02_RS03415	Y1U_RS03350	DQL34_RS04345	STND_RS03425	BBD27_RS00920	AVT04_RS01625	SMQ301_RS03475	BGL51_RS03465
	CRISPR-associated endonuclease Cas2	STACADC2_RS03330	B1761_RS09105	T303_RS04500	CG712_RS09610	STR_RS03375	BAY21_RS01540	CW339_RS03435	CR922_RS06075	CR921_RS03485	STH8232_RS03760	BEN15_RS06685	A9497_RS09520	STER_RS03500	STU_RS12845	AMD33_RS02310	MNA02_RS03420	Y1U_RS03355	DQL34_RS04350	STND_RS03430	BBD27_RS00915	AVT04_RS01620	SMQ301_RS03480	BGL51_RS03470
	CRISPR-associated protein Csn2	STACADC2_RS03335	B1761_RS09110	T303_RS04505	CG712_RS09615	STR_RS03380	BAY21_RS01535	CW339_RS03440	CR922_RS06070	CR921_RS03490	STH8232_RS03765	BEN15_RS06690	A9497_RS09525	STER_RS03505	STU_RS12850	AMD33_RS02315	MNA02_RS03425	Y1U_RS03360	DQL34_RS04355	STND_RS03435	BBD27_RS00910	AVT04_RS01615	SMQ301_RS03485	BGL51_RS03475
CRISPR2 (Class 1 / III-A)*	coordinates of CRISPR array	849603..849704	85936..86037	1074866..1075124	-	-	-	887984..888242	896474..896575	889434..889684	969817..971087	1506836..1507597	199829..200087	897070..897328	863999..864323	719325..719426	884614..884872	905670..905771	-	873997..874098	1779078..1779330	70568..70669	897843..898101	914332..914582
	CRISPR-associated endonuclease Cas1	STACADC2_RS04550	B1761_RS00500	T303_RS05790	CG712_RS01090	STR_RS04695	BAY21_RS00240	CW339_RS04755	CR922_RS04745	CR921_RS04685	STH8232_RS05055	BEN15_RS07965	A9497_RS01025	STER_RS04790	STU_RS14035	AMD33_RS03795	MNA02_RS04700	Y1U_RS04810	-	STND_RS04630	BBD27_RS09325	AVT04_RS00360	SMQ301_RS04770	BGL51_RS04890
	CRISPR-associated endonuclease Cas2	STACADC2_RS04555	B1761_RS00505	T303_RS05795	CG712_RS01095	STR_RS04705	BAY21_RS00230	CW339_RS04760	CR922_RS04740	CR921_RS04690	STH8232_RS05060	BEN15_RS07970	A9497_RS01030	STER_RS04795	STU_RS14045	AMD33_RS03790	MNA02_RS04705	Y1U_RS04805	-	STND_RS04635	BBD27_RS09320	AVT04_RS00350	SMQ301_RS04775	BGL51_RS04895
	CRISPR-associated endoribonuclease Cas6	STACADC2_RS04560	B1761_RS00510	T303_RS05800	CG712_RS01100	-	-	CW339_RS04765	CR922_RS04735	-	STH8232_RS05065	BEN15_RS07975	A9497_RS01035	STER_RS04800	STU_RS14050	AMD33_RS03785	MNA02_RS04710	Y1U_RS04800	-	STND_RS04640	BBD27_RS09315	AVT04_RS00345	SMQ301_RS04780	-
	type III-A CRISPR-associated protein Cas10/Csm1	STACADC2_RS04565	B1761_RS00515	T303_RS05805	CG712_RS01105	-	-	CW339_RS04770	CR922_RS04730	-	STH8232_RS05070	BEN15_RS07980	A9497_RS01040	STER_RS04805	STU_RS14055	AMD33_RS03780	MNA02_RS04715	Y1U_RS04795	-	STND_RS04645	BBD27_RS09310	AVT04_RS00340	SMQ301_RS10100	-
	type III-A CRISPR-associated protein Csm2	-	B1761_RS00520	T303_RS05810	CG712_RS01110	STR_RS09985	BAY21_RS09445	CW339_RS04775	CR922_RS04725	-	-	-	A9497_RS01045	STER_RS04810	STU_RS14060	AMD33_RS03775	MNA02_RS04720	Y1U_RS04790	-	STND_RS04650	BBD27_RS09305	AVT04_RS00335	SMQ301_RS04790	-
	type III-A CRISPR-associated protein Csm2	STACADC2_RS04570	-	-	-	-	-	-	-	-	STH8232_RS05075	BEN15_RS07985	-	-	-	-	-	-	-	-	-	-	-	-
	type III-A CRISPR-associated RAMP protein Csm3	STACADC2_RS04575	B1761_RS00525	T303_RS05815	CG712_RS01115	STR_RS04710	BAY21_RS00225	CW339_RS04780	CR922_RS04720	-	STH8232_RS05080	BEN15_RS07990	A9497_RS01050	STER_RS04815	STU_RS14065	AMD33_RS03770	MNA02_RS04725	Y1U_RS04785	-	STND_RS04655	BBD27_RS09300	AVT04_RS00330	SMQ301_RS04795	-
	type III-A CRISPR-associated RAMP protein Csm4	STACADC2_RS04580	B1761_RS00530	T303_RS05820	CG712_RS01120	STR_RS04715	BAY21_RS00220	CW339_RS04785	CR922_RS04715	-	STH8232_RS05085	BEN15_RS07995	A9497_RS01055	STER_RS04820	STU_RS14070	AMD33_RS03765	MNA02_RS04730	Y1U_RS04780	-	STND_RS04660	BBD27_RS09295	AVT04_RS00325	SMQ301_RS04800	-
	type III-A CRISPR-associated RAMP protein Csm5	STACADC2_RS04585	B1761_RS00535	T303_RS05825	CG712_RS01125	STR_RS04720	BAY21_RS00215	CW339_RS04790	CR922_RS04710	-	STH8232_RS05090	BEN15_RS08000	A9497_RS01060	STER_RS04825	STU_RS14075	AMD33_RS03760	MNA02_RS04735	Y1U_RS04775	-	STND_RS04665	BBD27_RS09290	AVT04_RS00320	SMQ301_RS04805	-
	type III-A CRISPR-associated protein Csm6	STACADC2_RS04590	-	-	-	-	-	-	-	CR921_RS04825	STH8232_RS05095	-	-	-	-	-	-	-	-	-	-	-	-	BGL51_RS05025
	hypothetical protein	-	-	-	-	-	-	-	-	-	-	-	-	-	STU_RS14080	-	-	-	-	-	-	-	-	-
	type III-A CRISPR-associated protein Csm6	-	-	-	-	-	-	-	-	CR921_RS04830	STH8232_RS05100	-	-	-	-	-	-	-	-	-	-	-	-	BGL51_RS05030
	type III-A CRISPR-associated protein Csm6	-	B1761_RS00540	T303_RS05830	CG712_RS01130	STR_RS04725	BAY21_RS00210	CW339_RS04795	CR922_RS04705	-	-	BEN15_RS08005	A9497_RS01065	STER_RS04830	STU_RS14085	AMD33_RS03755	MNA02_RS04740	Y1U_RS04770	-	STND_RS04670	BBD27_RS09285	AVT04_RS00315	SMQ301_RS10105	-
CRISPR3 (Class 2 / II-A)	coordinates of CRISPR array	-	575011.. 576303	1558841..1559668	-	-	-	1371965..1372792	-	1396122..1397147	-	121258..122019	683810..684637	1377229..1377794	-	1186347..1188099	1368586..1369413	1372720..1374472	1568082..1569571	1363057..1364415	1294523..1295350	-	1383838..1384867	1399223..1400777
	type II-A CRISPR-associated protein Csn2	-	B1761_RS03065	T303_RS08255	-	-	-	CW339_RS07265	-	CR921_RS07345	-	BEN15_RS00605	A9497_RS03470	STER_RS07245	-	AMD33_RS06155	MNA02_RS07160	Y1U_RS07175	DQL34_RS08310	STND_RS07165	BBD27_RS06880	-	SMQ301_RS07230	BGL51_RS07450
	CRISPR-associated endonuclease Cas2	-	B1761_RS03070	T303_RS08260	-	-	-	CW339_RS07270	-	CR921_RS07350	-	BEN15_RS00610	A9497_RS03475	STER_RS07250	-	AMD33_RS06160	MNA02_RS07165	Y1U_RS07180	DQL34_RS08315	STND_RS07170	BBD27_RS06875	-	SMQ301_RS07235	BGL51_RS07455
	subtype II CRISPR-associated endonuclease Cas1	-	B1761_RS03075	T303_RS08265	-	-	-	CW339_RS07275	-	CR921_RS07355	-	BEN15_RS00615	A9497_RS03480	STER_RS07255	-	AMD33_RS06165	MNA02_RS07170	Y1U_RS07185	DQL34_RS08320	STND_RS07175	BBD27_RS06870	-	SMQ301_RS07240	BGL51_RS07460
	type II CRISPR RNA-guided endonuclease Cas9	-	B1761_RS03080	T303_RS08270	-	-	-	CW339_RS07280	-	CR921_RS07360	-	BEN15_RS00620	A9497_RS03485	STER_RS07260	-	AMD33_RS06170	MNA02_RS07175	Y1U_RS07190	DQL34_RS08325	STND_RS07180	BBD27_RS06865	-	SMQ301_RS07245	BGL51_RS07465
CRISPR4 (Class 1 / I-E)	coordinates of CRISPR array	-	-	1144778..1145540	295226..295498	-	-	957897..958659	-	-	-	-	269742..270504	-	-	-	954527..955289	-	-	-	1708655..1709417	-	-	-
	type I-E CRISPR-associated endoribonuclease Cas2	-	-	T303_RS06145	CG712_RS01545	-	-	CW339_RS05115	-	-	-	-	A9497_RS01385	-	-	-	MNA02_RS05055	-	-	-	BBD27_RS08965	-	-	-
	subtype I-E CRISPR-associated endonuclease Cas1	-	-	T303_RS06150	CG712_RS01550	-	-	CW339_RS05120	-	-	-	-	A9497_RS01390	-	-	-	MNA02_RS05060	-	-	-	BBD27_RS08960	-	-	-
	type I-E CRISPR-associated protein Cas6/Cse3/CasE	-	-	T303_RS06155	CG712_RS01555	-	-	CW339_RS05125	-	-	-	-	A9497_RS01395	-	-	-	MNA02_RS05065	-	-	-	BBD27_RS08955	-	-	-
	type I-E CRISPR-associated protein Cas5/CasD	-	-	T303_RS06160	CG712_RS01560	-	-	CW339_RS05130	-	-	-	-	A9497_RS01400	-	-	-	MNA02_RS05070	-	-	-	BBD27_RS08950	-	-	-
	type I-E CRISPR-associated protein Cas7/Cse4/CasC	-	-	T303_RS06165	CG712_RS01565	-	-	CW339_RS05135	-	-	-	-	A9497_RS01405	-	-	-	MNA02_RS05075	-	-	-	BBD27_RS08945	-	-	-
	type I-E CRISPR-associated protein Cse2/CasB	-	-	T303_RS06170	CG712_RS01570	-	-	CW339_RS05140	-	-	-	-	A9497_RS01410	-	-	-	MNA02_RS05080	-	-	-	BBD27_RS08940	-	-	-
	CRISPR-associated protein Cse1/Cas8e/CasA	-	-	T303_RS06175	CG712_RS01575	-	-	CW339_RS05145	-	-	-	-	A9497_RS01415	-	-	-	MNA02_RS05085	-	-	-	BBD27_RS08935	-	-	-
	CRISPR-associated helicase/endonuclease Cas3	-	-	T303_RS06180	CG712_RS01580	-	-	CW339_RS05150	-	-	STH8232_RS05405	-	A9497_RS01420	-	-	-	MNA02_RS05090	-	-	-	BBD27_RS08930	-	SMQ301_RS05125	-
*CRISPR2 systems highlighted in green correspond to possible CRISPRs as identified by CRISPRFinder and contain only 1 spacer between two repeats

## Sheet: TABLE S9B
Supplementary Table S9B. Blastn analysis of the spacers of the various Clustered Regularly Interspaced Short Palindromic Repeats-CRISPR associated (CRISPR-Cas) systems predicted in the 23 S. thermophilus strains
Spacers of CRISPR1
Strain (coordinates of CRISPR array)	spacers	1st blastn result (excluding same species)
LMG 18311 (629901..632113)	>spacer1
	GAGCTACCAGCTACCCCGTATGTCAGAGAG	Streptococcus thermophilus bacteriophage 7201
	>spacer2
	CGTTCCTTTTTTCAAGGTAATCTTTGAAAG
	>spacer3
	AAGTCCGTAAGCACCAGTTCCAATCGTCAT	Streptococcus phage D4276
	>spacer4
	TTGAATACCAATGCCAGCTTCTTTTAAGGC	Streptococcus phages: 9A / P9854 / P9851 / P8922 / P8921 / P7574 / P7154 / P7152 / P7151 / P7134 / P7133 / P5652 / P5651 / P3681 / P0094 / P0093 / P0092 / CHPC1151 / CHPC926 / 5093
	>spacer5
	AACCTCATACATGGGGAAAATTGGTAAGTA	Streptococcus phage D4276
	>spacer6
	TAACTTCATTAGTGTAGTTGTAATTAGCAT
	>spacer7
	TTAGCTACCCAAATATCTTCTGTTTTCCAA	Streptococcus phage D4276
	>spacer8
	GAGTTTTCAATATTGGCACAGGAGACAATT
	>spacer9
	TGATACTATTTTAGTCAGATATGAAATATC
	>spacer10
	TCATCAATGTTTAAAGCCCAACAATACATGA
	>spacer11
	TAGATTTAATCAGTAATGAGTTAGGCATAA	Streptococcus phages: M19 / vB_SthS_VA214 / P4761 / TP-778L / Abc2
	>spacer12
	AGGAAAATAGCATGAGCGTACAACAATCTA	Streptococcus phage P5652
	>spacer13
	TGTCTATCACGCTTCCTAAGTGCATGAAAA	Streptococcus thermophilus bacteriophages: Sfi11 / 7201 / Sfi21 / Sfi19
	>spacer14
	ATGTCACCAATCACTAAAGAACCTACGCTG	Streptococcus phages: phiARI0468b-3 / TP-778L / TP-J34; Streptococcus thermophilus bacteriophage Sfi11
	>spacer15
	AACATCTTCCTCTCCGATTGCAAATAGTGC	Streptococcus phages: STP2 / STP1 / L5A1 / C0 / B5 / B0 / 7A5 / A0 / vB_SthS_VA214 / P4761
	>spacer16
	CATATTTGGTGCCCGTTCGATAAAGAGTA	Streptococcus thermophilus bacteriophage Sfi21
	>spacer17
	CATTAAATCGCTTGAAGCAGACATTGAAGC	Streptococcus phage MM25
	>spacer18
	GACTTATCTTGGAAGGTAGTGAAGGCACTT
	>spacer19
	TCCTTGCCATCTGCACTGTAAGCCCAAGCA	Streptococcus thermophilus bacteriophage Sfi11
	>spacer20
	TAGTACGCATAATCAATTCATCAAGCTTGA
	>spacer21
	GTAGTGACCCAAAATTCTATGACCTTGAAA	Streptococcus thermophilus bacteriophage Sfi21
	>spacer22
	AGATTGTGGTGCTTACGGAAAATTCCTTGT	Streptococcus phage P9903
	>spacer23
	TGGCAAGAAGTGTAAGAGATGCAATGGATA	Streptococcus thermophilus bacteriophage O1205
	>spacer24
	TTTATTATCATTATTCTTCTTCCCAAGCGT
	>spacer25
	TTTTATAGAATTTGGTGGTGAACTTTTTCA
	>spacer26
	AATGGGTCACAGATTGCCATAATAAGGAG
	>spacer27
	CCGAGGTCACTTTAGAACCCACAAAATAAG	Streptococcus thermophilus bacteriophage Sfi19
	>spacer28
	ATGAGAGAACACAGTATAGACCCTGATACA	Streptococcus phage vB_SthS_VA214; Streptococcus thermophilus bacteriophages: 7201 / Sfi19
	>spacer29
	CAGTATTAATGAGGTTTGGGTGGTCATTCC	Streptococcus phages: P7602 / P7601 / P7572 / P7571 / P5641 / P4761 / 73
	>spacer30
	CCATACTCTCTATCAGTTCATTTAATTCTTC
	>spacer31
	TAATATGTCGCTCTACTGATTCCAAAACGG
	>spacer32
	ATGAATTACATTCATGATTTTATCGAGTTT
	>spacer33
	CGTGCCATTGTTTCGGTCGGACGTGGGCA	Streptococcus phage P5652
EPS (1136592..1137352) (rev_com)	>spacer1
	CGTGCCATTGTTTCGGTCGGACGTGGGCA	Streptococcus phage P5652
	>spacer2
	ATGAGAGAACACAGTATAGACCCTGATACA	Streptococcus phage vB_SthS_VA214; Streptococcus thermophilus bacteriophage 7201 / Sfi19
	>spacer3
	CCGAGGTCACTTTAGAACCCACAAAATAAG	Streptococcus thermophilus bacteriophage Sfi19
	>spacer4
	AATGGGTCACAGATTGCCATAATAAGGAGG
	>spacer5
	TTTTATAGAATTTGGTGGTGAACTTTTTCA
	>spacer6
	TTTATTATCATTATTCTTCTTCCCAAGCGT
	>spacer7
	TGGCAAGAAGTGTAAGAGATGCAATGGATA	Streptococcus thermophilus bacteriophage O1205
	>spacer8
	AGATTGTGGTGCTTACGGAAAATTCCTTGT	Streptococcus phage P9903
	>spacer9
	GTAGTGACCCAAAATTCTATGACCTTGAAA	Streptococcus thermophilus bacteriophage Sfi21
	>spacer10
	TAGTACGCATAATCAATTCATCAAGCTTGA
	>spacer11
	TAATTCTTTCAGGTATGAAACTAGAAACAC
S9 (304100..305059) (rev_com)	>spacer1
	CTTTCTAAGTTGAATTAAATTCAAGTTTTG	Streptococcus phages: TP-778L / TP-J34
	>spacer2
	TCGCTACTATGGTTAACGATGAGGAACTCT	Streptococcus phages: P4761 / 73 / TP-778L / TP-J34
	>spacer3
	AGCAACTTTAAAACTAAAAGAGCTACTTGA	Streptococcus thermophilus bacteriophage Sfi19
	>spacer4
	CAGTATTAATGAGGTTTGGGTGGTCATTCC	Streptococcus phages: P7602 / P7601 / P7572 / P7571 / P5641 / P4761 / 73
	>spacer5
	CCATACTCTCTATCAGTTCATTTAATTCTTC
	>spacer6
	TGAGAGTGTCTGATGGATTTATTGGTAACC	Streptococcus thermophilus bacteriophages: Sfi21 / Sfi19
	>spacer7
	ACCTCATACATGGGGAAAACTTGTAAGTA	Streptococcus phage D4276
	>spacer8
	TATTTCACGAATTTCTACACTTTTCAACCT
	>spacer9
	CTGAAACCTTGTTTTGAAGCGCTTGGAAGT	Streptococcus phage TP-J34
	>spacer10
	GTCAATTGATACTGCAATCTCTTTAACATT
	>spacer11
	ACTTCAATATGGTCAACATCTTGATCACCGA
	>spacer12
	TAATATGTCGCTCTACTGATTCCAAAACGG
	>spacer13
	ATGAATTACATTCATGATTTTATCGAGTTT
	>spacer14
	CGTGCCATTGTTTCGGTCGGACGTGGGCA	Streptococcus phage P5652
CNRZ1066 (625101..627844)	>spacer1
	AGAACGTATTCCAAAACCTCTTTACGATTA	Streptococcus phages: V2 / R1 / MM25 / 31B4 / 16B8 / 9B4 / 9A / 7T / P9854 / P9853 / P9852 / P9851 / P8922 / P8921 / P7954 / P7953 / P7952 / P7633 / P7632 / P7631 / P7602 / P7601 / P7573 / P7572 / P7571 / P7154 / P7152 / P7151 / P7134 / P7133 / P7132 / P5652 / P5651 / P3684 / P3681 / 128 / 53 / CHPC577 / ALQ13.2 / vB_SthS_VA460 / vB_SthS_VA698; Streptococcus thermophilus bacteriophages: kappa3 / …
	>spacer2
	TTAACTGTTATCAAAATGATAAGATAGTCT
	>spacer3
	CGTTGATGTTTATTCAAGTAAAATAATTAA	Streptococcus thermophilus temperate bacteriophage O1205
	>spacer4
	TCCTTTCACGGGTAGCACACTAACATACAC
	>spacer5
	GTTGGCAATGCAAACAACCTTTATGAACCG	Streptococcus phage TP-J34; Streptococcus thermophilus bacteriophage Sfi11
	>spacer6
	TTTATTTCCTTGCGATAACGTTCCACCTTT	Streptococcus phage TP-J34; Streptococcus thermophilus bacteriophages: Sfi11 / O1205
	>spacer7
	AGATTATAAGGAACACAACCAACTATATAG
	>spacer8
	ACGACATCAAGCTGATTGTCTTCTACATAA	Streptococcus phages: STP1 / B5 / P9902 / 73; Streptococcus thermophilus bacteriophage DT1
	>spacer9
	TTTGGAATACTGAATGTTTTACTGAAAATC
	>spacer10
	ACACCACTATCTTTTCCTCCTGAAAATGAA
	>spacer11
	GTAATTCCACGAAATTATCAACCTTATGCA	Streptococcus phage P9903 / P5641 / P4761 / D4276 / 73; Streptococcus thermophilus bacteriophages: DT1 / Sfi21
	>spacer12
	TTGGAGGATTGCCCCATATTCCCAAGAGT
	>spacer13
	GAGAGGCGTTAAATATAGAAATGCAAGATT	Streptococcus phage vB_SthS_VA698; Streptococcus thermophilus temperate bacteriophage O1205
	>spacer14
	TTTTAACGTCATCAGTCCACCGCCTTAAAT
	>spacer15
	CACCTCTTTCGATGGAAAGGTATCCTTCTA	Streptococcus phage vB_SthS_VA460
	>spacer16
	GACCAAAGTTTGATTATAGAGCTATACACC
	>spacer17
	ACCATCATTCTTACCATTACAACTGTAATG	Streptococcus thermophilus bacteriophages: Sfi21 / Sfi19
	>spacer18
	ATACGAATTCGGTTCGCACAATTACAATTC
	>spacer19
	TATCAACGCAATCATTACAACAACTTCAAACA
	>spacer20
	ATCTACGTGTCAATACATATCACAAAACAG	Streptococcus phages: P7954 / pC2S4; Streptococcus thermophilus bacteriophage Sfi11
	>spacer21
	ATTTTTAGAAATTTCTGATATAATAATGA
	>spacer22
	TTGTTGGAACAAGGACGACTTGGTAAACTA	Streptococcus virus 9874
	>spacer23
	CATATTAAGCTGACTGGGCCTAATGCTTTT	Streptococcus phages: P9854 / P9852 / P9851 / 858 / TP-778L; Lactococcus phages: AM5 / AM4; Streptococcus thermophilus bacteriophages: 2972 / O1205
	>spacer24
	TTCATAGCATACCGTAGTTGTAAAATCTAT
	>spacer25
	AACATTTAGGGAATGAAATTGATAAGACTG	Streptococcus thermophilus bacteriophages: Sfi21 / Sfi19
	>spacer26
	AACATGAGAAACTGTAGAAAACAAGCAATA
	>spacer27
	TGGTGAAGATGGCAGTCATAAATGGCACATT	Streptococcus phages: vB_SthS_VA214 / P9851 / P0091
	>spacer28
	AAGGGTTGAAAAATGTTGGTATATCAAACG	Streptococcus phages: V2 / R1 / L5A1 / C0 / 31B4 / 9B4 / A0 / P7633 / P7632 / P7631 / P7574
	>spacer29
	TTCTGGTAGTGGATTTAGTCAAACAGATGT	Streptococcus phages: P7955 / P7954 / P7953 / P7952; Streptococcus thermophilus bacteriophage Sfi11
	>spacer30
	TCCATAGAGCGTCTTAAACAAAGAATAGTC
	>spacer31
	GTTGGCAATGCAAACAACCTTTATGAACCG	Streptococcus phage TP-J34; Streptococcus thermophilus bacteriophage Sfi11
	>spacer32
	CATATTAAGCTGACTGGGCCTAATGCTTTT	Streptococcus phages: P9854 / P9852 / P9851 / 858 / TP-778L; Lactococcus phages: AM5 / AM4; Streptococcus thermophilus bacteriophages: 2972 / O1205
	>spacer33
	TTCATAGCATACCGTAGTTGTAAAATCTAT
	>spacer34
	AACATTTAGGGAATGAAATTGATAAGACTG	Streptococcus thermophilus bacteriophages: Sfi21 / Sfi19
	>spacer35
	AACATGAGAAACTGTAGAAAACAAGCAATA
	>spacer36
	TGGTGAAGATGGCAGTCATAAATGGCACATT	Streptococcus phages: vB_SthS_VA214 / P9851 / P0091
	>spacer37
	TTATGATTGAATGACATGGTTGTATAAGTA	Streptococcus phages: P9854 / P9852 / P9851 / TP-778L / 858; Streptococcus thermophilus bacteriophage 2972
	>spacer38
	TTTCTTTAGGAATACCAGGGAGTTCAGCTT	Enterococcus faecium HB6 plasmid pAR6 / Enterococcus faecium JH95 plasmid pJS33 / Enterococcus faecium plasmid pEFR
	>spacer39
	TGGCAGAGATTACACAGCAACGGAAACAGC	Streptococcus pneumoniae Hu15 plasmid pSpn / Streptococcus pneumoniae Hu17 plasmid pSpn / Streptococcus pneumoniae pSpnP1 plasmid
	>spacer40
	GGGTATCATTGTATCTAGTGATGGACCTGA
	>spacer41
	ATTTGAAAAATGCACAACAGCGTTTGATAG	Streptococcus phage TP-J34
CS8 (287797..290540) (rev_com)	>spacer1
	AGAACGTATTCCAAAACCTCTTTACGATTA	Streptococcus phages: V2 / R1 / MM25 / 31B4 / 16B8 / 9B4 / 9A / 7T / P9854 / P9853 / P9852 / P9851 / P8922 / P8921 / P7954 / P7953 / P7952 / P7633 / P7632 / P7631 / P7602 / P7601 / P7573 / P7572 / P7571 / P7154 / P7152 / P7151 / P7134 / P7133 / P7132 / P5652 / P5651 / P3684 / P3681 / 128 / 53 / CHPC577 / ALQ13.2 / vB_SthS_VA460 / vB_SthS_VA698; Streptococcus thermophilus bacteriophages: kappa3 / …
	>spacer2
	TTAACTGTTATCAAAATGATAAGATAGTCT
	>spacer3
	CGTTGATGTTTATTCAAGTAAAATAATTAA	Streptococcus thermophilus temperate bacteriophage O1205
	>spacer4
	TCCTTTCACGGGTAGCACACTAACATACAC
	>spacer5
	GTTGGCAATGCAAACAACCTTTATGAACCG	Streptococcus phage TP-J34; Streptococcus thermophilus bacteriophage Sfi11
	>spacer6
	TTTATTTCCTTGCGATAACGTTCCACCTTT	Streptococcus phage TP-J34; Streptococcus thermophilus bacteriophages: Sfi11 / O1205
	>spacer7
	AGATTATAAGGAACACAACCAACTATATAG
	>spacer8
	ACGACATCAAGCTGATTGTCTTCTACATAA	Streptococcus phages: STP1 / B5 / P9902 / 73; Streptococcus thermophilus bacteriophage DT1
	>spacer9
	TTTGGAATACTGAATGTTTTACTGAAAATC
	>spacer10
	ACACCACTATCTTTTCCTCCTGAAAATGAA
	>spacer11
	GTAATTCCACGAAATTATCAACCTTATGCA	Streptococcus phage P9903 / P5641 / P4761 / D4276 / 73; Streptococcus thermophilus bacteriophages: DT1 / Sfi21
	>spacer12
	TTGGAGGATTGCCCCATATTCCCAAGAGT
	>spacer13
	GAGAGGCGTTAAATATAGAAATGCAAGATT	Streptococcus phage vB_SthS_VA698; Streptococcus thermophilus temperate bacteriophage O1205
	>spacer14
	TTTTAACGTCATCAGTCCACCGCCTTAAAT
	>spacer15
	CACCTCTTTCGATGGAAAGGTATCCTTCTA	Streptococcus phage vB_SthS_VA460
	>spacer16
	GACCAAAGTTTGATTATAGAGCTATACACC
	>spacer17
	ACCATCATTCTTACCATTACAACTGTAATG	Streptococcus thermophilus bacteriophages: Sfi21 / Sfi19
	>spacer18
	ATACGAATTCGGTTCGCACAATTACAATTC
	>spacer19
	TATCAACGCAATCATTACAACAACTTCAAACA
	>spacer20
	ATCTACGTGTCAATACATATCACAAAACAG	Streptococcus phages: P7954 / pC2S4; Streptococcus thermophilus bacteriophage Sfi11
	>spacer21
	ATTTTTAGAAATTTCTGATATAATAATGA
	>spacer22
	TTGTTGGAACAAGGACGACTTGGTAAACTA	Streptococcus virus 9874
	>spacer23
	CATATTAAGCTGACTGGGCCTAATGCTTTT	Streptococcus phages: P9854 / P9852 / P9851 / 858 / TP-778L; Lactococcus phages: AM5 / AM4; Streptococcus thermophilus bacteriophages: 2972 / O1205
	>spacer24
	TTCATAGCATACCGTAGTTGTAAAATCTAT
	>spacer25
	AACATTTAGGGAATGAAATTGATAAGACTG	Streptococcus thermophilus bacteriophages: Sfi21 / Sfi19
	>spacer26
	AACATGAGAAACTGTAGAAAACAAGCAATA
	>spacer27
	TGGTGAAGATGGCAGTCATAAATGGCACATT	Streptococcus phages: vB_SthS_VA214 / P9851 / P0091
	>spacer28
	AAGGGTTGAAAAATGTTGGTATATCAAACG	Streptococcus phages: V2 / R1 / L5A1 / C0 / 31B4 / 9B4 / A0 / P7633 / P7632 / P7631 / P7574
	>spacer29
	TTCTGGTAGTGGATTTAGTCAAACAGATGT	Streptococcus phages: P7955 / P7954 / P7953 / P7952; Streptococcus thermophilus bacteriophage Sfi11
	>spacer30
	TCCATAGAGCGTCTTAAACAAAGAATAGTC
	>spacer31
	GTTGGCAATGCAAACAACCTTTATGAACCG	Streptococcus phage TP-J34; Streptococcus thermophilus bacteriophage Sfi11
	>spacer32
	CATATTAAGCTGACTGGGCCTAATGCTTTT	Streptococcus phages: P9854 / P9852 / P9851 / 858 / TP-778L; Lactococcus phages: AM5 / AM4; Streptococcus thermophilus bacteriophages: 2972 / O1205
	>spacer33
	TTCATAGCATACCGTAGTTGTAAAATCTAT
	>spacer34
	AACATTTAGGGAATGAAATTGATAAGACTG	Streptococcus thermophilus bacteriophages: Sfi21 / Sfi19
	>spacer35
	AACATGAGAAACTGTAGAAAACAAGCAATA
	>spacer36
	TGGTGAAGATGGCAGTCATAAATGGCACATT	Streptococcus phages: vB_SthS_VA214 / P9851 / P0091
	>spacer37
	TTATGATTGAATGACATGGTTGTATAAGTA	Streptococcus phages: P9854 / P9852 / P9851 / TP-778L / 858; Streptococcus thermophilus bacteriophage 2972
	>spacer38
	TTTCTTTAGGAATACCAGGGAGTTCAGCTT	Enterococcus faecium HB6 plasmid pAR6 / Enterococcus faecium JH95 plasmid pJS33 / Enterococcus faecium plasmid pEFR
	>spacer39
	TGGCAGAGATTACACAGCAACGGAAACAGC	Streptococcus pneumoniae Hu15 plasmid pSpn / Streptococcus pneumoniae Hu17 plasmid pSpn / Streptococcus pneumoniae pSpnP1 plasmid
	>spacer40
	GGGTATCATTGTATCTAGTGATGGACCTGA
	>spacer41
	ATTTGAAAAATGCACAACAGCGTTTGATAG	Streptococcus phage TP-J34
LMD-9 (649125..650217)	>spacer1
	ATGATGATGAAGTATCGTCATCTACTAAC
	>spacer2
	CTTCACCTCAAATCTTAGAGCTGGACTAAA	Streptococcus phages: P7602 / P3684; Streptococcus thermophilus bacteriophage 7201
	>spacer3
	ATGTCTGAAAAATAACCGACCATCATTACT	Streptococcus phages: 9A / P8921 / P3684 / P3681 / TP-778L
	>spacer4
	GAAGCTCATCATGTTAAGGCTAAAACCTAT	Streptococcus phage vB_SthS_VA460 / vB_SthS_VA698 / P7133 / P3684 / P3681 / 128
	>spacer5
	TAGTCTAAATAGATTTCTTGCACCATTGTA	Streptococcus phage vB_SthS_VA460
	>spacer6
	ATTCGTGAAAAAATATCGTGAAATAGGCAA	Streptococcus suis strain 6936 plasmid unnamed1 / Streptococcus suis strain ST104 zonular occludens toxin (zot) gene
	>spacer7
	TCTAGGCTCATCTAAAGATAAATCAGTAGC	Streptococcus phages: vB_SthS_VA460 / vB_SthS_VA214 / P9853 / P7955 / P7573 / P7572 / P7571 / P4761 / D4276 / CHPC926 / CHPC577 / 9874 / 9873 / 9872 / ALQ13.2 / 858; Streptococcus thermophilus bacteriophages: J1 / ST3 / Sfi16A / S3b
	>spacer8
	TAAAAACATGGGGCGGCGGTAATAGTGTAAG
	>spacer9
	ACAACCAGCAAAGAGAGCGCCGACAACATT
	>spacer10
	TATAACACAGGTTTAGAGGATGTTATACTT
	>spacer11
	CTAGAAGCTCAAGCGGTAAAAGTTGATGGCG
	>spacer12
	CTTTGAGGGCAAGCCCTCGCCGTTCCATTT
	>spacer13
	AACTACCAAGCAAATCAGCAATCAATAAGT	Streptococcus phages: 16B8 / 7T / P7633 / P7632 / P7602 / P7573 / P0091; Streptococcus thermophilus bacteriophage Sfi19
	>spacer14
	CTATAAGTGACAATCAGCGTAGGGAATACG
	>spacer15
	ATCAGTGCGGTATATTTACCCTAGACGCTA
	>spacer16
	AACAGTTACTATTAATCACGATTCCAACGG	Streptococcus phage vB_SthS_VA460
SMQ-301 (649756..650847)	>spacer1
	CGTGGCAGCGTGGTCGGGTTTAATAGCCCG	Streptococcus phages: vB_SthS_VA214 / P9903 / P9902 / P8921 / P7632 / P7631 / P7574 / P7152 / P5651 / P0091 / 128
	>spacer2
	AAGCCCAAGTCAGAGCATCCGTCCAAGCC	Streptococcus suis strain 6936 plasmid unnamed1
	>spacer3
	ATTGGGTTTCGGTAAGAACTAAACATACCA	Streptococcus phage YMC-2011
	>spacer4
	CACAAAATAATTCGGTAGTTTTTACTAACT	Streptococcus phages: P9854 / P9851
	>spacer5
	TTTGACCGTTTATTTAGACGTGCTAAAGT
	>spacer6
	AATATCTACAGGTCACTACAAAGCTACGCT	Streptococcus phages: vB_SthS_VA460 / vB_SthS_VA698 / P9854 / P9851 / P7573 / P5641 / P3684 / P3681; Streptococcus thermophilus bacteriophages: 7201 / Sfi21 / Sfi19
	>spacer7
	TCTAGGCTCATCTAAAGATAAATCAGTAGC	Streptococcus phages: vB_SthS_VA460 / vB_SthS_VA214 / P9853 / P7955 / P7573 / P7572 / P7571 / P4761 / D4276 / CHPC926 / CHPC577 / 9874 / 9873 / 9872 / ALQ13.2 / 858; Streptococcus thermophilus bacteriophages: J1 / ST3 / Sfi16A / S3b
	>spacer8
	TAAAAACATGGGGCGGCGGTAATAGTGTAAG
	>spacer9
	ACAACCAGCAAAGAGAGCGCCGACAACATT
	>spacer10
	TATAACACAGGTTTAGAGGATGTTATACTT
	>spacer11
	CTAGAAGCTCAAGCGGTAAAAGTTGATGGCG
	>spacer12
	CTTTGAGGGCAAGCCCTCGCCGTTCCATTT
	>spacer13
	AACTACCAAGCAAATCAGCAATCAATAAGT	Streptococcus phages: 16B8 / 7T / P7633 / P7632 / P7602 / P7573 / P0091; Streptococcus thermophilus bacteriophage Sfi19
	>spacer14
	CTATAAGTGACAATCAGCGTAGGGAATACG
	>spacer15
	ATCAGTGCGGTATATTTACCCTAGACGCTA
	>spacer16
	AACAGTTACTATTAATCACGATTCCAACGG	Streptococcus phage vB_SthS_VA460
GABA (652778..655449)	>spacer1
	GACTCTATTGGCGTTTTACCACTTATTGCT
	>spacer2
	ATTCTAGATAGTAACGGAAACAAAGTACAG
	>spacer3
	GTATCCAGTTATCGTCATTCTCTTTACCTG	Streptococcus phages: P4761 / TP-778L
	>spacer4
	CCAAATTTGCATTAAACAAAACGCTCCTTC	Streptococcus phages: vB_SthS_VA214 / P9901 / P9854 / P9851 / P7574 / P7573 / P0091
	>spacer5
	CTCGTAACTAAGTTTGAAAACTTCTTTGAC	Streptococcus phages: STP2 / STP1 / P7955 / P7951 / P7602 / P7573 / P7132 / P5641 / P0092 / D4276 / CHPC926 / 9874
	>spacer6
	ACAGTAAGATACACGTAGTTGATGAATTG	Streptococcus phages: P7955 / P7951 / P7572 / P7571 / TP-778L; Streptococcus thermophilus bacteriophage O1205
	>spacer7
	AAGACATATCTTTTTAACATCATGAAGACG	Streptococcus phages: P9853 / P9852 / P7951 / P7572 / P7571 / 858; Streptococcus thermophilus bacteriophage 2972
	>spacer8
	TAAAACTTACTGCAGACAGTGTTAATTATC
	>spacer9
	CACAAAATAATTCGGTAGTTTTTACTAACT	Streptococcus phages: P9854 / P9851
	>spacer10
	TTTGACCGTTTATTTAGACGTGCTAAAGT
	>spacer11
	AATATCTACAGGTCACTACAAAGCTACGCT	Streptococcus phages: vB_SthS_VA460 / vB_SthS_VA698 / P9854 / P9851 / P7573 / P5641 / P3684 / P3681; Streptococcus thermophilus bacteriophages: 7201 / Sfi21 / Sfi19
	>spacer12
	TGATAGAGAATGGTCGTTAAATGGTGTAAT	Streptococcus phages: P7632 / P7631 / P7573 / P7134 / P3684 / P3681 / P7602
	>spacer13
	TCAGTTTCAAATGCTCCACCACCGATATTA	Streptococcus phages: P3684 / P3681
	>spacer14
	GTTCGGGTTCAGGTGGTTTTATACTCAACT	Streptococcus phage D4276
	>spacer15
	AACATGCATCAGTTTGGATACGAGGTCAAG	Streptococcus phage P0091
	>spacer16
	GAACAAGTAGAAGGAGGAGTGGAAGAGTCG
	>spacer17
	ACGAGTGGGCTATCAGTCACGGACTGGATA	Streptococcus phages: MM25 / P9852 / P9851 / P8922 / P8921 / P7955 / P7951 / P7633 / P7632 / P7631 / P7573 / P7572 / P7571 / P7154 / P7152 / P7151 / P7134 / P7133 / P7132 / P5652 / P5651 / D4276 / 128 / Abc2 / ALQ13.2; Streptococcus thermophilus bacteriophages: Sfi11 / DT1 / SFi18 / Sfi21 / Sfi19
	>spacer18
	CTTGACTAATACGTCTGGATTTACTGCACT	Streptococcus phages: V2 / R1 / M19 / C0 / 16B8 / 9B4 / 7T / P9901 / P9854 / P7574 / P7573 / P3684 / P3681; Streptococcus thermophilus bacteriophage 7201
	>spacer19
	AAATAGACTGGAATGGATTGAGAATAATCT	Streptococcus phages: P0095 / 5093
	>spacer20
	TTGAAAAAGATAGACAATATCAAACTCTGG
	>spacer21
	TCAGAAAGCGGTTGCTGTGCCTGTGCTGG
	>spacer22
	AGACCATCCGTTCTTTGTGTTTAGAGCCAT
	>spacer23
	GATACCGTTTTTACAATAATATCTATACCA	Streptococcus phage vB_SthS_VA214
	>spacer24
	GGCCGCATCGGAAAATGGGCTTGTTATCGG
	>spacer25
	CTGCTCGATAAATACTTAGCTACTGGTTTT
	>spacer26
	TGTTGATAGCGTCACCCACTGAGTTATCTTG
	>spacer27
	GGAAACGCTAGCTTAGCTAAATTTCAAGCA	Streptococcus phages: vB_SthS_VA214 / 5093
	>spacer28
	CTTGAATCTGCTTGACTGATAATGTGCTAT	Streptococcus phages: vB_SthS_VA460 / P8921 / P3684 / P3681; Streptococcus thermophilus bacteriophage 7201
	>spacer29
	GGAAACGCTAGCTTAGCTAAATTTCAAGCA	Streptococcus phages: vB_SthS_VA214 / 5093
	>spacer30
	CTTGAATCTGCTTGACTGATAATGTGCTAT	Streptococcus phages: vB_SthS_VA460 / P8921 / P3684 / P3681; Streptococcus thermophilus bacteriophage 7201
	>spacer31
	TCATAGCTACTTTGAGAGTGAAGAAGCACA	Streptococcus phages: P7955 / P7951 / CHPC926 / 9873 / 9872 / 9871
	>spacer32
	AAACCGACTTGAGTGGATTGAAAATAATCT	Streptococcus phage 9874; Streptococcus thermophilus bacteriophage DT1
	>spacer33
	ATTGATAGAACCGGTGAAATTTTTCCTATC	Streptococcus phage vB_SthS_VA214
	>spacer34
	TAGATGACATAAAAATTTCACACAGTGAAG	Streptococcus phages: P7955 / P7573; Streptococcus thermophilus bacteriophage 7201
	>spacer35
	CGAACATTGCAGAACTGGGGAAATGGGTAC
	>spacer36
	TAAGAAACCTGTCGGAGAAGCTAAAAGCTG	Streptococcus phage MM25 / P9901 / P8921 / P7601 / P7152 / P7132 / D4276 / 53
	>spacer37
	CTCACTAGTCCATTAGTGCGGTTAGGGAA	Streptococcus phage 9A / P8922 / P8921 / P7953 / P7633 / P7632 / P7631 / P7572 / P7571 / P7154 / P7151 / P7132 / P5652 / P5651 / 53; Streptococcus thermophilus bacteriophage DT1
	>spacer38
	TGGTACTACACCTCAAACGGTGAGTGCATG	Streptococcus phage MM25 / 9A / vB_SthS_VA698 / P8922 / P8921 / P7954 / P7953 / P7952 / P7633 / P7632 / P7631 / P7154 / P7152 / P7151 / P7134 / P7133 / P5652 / P5651 / D4276; Streptococcus thermophilus bacteriophages: DT1 / 7201
	>spacer39
	GCAACAATGGTTATAATTATCCCACACAGG
	>spacer40
	GCATACGCTGTTACAAACACACCCCACCC
ST3 (652775..653929)	>spacer1
	GACGTTCAATGAAATATTCTTATCAGACAT	Streptococcus pyogenes A996 plasmid pA996
	>spacer2
	TCTGACGATAAAGAGAATATCTCAAAGGGT
	>spacer3
	GGGTGCGATGGATTCAATGACAAAGAGCAC	Streptococcus phages: M19 / 9A / P8922 / P8921 / P7633 / P7632 / P7631 / P7154 / P7152 / P7151 / P5651 / 128 /
	>spacer4
	TAAAACTTACTGCAGACAGTGTTAATTATC
	>spacer5
	CACAAAATAATTCGGTAGTTTTTACTAACT	Streptococcus phages: P9854 / P9851
	>spacer6
	TTTGACCGTTTATTTAGACGTGCTAAAGT
	>spacer7
	AATATCTACAGGTCACTACAAAGCTACGCT	Streptococcus phages: vB_SthS_VA460 / vB_SthS_VA698 / P9854 / P9851 / P7573 / P5641 / P3684 / P3681; Streptococcus thermophilus bacteriophages: 7201 / Sfi21 / Sfi19
	>spacer8
	TGATAGAGAATGGTCGTTAAATGGTGTAAT	Streptococcus phages: P7632 / P7631 / P7573 / P7134 / P3684 / P3681 / P7602
	>spacer9
	TCAGTTTCAAATGCTCCACCACCGATATTA	Streptococcus phages: P3684 / P3681
	>spacer10
	GTTCGGGTTCAGGTGGTTTTATACTCAACT	Streptococcus phage D4276
	>spacer11
	AACATGCATCAGTTTGGATACGAGGTCAAG	Streptococcus phage P0091
	>spacer12
	CGAACATTGCAGAACTGGGGAAATGGGTAC
	>spacer13
	TAAGAAACCTGTCGGAGAAGCTAAAAGCTG	Streptococcus phage MM25 / P9901 / P8921 / P7601 / P7152 / P7132 / D4276 / 53
	>spacer14
	CTCACTAGTCCATTAGTGCGGTTAGGGAA	Streptococcus phage 9A / P8922 / P8921 / P7953 / P7633 / P7632 / P7631 / P7572 / P7571 / P7154 / P7151 / P7132 / P5652 / P5651 / 53; Streptococcus thermophilus bacteriophage DT1
	>spacer15
	TGGTACTACACCTCAAACGGTGAGTGCATG	Streptococcus phage MM25 / 9A / vB_SthS_VA698 / P8922 / P8921 / P7954 / P7953 / P7952 / P7633 / P7632 / P7631 / P7154 / P7152 / P7151 / P7134 / P7133 / P5652 / P5651 / D4276; Streptococcus thermophilus bacteriophages: DT1 / 7201
	>spacer16
	GCAACAATGGTTATAATTATCCCACACAGG
	>spacer17
	GCATACGCTGTTACAAACACACCCCACCC
ND03 (639512..641921)	>spacer1
	TCTTTCTATAGCATAATTGTTAGTTGTCCT	Streptococcus phages: P7951 / D4276
	>spacer2
	GAAAGAATCGGTCTTCTAGATGGATTCCAA	Streptococcus phages: vB_SthS_VA214 / STP2 / STP1 / L5A1 / C0 / B5 / B0 / 7A5 / A0 / P0094 / P0093 / P0091 / CHPC1151 / CHPC926 / 9871 / Abc2
	>spacer3
	TAGGAAATTCATACCCTGCAGATATATCAT
	>spacer4
	AACGATAAAAAAGAAGAAGCTTTCACGCCT
	>spacer5
	TCGATTTTAAGCCGTGTATTTTGCTAGGTA	Streptococcus thermophilus bacteriophage 7201
	>spacer6
	GCTTGGAGGCGTCAATGTTCGCAGCTTATC
	>spacer7
	ACCTGTCATCTCTGGGAGTTAAATTTCCTT	Streptococcus thermophilus bacteriophage 7201
	>spacer8
	ATTAGCACGAGCCTCTGTATACTGTTCTTT	Streptococcus phages: R1 / MM25 / L5A1 / 31B4 / 7A5 / P9903 / P9902 / P8921 / P7602 / P7601 / P7574 / P7154 / P7152 / P7151 / P7134 / P7133 / P7132 / P5652 / P5651 / P5641 / D4276 / 53 / 73 / Abc2 / vB_SthS_VA460; Streptococcus thermophilus bacteriophage DT1
	>spacer9
	TTTGGTCTGGTGCGCCTTTTATATTGAATT
	>spacer10
	GGTTCCCTATGAGCAAAGGACAACGCTTT
	>spacer11
	TCGATTTTAAGCCGTGTATTTTGCTAGGTA	Streptococcus thermophilus bacteriophage 7201
	>spacer12
	GCTTGGAGGCGTCAATGTTCGCAGCTTATC
	>spacer13
	ACATTGAGTAAGTCAATAGTTTGCGATGGC	Streptococcus phage 9871
	>spacer14
	TAGAATAAGTGAATGGGAAACTGACGGAAC
	>spacer15
	ACATAGAAGGCTAAGCAATCAAGCAAAAGA
	>spacer16
	ACGACATCAAGCTGATTATCTTCTACATAC	Streptococcus phages: V2 / R1 / MM25 / 31B4 / 16B8 / 9B4 / 7A5 / 7T / P7133 / P5652 / P0091 / Abc2 / vB_SthS_VA460 / vB_SthS_VA214
	>spacer17
	CTGTCTAACATAGTCCCAAACTTTATCATA
	>spacer18
	CTAAAAACGGTGTTCTATATCGAGGTCAAC
	>spacer19
	TGTTTCCATCCGTGGTGAAATGGTAGAAGT	Streptococcus phages: TP-778L / 858
	>spacer20
	TTGAGCATTTACTTACTAATTTCAAACGGT
	>spacer21
	AGATGACCTATAATATAATCAAAATCACCT
	>spacer22
	TCTATCTTAGGCGGTGGACTGATGACGTTA
	>spacer23
	GATAGATATATATATTATATCACAATCCTA	Streptococcus phage P0091
	>spacer24
	TTATAGTATATCTAATGTGTTCCCGTTTGT	Streptococcus phages: L5A1 / C0 / B5 / B0 / 7A5 / A0 / P7574 / P7572 / P7571 / P7132 / 53 / ALQ13.2
	>spacer25
	TTGAAATTTATAATATGGATGTCGATGATG	Streptococcus phage P7573; Streptococcus thermophilus bacteriophage O1205
	>spacer26
	TCTAGAGACCTCTTCGTGTTGTCACAACCT	Streptococcus phage vB_SthS_VA214 / vB_SthS_VA698 / V2 / R1 / M19 / L5A1 / C0 / 16B8 / 9B4 / 9A / A0 / 7T / P9903 / P9902 / P9901 / P8922 / P8921 / P7632 / P7631 / P7154 / P7152 / P7151 / P7134 / P7133 / P5652 / P5651 / P5641 / P3684 / P0091 / 128; Streptococcus thermophilus bacteriophage 7201
	>spacer27
	GCTCTTTCCTACTCCTGTGTCTCCTATTA	Streptococcus phage P0092
	>spacer28
	GTTTATCACTTATTTGATATACACTTATAA
	>spacer29
	ATATCGGTGGTGGTGCGTTTGAAACTGACA	Streptococcus phage vB_SthS_VA698 / V2 / R1 / M19 / C0 / 16B8 / 9B4 / 7T / P9901 / P7574; Streptococcus thermophilus bacteriophage 7201
	>spacer30
	GACCCACGGATACCGCCAAAACAGCACGTG	Streptococcus phages: P7574 / P7573
	>spacer31
	GAAGTGATAGACGTTGTTAACTCATCAGCA
	>spacer32
	TTTCTGTGTACTCCATCGGCTTTTGAGTGT	Streptococcus phage CHPC926 / CHPC577 / 9874 / 9873 / 9872 / 9871; Lactococcus phage P335
	>spacer33
	GCTTTGCGAGTAACGCCGGTTGCTTTTCCT
	>spacer34
	TTGGCATCAGTGAATTTGATGCCTGGAAGT	Streptococcus phage P5641
	>spacer35
	AATTTTGCCCCTTCTTTGCCCCTTGACTAG	Streptococcus phage 5093
	>spacer36
	ACCATTAGCAATCATTTGTGCCCATTGAGT	Streptococcus thermophilus bacteriophages: Sfi21 / Sfi19
APC151 (1689194.. 1691603)	>spacer1
	TCTTTCTATAGCATAATTGTTAGTTGTCCT	Streptococcus phages: P7951 / D4276
	>spacer2
	GAAAGAATCGGTCTTCTAGATGGATTCCAA	Streptococcus phages: vB_SthS_VA214 / STP2 / STP1 / L5A1 / C0 / B5 / B0 / 7A5 / A0 / P0094 / P0093 / P0091 / CHPC1151 / CHPC926 / 9871 / Abc2
	>spacer3
	TAGGAAATTCATACCCTGCAGATATATCAT
	>spacer4
	AACGATAAAAAAGAAGAAGCTTTCACGCCT
	>spacer5
	TCGATTTTAAGCCGTGTATTTTGCTAGGTA	Streptococcus thermophilus bacteriophage 7201
	>spacer6
	GCTTGGAGGCGTCAATGTTCGCAGCTTATC
	>spacer7
	ACCTGTCATCTCTGGGAGTTAAATTTCCTT	Streptococcus thermophilus bacteriophage 7201
	>spacer8
	ATTAGCACGAGCCTCTGTATACTGTTCTTT	Streptococcus phages: R1 / MM25 / L5A1 / 31B4 / 7A5 / P9903 / P9902 / P8921 / P7602 / P7601 / P7574 / P7154 / P7152 / P7151 / P7134 / P7133 / P7132 / P5652 / P5651 / P5641 / D4276 / 53 / 73 / Abc2 / vB_SthS_VA460; Streptococcus thermophilus bacteriophage DT1
	>spacer9
	TTTGGTCTGGTGCGCCTTTTATATTGAATT
	>spacer10
	GGTTCCCTATGAGCAAAGGACAACGCTTT
	>spacer11
	TCGATTTTAAGCCGTGTATTTTGCTAGGTA	Streptococcus thermophilus bacteriophage 7201
	>spacer12
	GCTTGGAGGCGTCAATGTTCGCAGCTTATC
	>spacer13
	ACATTGAGTAAGTCAATAGTTTGCGATGGC	Streptococcus phage 9871
	>spacer14
	TAGAATAAGTGAATGGGAAACTGACGGAAC
	>spacer15
	ACATAGAAGGCTAAGCAATCAAGCAAAAGA
	>spacer16
	ACGACATCAAGCTGATTATCTTCTACATAC	Streptococcus phages: V2 / R1 / MM25 / 31B4 / 16B8 / 9B4 / 7A5 / 7T / P7133 / P5652 / P0091 / Abc2 / vB_SthS_VA460 / vB_SthS_VA214
	>spacer17
	CTGTCTAACATAGTCCCAAACTTTATCATA
	>spacer18
	CTAAAAACGGTGTTCTATATCGAGGTCAAC
	>spacer19
	TGTTTCCATCCGTGGTGAAATGGTAGAAGT	Streptococcus phages: TP-778L / 858
	>spacer20
	TTGAGCATTTACTTACTAATTTCAAACGGT
	>spacer21
	AGATGACCTATAATATAATCAAAATCACCT
	>spacer22
	TCTATCTTAGGCGGTGGACTGATGACGTTA
	>spacer23
	GATAGATATATATATTATATCACAATCCTA	Streptococcus phage P0091
	>spacer24
	TTATAGTATATCTAATGTGTTCCCGTTTGT	Streptococcus phages: L5A1 / C0 / B5 / B0 / 7A5 / A0 / P7574 / P7572 / P7571 / P7132 / 53 / ALQ13.2
	>spacer25
	TTGAAATTTATAATATGGATGTCGATGATG	Streptococcus phage P7573; Streptococcus thermophilus bacteriophage O1205
	>spacer26
	TCTAGAGACCTCTTCGTGTTGTCACAACCT	Streptococcus phage vB_SthS_VA214 / vB_SthS_VA698 / V2 / R1 / M19 / L5A1 / C0 / 16B8 / 9B4 / 9A / A0 / 7T / P9903 / P9902 / P9901 / P8922 / P8921 / P7632 / P7631 / P7154 / P7152 / P7151 / P7134 / P7133 / P5652 / P5651 / P5641 / P3684 / P0091 / 128; Streptococcus thermophilus bacteriophage 7201
	>spacer27
	GCTCTTTCCTACTCCTGTGTCTCCTATTA	Streptococcus phage P0092
	>spacer28
	GTTTATCACTTATTTGATATACACTTATAA
	>spacer29
	ATATCGGTGGTGGTGCGTTTGAAACTGACA	Streptococcus phage vB_SthS_VA698 / V2 / R1 / M19 / C0 / 16B8 / 9B4 / 7T / P9901 / P7574; Streptococcus thermophilus bacteriophage 7201
	>spacer30
	GACCCACGGATACCGCCAAAACAGCACGTG	Streptococcus phages: P7574 / P7573
	>spacer31
	GAAGTGATAGACGTTGTTAACTCATCAGCA
	>spacer32
	TTTCTGTGTACTCCATCGGCTTTTGAGTGT	Streptococcus phage CHPC926 / CHPC577 / 9874 / 9873 / 9872 / 9871; Lactococcus phage P335
	>spacer33
	GCTTTGCGAGTAACGCCGGTTGCTTTTCCT
	>spacer34
	TTGGCATCAGTGAATTTGATGCCTGGAAGT	Streptococcus phage P5641
	>spacer35
	AATTTTGCCCCTTCTTTGCCCCTTGACTAG	Streptococcus phage 5093
	>spacer36
	ACCATTAGCAATCATTTGTGCCCATTGAGT	Streptococcus thermophilus bacteriophages: Sfi21 / Sfi19
JIM 8232 (712332..715137)	>spacer1
	ATGAGGTCGAGAAGGAAAAACGATATGCAG	Streptococcus phage M19
	>spacer2
	ATCCTCAATAGCATTGACAAAGTCTTTTCT	Streptococcus thermophilus bacteriophage 7201
	>spacer3
	TCAATCTTCCTGTCTTTGAAATATTTCTTT	Streptococcus phage 5093
	>spacer4
	TTGGAATTTAACGTTTGAAGAACGGAAGAA	Streptococcus phage vB_SthS_VA460
	>spacer5
	GTGGTCTTTCGTGGGTGCTGCGCTCTGGTT
	>spacer6
	ACTAAAATCATTTTCAACGAGTTGAGAGAC	Streptococcus phages: P7602 / P7574; Streptococcus thermophilus bacteriophage 7201 (3rd hit)
	>spacer7
	TATATTCGCGAGGGTGATATAGTCGTGGTG	Lactobacillus salivarius CECT 5713 plasmid pHN1
	>spacer8
	CATATATGATAGTTTGTCAACACCTTTTAT	Streptococcus phages: P7602 / P5641 / CHPC577
	>spacer9
	TAAATGGGTTATGCTGTTCAATATGCGTCC	Streptococcus phage P7573
	>spacer10
	AAACTTGCCAGCAATCGGAATGTAAAGGCC	Streptococcus thermophilus bacteriophage DT2
	>spacer11
	TTAGACCCTAAAGAGGTAGAGCGCCATATA
	>spacer12
	AAAAGGTTGGCTAGTGTAATAAGTTCGTCA	Streptococcus phages: M19 / L5A1 / C0 / B5 / B0 / 7A5 / A0 / P7955 / P7573 / P7132 / 53 / ALQ13.2
	>spacer13
	TACCATTGTTTCTCTCCACCGTGGAAGGTT	Streptococcus phages: P0094 / P0093 / P0091 / CHPC1151
	>spacer14
	GGCATTAGACAGATACATTGATAGCCAACT
	>spacer15
	AAGAAGCAGCAAGATGCATCAAACACCGCA	Streptococcus phage V2 / STP2 / R1 / M19 / L5A1 / C0 / B5 / B0 / 31B4 / 9B4 / A0 / 7T / vB_SthS_VA698 / P9902 / P9901 / P7951 / P7573 / P7151 / P7134 / P3684 / P3681 / 53 / Abc2 / ALQ13.2
	>spacer16
	TGAAAATCTCACTAGTCCATTAGTGCGGTT
	>spacer17
	ATCACCCAACTTTCTTGTGCTTTCTAAGTG	Streptococcus phages: V2 / STP2 / STP1 / R1 / L5A1 / C0 / B5 / B0 / 31B4 / 16B8 / 9B4 / 9A / 7A5 / A0 / 7T / vB_SthS_VA698 / P9903 / P9902 / P8922 / P8921 / P7633 / P7632 / P7631 / P7601 / P7574 / P7154 / P7152 / P7151 / P7134 / P7133 / P7132 / P5652 / P5651 / D4276 / 128 / 53 / 73 / Abc2; Streptococcus thermophilus bacteriophage DT1
	>spacer18
	GCTTAGCTGTCCAATCCACAAACGTGGATG	Streptococcus phages: V2 / R1 / M19 / C0 / 31B4 / 16B8 / 9B4 / 9A / 7A5 / A0 / 7T / vB_SthS_VA698 / P9902 / P8922 / P8921 / P7633 / P7632 / P7631 / P7601 / P7154 / P7152 / P7151 / P7132 / P5652 / P5651 / P5641 / P3684 / P3681 / 128 / 53 / 73
	>spacer19
	GCTAACTTAAGCAAGCAGTACGAAAAGCAG	Streptococcus thermophilus bacteriophage 7201
	>spacer20
	AAAAAAGATGGTATCAATTATCTAGAATTG
	>spacer21
	CTCTTAAGGTCATTTCAGTGTCTTGGTTA	Streptococcus phage M19; Streptococcus thermophilus bacteriophage 7201
	>spacer22
	ATTGTCTATTACGACAACATGGAAGATAGT	Streptococcus phages: STP2 / STP1 / L5A1 / C0 / B5 / B0 / 7A5 / A0 / P9853 / P5641 / 858; Streptococcus thermophilus bacteriophage 2972
	>spacer23
	TACACTAGTAGTTGTGTCCCAAATTTTAGA	Streptococcus thermophilus bacteriophage 7201
	>spacer24
	ACTAAAATCATTTTCAACGAGTTGAGAGAC	Streptococcus phages: P7602 / P7574; Streptococcus thermophilus bacteriophage 7201 (3rd hit)
	>spacer25
	TATATTCGCGAGGGTGATATAGTCGTGGTG	Lactobacillus salivarius CECT 5713 plasmid pHN1
	>spacer26
	TAGGGATATGAAGCCCAAATTGTTGCAATG	Streptococcus phage D4276
	>spacer27
	TTTCCCGGTGTATAGATTGGCTCTATAGTCT	Streptococcus phages: P9903 / P9902 / P9901 / 73 / Abc2
	>spacer28
	TATATATAAGTTTCCGAAAGTAGACGAACC	Streptococcus phages: M19 / Abc2
	>spacer29
	CATTATTAAACCCATGCTTTTTACCACACT	Streptococcus thermophilus bacteriophage 7201
	>spacer30
	CATTATTAAACCCATGCTTTTTACCACACT	Streptococcus thermophilus bacteriophage 7201
	>spacer31
	AGCCGATAGTTAAATCAACTGATTGTGGAT
	>spacer32
	CGTGCTACAAATCTCTTTACGACAATTTAG	Streptococcus thermophilus bacteriophage 7201
	>spacer33
	TTTTTTTGATACATTTAAGGGCGCTTTCAT	Streptococcus phage CHPC1151
	>spacer34
	ACGAGAGTCTTTCAGTCTATCCATTGCCTG	Streptococcus phages: P0095 / P0094 / P0093 / P0092 / CHPC1151 / 5093
	>spacer35
	CATTTTCCGTTTTTTTTGTCTCTACCCCAT
	>spacer36
	AGCTGTGATAACACGAAGAGAACTCTAGA	Streptococcus phages: V2 / R1 / M19 / L5A1 / C0 / 16B8 / 9B4 / 9A / A0 / 7T / vB_SthS_VA214 / vB_SthS_VA698 / P9903 / P9902 / P9901 / P8922 / P8921 / P7632 / P7631 / P7154 / P7152 / P7151 / P7134 / P7133 / P5652 / P5651 / P5641 / P3684 / P0091 / 128; Streptococcus thermophilus bacteriophage 7201
	>spacer37
	AAACATTGATGAGTATTATTGAAAAACTTCA	Streptococcus phages: V2 / STP2 / R1 / M19 / L5A1 / C0 / B5 / B0 / 31B4 / 9B4 / A0 / 7T / vB_SthS_VA698 / P9902 / P7573 / P7151 / P7134 / P3684 / P3681 / 53 / Abc2 / ALQ13.2
	>spacer38
	GGGTCAAGGTATAAGATAGAGTTTTCTATA
	>spacer39
	TAGGTACTTTAACCTGACCAGATACAATC
	>spacer40
	CCTCAAAGCTTAAAATTGGGCTGAAGTAGA	Streptococcus phages: M19 / P5641
	>spacer41
	AGGTTGTAACAAAAAAGATGCTAACAAGA
	>spacer42
	TAATGCTACATCTCAAAGGATGATCCCAGA	Streptococcus thermophilus bacteriophages: Sfi21 / Sfi19
MN-ZLW-002 (630165..632177)	>spacer1
	GATAGCAATAGCTTTCTTGACCTAAAAGAC	Streptococcus thermophilus bacteriophage Sfi21
	>spacer2
	GAGGTCTGTAATTTCATTCCCTCGTAATCT	Streptococcus suis 6936 plasmid unnamed1
	>spacer3
	AAAGGTTTCTCTAAACACATGCGGAATAT
	>spacer4
	GTCATAGTACCAAGCACAAATAACGTTAGT
	>spacer5
	GTGTATTTAGTAATGGTGATTTTTTAAATT
	>spacer6
	CATTCATTTTTTATATATCAATAAAACTTT
	>spacer7
	GGGGATTCTTATTTCACTGTAGTTACGATG
	>spacer8
	CAAAAATTGATGTCACAATTAATAAAGGTG
	>spacer9
	CTATTTCTGACAATGGTTGAAATTGTGTTC
	>spacer10
	CTTTTTTTAAATTAATTTATCGTAAGCAA	Streptococcus phages: V2 / R1 / M19 / C0 / 31B4 / 16B8 / 9B4 / 7A5 / A0 / 7T / vB_SthS_VA214 / P9901 / P7601 / P7132 / P5641 / P3684 / P3681 / P0091 / 128 / 53 / 73
	>spacer11
	AACAAACTTATGAGAACGGTTGAACGGCTT	Streptococcus thermophilus bacteriophage Sfi21
	>spacer12
	AGCCCGCTTATTGCTTCAGTTGGTTTATAT
	>spacer13
	TGGAGCAACAAGAATGATTAACTCTAATGC	Streptococcus phages: P9903 / P9902 / 73
	>spacer14
	TTTGATGGATATCATTGATAAACTATACGA	Streptococcus phages: STP1 / 16B8 / 7A5 / P7955 / P7954; Streptococcus thermophilus bacteriophage DT1
	>spacer15
	TAACGAAAGCAATACCAATCGTGCTAAAGC
	>spacer16
	TATTCCTATGGTCGATATTCGAACAGTCAA
	>spacer17
	CAGGGGACAAGGACTTTGACCCAACAGAAG
	>spacer18
	AGAAACACCTAATGGTCTCTTAGAACCCGA
	>spacer19
	AAGAAGTTAAAGACAACTTTGTTAAAGACT	Streptococcus phage vB_SthS_VA214
	>spacer20
	GAAAAAGCATCCATGATAGTGCTTAGACCT	Streptococcus thermophilus bacteriophage 7201
	>spacer21
	CGGAATGGTATAAAGAATACAAAGAAAACG
	>spacer22
	CCAAGTATCACGCAAAGAAATCAACGAGA
	>spacer23
	TTGACCTGTTTATCCTTGTTAACTAGAATAG
	>spacer24
	AGAGCACTAGCATACTGTTTAGTCCGAACG
	>spacer25
	AGGCAAGGTATTTGATCCAACAGAAGCCAA
	>spacer26
	CATGATTTACAACCACGCGCTAGACCAAG
	>spacer27
	ACCTAGAAGCATTTGAGCGTATATTGATTG
	>spacer28
	AATTTTGCCCCTTCTTTGCCCCTTGACTAG	Streptococcus phage 5093
	>spacer29
	TAATAGTTTACCAAATCGTCCTTGTTCCAA	Streptococcus phage P0095
	>spacer30
	ACCATTAGCAATCATTTGTGCCCATTGAGT	Streptococcus thermophilus bacteriophages: Sfi21 / Sfi19
MN-BM-A01 (443838..445850)	>spacer1
	GATAGCAATAGCTTTCTTGACCTAAAAGAC	Streptococcus thermophilus bacteriophage Sfi21
	>spacer2
	GAGGTCTGTAATTTCATTCCCTCGTAATCT	Streptococcus suis 6936 plasmid unnamed1
	>spacer3
	AAAGGTTTCTCTAAACACATGCGGAATAT
	>spacer4
	GTCATAGTACCAAGCACAAATAACGTTAGT
	>spacer5
	GTGTATTTAGTAATGGTGATTTTTTAAATT
	>spacer6
	CATTCATTTTTTATATATCAATAAAACTTT
	>spacer7
	GGGGATTCTTATTTCACTGTAGTTACGATG
	>spacer8
	CAAAAATTGATGTCACAATTAATAAAGGTG
	>spacer9
	CTATTTCTGACAATGGTTGAAATTGTGTTC
	>spacer10
	CTTTTTTTAAATTAATTTATCGTAAGCAA	Streptococcus phages: V2 / R1 / M19 / C0 / 31B4 / 16B8 / 9B4 / 7A5 / A0 / 7T / vB_SthS_VA214 / P9901 / P7601 / P7132 / P5641 / P3684 / P3681 / P0091 / 128 / 53 / 73
	>spacer11
	AACAAACTTATGAGAACGGTTGAACGGCTT	Streptococcus thermophilus bacteriophage Sfi21
	>spacer12
	AGCCCGCTTATTGCTTCAGTTGGTTTATAT
	>spacer13
	TGGAGCAACAAGAATGATTAACTCTAATGC	Streptococcus phages: P9903 / P9902 / 73
	>spacer14
	TTTGATGGATATCATTGATAAACTATACGA	Streptococcus phages: STP1 / 16B8 / 7A5 / P7955 / P7954; Streptococcus thermophilus bacteriophage DT1
	>spacer15
	TAACGAAAGCAATACCAATCGTGCTAAAGC
	>spacer16
	TATTCCTATGGTCGATATTCGAACAGTCAA
	>spacer17
	CAGGGGACAAGGACTTTGACCCAACAGAAG
	>spacer18
	AGAAACACCTAATGGTCTCTTAGAACCCGA
	>spacer19
	AAGAAGTTAAAGACAACTTTGTTAAAGACT	Streptococcus phage vB_SthS_VA214
	>spacer20
	GAAAAAGCATCCATGATAGTGCTTAGACCT	Streptococcus thermophilus bacteriophage 7201
	>spacer21
	CGGAATGGTATAAAGAATACAAAGAAAACG
	>spacer22
	CCAAGTATCACGCAAAGAAATCAACGAGA
	>spacer23
	TTGACCTGTTTATCCTTGTTAACTAGAATAG
	>spacer24
	AGAGCACTAGCATACTGTTTAGTCCGAACG
	>spacer25
	AGGCAAGGTATTTGATCCAACAGAAGCCAA
	>spacer26
	CATGATTTACAACCACGCGCTAGACCAAG
	>spacer27
	ACCTAGAAGCATTTGAGCGTATATTGATTG
	>spacer28
	AATTTTGCCCCTTCTTTGCCCCTTGACTAG	Streptococcus phage 5093
	>spacer29
	TAATAGTTTACCAAATCGTCCTTGTTCCAA	Streptococcus phage P0095
	>spacer30
	ACCATTAGCAATCATTTGTGCCCATTGAGT	Streptococcus thermophilus bacteriophages: Sfi21 / Sfi19
ASCC 1275 (823246..825392)	>spacer1
	TGTTTGACAGCAAATCAAGATTCGAATTGT
	>spacer2
	AATGACGAGGAGCTATTGGCACAACTTACA	Streptococcus phages: M19 / L5A1 / C0 / 7A5 / 7T / vB_SthS_VA698 / P9902 / P9901 / P7955 / P7954 / P7952 / P7602 / P7134 / P3681 / Abc2 / ALQ13.2
	>spacer3
	CGATTTGACAATCTGCTGACCACTGTTATC
	>spacer4
	ACACTTGGCAGGCTTATTACTCAACAGCGA
	>spacer5
	CTGTTCCTTGTTCTTTTGTTGTATCTTTTC
	>spacer6
	TTCATTCTTCCGTTTTTGTTTGCGAATCCT
	>spacer7
	GCTGGCGAGGAAACGAACAAGGCCTCAACA	Streptococcus phages: MM25 / P7152
	>spacer8
	CATAGAGTGGAAAACTAGAAACAGATTCAA	Streptococcus phages: P7572 / P7571 / P7132 / 53; Streptococcus thermophilus bacteriophage DT1
	>spacer9
	ATAATGCCGTTGAATTACACGGCAAGGTCA
	>spacer10
	GAGCGAGCTCGAAATAATCTTAATTACAAG	Streptococcus phages: P7955 / P7954 / P7953 / P7952; Streptococcus thermophilus temperate bacteriophage O1205
	>spacer11
	GTTCGCTAGCGTCATGTGGTAACGTATTTA
	>spacer12
	GGCGTCCCAATCCTGATTAATACTTACTCG	Streptococcus phages: P7632 / P7631 / CHPC926
	>spacer13
	AACACAGCAAGACAAGAGGATGATGCTATG	Streptococcus phages: M19 / P0094 / P0093 / P0092 / P0091 / CHPC1151 / TP-J34 / 5093
	>spacer14
	CGACACAAGAACGTATGCAAGAGTTCAAG	Streptococcus phages: vB_SthS_VA698 / V2 / MM25 / 31B4 / 9A / P8922 / P8921 / P7954 / P7953 / P7952 / P7632 / P7631 / P7601 / P7154 / P7152 / P7151 / P7134 / P7133 / P7132 / P5652 / P5651 / P3681 / 128 / 53 / CHPC577; Streptococcus thermophilus bacteriophage kappa3 / DT1
	>spacer15
	ACAATTCTTCATCCGGTAACTGCTCAAGTG	Streptococcus phage vB_SthS_VA460
	>spacer16
	AATTAAGGGCATAGAAAGGGAGACAACATG
	>spacer17
	CGATATTTAAAATCATTTTCATAACTTCAT	Streptococcus phage M19
	>spacer18
	GCAGTATCAGCAAGCAAGCTGTTAGTTACT	Streptococcus phages: P9851 / YMC-2011; Streptococcus thermophilus bacteriophage Sfi21
	>spacer19
	ATAAACTATGAAATTTTATAATTTTTAAGA	Streptococcus thermophilus bacteriophage 7201
	>spacer20
	AATAATTTATGGTATAGCTTAATATCATTG	Streptococcus phage P5641
	>spacer21
	TGCATCGAGCACGTTCGAGTTTACCGTTTC	Streptococcus phage P7951
	>spacer22
	TCTATATCGAGGTCAACTAACAATTATGCT	Streptococcus phage P7951
	>spacer23
	AATCGTTCAAATTCTGTTTTAGGTACATTT
	>spacer24
	AATCAATACGACAAGAGTTAAAATGGTCTT	Streptococcus phage 5093
	>spacer25
	GCTTAGCTGTCCAATCCACGAACGTGGATG	Streptococcus phage P7573; Streptococcus thermophilus bacteriophage 7201
	>spacer26
	CAACCAACGGTAACAGCTACTTTTTACAGT
	>spacer27
	ATAACTGAAGGATAGGAGCTTGTAAAGTCT
	>spacer28
	TAATGCTACATCTCAAAGGATGATCCCAGA	Streptococcus thermophilus bacteriophages: Sfi21 / Sfi19
	>spacer29
	AAGTAGTTGATGACCTCTACAATGGTTTAT
	>spacer30
	ACCTAGAAGCATTTGAGCGTATATTGATTG
	>spacer31
	AATTTTGCCCCTTCTTTGCCCCTTGACTAG	Streptococcus phage 5093
	>spacer32
	ACCATTAGCAATCATTTGTGCCCATTGAGT	Streptococcus thermophilus bacteriophages: Sfi21 / Sfi19
MN-BM-A02 (633203..635349)	>spacer1
	TGTTTGACAGCAAATCAAGATTCGAATTGT
	>spacer2
	AATGACGAGGAGCTATTGGCACAACTTACA	Streptococcus phages: M19 / L5A1 / C0 / 7A5 / 7T / vB_SthS_VA698 / P9902 / P9901 / P7955 / P7954 / P7952 / P7602 / P7134 / P3681 / Abc2 / ALQ13.2
	>spacer3
	CGATTTGACAATCTGCTGACCACTGTTATC
	>spacer4
	ACACTTGGCAGGCTTATTACTCAACAGCGA
	>spacer5
	CTGTTCCTTGTTCTTTTGTTGTATCTTTTC
	>spacer6
	TTCATTCTTCCGTTTTTGTTTGCGAATCCT
	>spacer7
	GCTGGCGAGGAAACGAACAAGGCCTCAACA	Streptococcus phages: MM25 / P7152
	>spacer8
	CATAGAGTGGAAAACTAGAAACAGATTCAA	Streptococcus phages: P7572 / P7571 / P7132 / 53; Streptococcus thermophilus bacteriophage DT1
	>spacer9
	ATAATGCCGTTGAATTACACGGCAAGGTCA
	>spacer10
	GAGCGAGCTCGAAATAATCTTAATTACAAG	Streptococcus phages: P7955 / P7954 / P7953 / P7952; Streptococcus thermophilus temperate bacteriophage O1205
	>spacer11
	GTTCGCTAGCGTCATGTGGTAACGTATTTA
	>spacer12
	GGCGTCCCAATCCTGATTAATACTTACTCG	Streptococcus phages: P7632 / P7631 / CHPC926
	>spacer13
	AACACAGCAAGACAAGAGGATGATGCTATG	Streptococcus phages: M19 / P0094 / P0093 / P0092 / P0091 / CHPC1151 / TP-J34 / 5093
	>spacer14
	CGACACAAGAACGTATGCAAGAGTTCAAG	Streptococcus phages: vB_SthS_VA698 / V2 / MM25 / 31B4 / 9A / P8922 / P8921 / P7954 / P7953 / P7952 / P7632 / P7631 / P7601 / P7154 / P7152 / P7151 / P7134 / P7133 / P7132 / P5652 / P5651 / P3681 / 128 / 53 / CHPC577; Streptococcus thermophilus bacteriophage kappa3 / DT1
	>spacer15
	ACAATTCTTCATCCGGTAACTGCTCAAGTG	Streptococcus phage vB_SthS_VA460
	>spacer16
	AATTAAGGGCATAGAAAGGGAGACAACATG
	>spacer17
	CGATATTTAAAATCATTTTCATAACTTCAT	Streptococcus phage M19
	>spacer18
	GCAGTATCAGCAAGCAAGCTGTTAGTTACT	Streptococcus phages: P9851 / YMC-2011; Streptococcus thermophilus bacteriophage Sfi21
	>spacer19
	ATAAACTATGAAATTTTATAATTTTTAAGA	Streptococcus thermophilus bacteriophage 7201
	>spacer20
	AATAATTTATGGTATAGCTTAATATCATTG	Streptococcus phage P5641
	>spacer21
	TGCATCGAGCACGTTCGAGTTTACCGTTTC	Streptococcus phage P7951
	>spacer22
	TCTATATCGAGGTCAACTAACAATTATGCT	Streptococcus phage P7951
	>spacer23
	AATCGTTCAAATTCTGTTTTAGGTACATTT
	>spacer24
	AATCAATACGACAAGAGTTAAAATGGTCTT	Streptococcus phage 5093
	>spacer25
	GCTTAGCTGTCCAATCCACGAACGTGGATG	Streptococcus phage P7573; Streptococcus thermophilus bacteriophage 7201
	>spacer26
	CAACCAACGGTAACAGCTACTTTTTACAGT
	>spacer27
	ATAACTGAAGGATAGGAGCTTGTAAAGTCT
	>spacer28
	TAATGCTACATCTCAAAGGATGATCCCAGA	Streptococcus thermophilus bacteriophages: Sfi21 / Sfi19
	>spacer29
	AAGTAGTTGATGACCTCTACAATGGTTTAT
	>spacer30
	ACCTAGAAGCATTTGAGCGTATATTGATTG
	>spacer31
	AATTTTGCCCCTTCTTTGCCCCTTGACTAG	Streptococcus phage 5093
	>spacer32
	ACCATTAGCAATCATTTGTGCCCATTGAGT	Streptococcus thermophilus bacteriophages: Sfi21 / Sfi19
KLDS SM (1806995..1809141)	>spacer1
	TGTTTGACAGCAAATCAAGATTCGAATTGT
	>spacer2
	AATGACGAGGAGCTATTGGCACAACTTACA	Streptococcus phages: M19 / L5A1 / C0 / 7A5 / 7T / vB_SthS_VA698 / P9902 / P9901 / P7955 / P7954 / P7952 / P7602 / P7134 / P3681 / Abc2 / ALQ13.2
	>spacer3
	CGATTTGACAATCTGCTGACCACTGTTATC
	>spacer4
	ACACTTGGCAGGCTTATTACTCAACAGCGA
	>spacer5
	CTGTTCCTTGTTCTTTTGTTGTATCTTTTC
	>spacer6
	TTCATTCTTCCGTTTTTGTTTGCGAATCCT
	>spacer7
	GCTGGCGAGGAAACGAACAAGGCCTCAACA	Streptococcus phages: MM25 / P7152
	>spacer8
	CATAGAGTGGAAAACTAGAAACAGATTCAA	Streptococcus phages: P7572 / P7571 / P7132 / 53; Streptococcus thermophilus bacteriophage DT1
	>spacer9
	ATAATGCCGTTGAATTACACGGCAAGGTCA
	>spacer10
	GAGCGAGCTCGAAATAATCTTAATTACAAG	Streptococcus phages: P7955 / P7954 / P7953 / P7952; Streptococcus thermophilus temperate bacteriophage O1205
	>spacer11
	GTTCGCTAGCGTCATGTGGTAACGTATTTA
	>spacer12
	GGCGTCCCAATCCTGATTAATACTTACTCG	Streptococcus phages: P7632 / P7631 / CHPC926
	>spacer13
	AACACAGCAAGACAAGAGGATGATGCTATG	Streptococcus phages: M19 / P0094 / P0093 / P0092 / P0091 / CHPC1151 / TP-J34 / 5093
	>spacer14
	CGACACAAGAACGTATGCAAGAGTTCAAG	Streptococcus phages: vB_SthS_VA698 / V2 / MM25 / 31B4 / 9A / P8922 / P8921 / P7954 / P7953 / P7952 / P7632 / P7631 / P7601 / P7154 / P7152 / P7151 / P7134 / P7133 / P7132 / P5652 / P5651 / P3681 / 128 / 53 / CHPC577; Streptococcus thermophilus bacteriophage kappa3 / DT1
	>spacer15
	ACAATTCTTCATCCGGTAACTGCTCAAGTG	Streptococcus phage vB_SthS_VA460
	>spacer16
	AATTAAGGGCATAGAAAGGGAGACAACATG
	>spacer17
	CGATATTTAAAATCATTTTCATAACTTCAT	Streptococcus phage M19
	>spacer18
	GCAGTATCAGCAAGCAAGCTGTTAGTTACT	Streptococcus phages: P9851 / YMC-2011; Streptococcus thermophilus bacteriophage Sfi21
	>spacer19
	ATAAACTATGAAATTTTATAATTTTTAAGA	Streptococcus thermophilus bacteriophage 7201
	>spacer20
	AATAATTTATGGTATAGCTTAATATCATTG	Streptococcus phage P5641
	>spacer21
	TGCATCGAGCACGTTCGAGTTTACCGTTTC	Streptococcus phage P7951
	>spacer22
	TCTATATCGAGGTCAACTAACAATTATGCT	Streptococcus phage P7951
	>spacer23
	AATCGTTCAAATTCTGTTTTAGGTACATTT
	>spacer24
	AATCAATACGACAAGAGTTAAAATGGTCTT	Streptococcus phage 5093
	>spacer25
	GCTTAGCTGTCCAATCCACGAACGTGGATG	Streptococcus phage P7573; Streptococcus thermophilus bacteriophage 7201
	>spacer26
	CAACCAACGGTAACAGCTACTTTTTACAGT
	>spacer27
	ATAACTGAAGGATAGGAGCTTGTAAAGTCT
	>spacer28
	TAATGCTACATCTCAAAGGATGATCCCAGA	Streptococcus thermophilus bacteriophages: Sfi21 / Sfi19
	>spacer29
	AAGTAGTTGATGACCTCTACAATGGTTTAT
	>spacer30
	ACCTAGAAGCATTTGAGCGTATATTGATTG
	>spacer31
	AATTTTGCCCCTTCTTTGCCCCTTGACTAG	Streptococcus phage 5093
	>spacer32
	ACCATTAGCAATCATTTGTGCCCATTGAGT	Streptococcus thermophilus bacteriophages: Sfi21 / Sfi19
ND07 (177242..179388) (rev_com)	>spacer1
	TGTTTGACAGCAAATCAAGATTCGAATTGT
	>spacer2
	AATGACGAGGAGCTATTGGCACAACTTACA	Streptococcus phages: M19 / L5A1 / C0 / 7A5 / 7T / vB_SthS_VA698 / P9902 / P9901 / P7955 / P7954 / P7952 / P7602 / P7134 / P3681 / Abc2 / ALQ13.2
	>spacer3
	CGATTTGACAATCTGCTGACCACTGTTATC
	>spacer4
	ACACTTGGCAGGCTTATTACTCAACAGCGA
	>spacer5
	CTGTTCCTTGTTCTTTTGTTGTATCTTTTC
	>spacer6
	TTCATTCTTCCGTTTTTGTTTGCGAATCCT
	>spacer7
	GCTGGCGAGGAAACGAACAAGGCCTCAACA	Streptococcus phages: MM25 / P7152
	>spacer8
	CATAGAGTGGAAAACTAGAAACAGATTCAA	Streptococcus phages: P7572 / P7571 / P7132 / 53; Streptococcus thermophilus bacteriophage DT1
	>spacer9
	ATAATGCCGTTGAATTACACGGCAAGGTCA
	>spacer10
	GAGCGAGCTCGAAATAATCTTAATTACAAG	Streptococcus phages: P7955 / P7954 / P7953 / P7952; Streptococcus thermophilus temperate bacteriophage O1205
	>spacer11
	GTTCGCTAGCGTCATGTGGTAACGTATTTA
	>spacer12
	GGCGTCCCAATCCTGATTAATACTTACTCG	Streptococcus phages: P7632 / P7631 / CHPC926
	>spacer13
	AACACAGCAAGACAAGAGGATGATGCTATG	Streptococcus phages: M19 / P0094 / P0093 / P0092 / P0091 / CHPC1151 / TP-J34 / 5093
	>spacer14
	CGACACAAGAACGTATGCAAGAGTTCAAG	Streptococcus phages: vB_SthS_VA698 / V2 / MM25 / 31B4 / 9A / P8922 / P8921 / P7954 / P7953 / P7952 / P7632 / P7631 / P7601 / P7154 / P7152 / P7151 / P7134 / P7133 / P7132 / P5652 / P5651 / P3681 / 128 / 53 / CHPC577; Streptococcus thermophilus bacteriophage kappa3 / DT1
	>spacer15
	ACAATTCTTCATCCGGTAACTGCTCAAGTG	Streptococcus phage vB_SthS_VA460
	>spacer16
	AATTAAGGGCATAGAAAGGGAGACAACATG
	>spacer17
	CGATATTTAAAATCATTTTCATAACTTCAT	Streptococcus phage M19
	>spacer18
	GCAGTATCAGCAAGCAAGCTGTTAGTTACT	Streptococcus phages: P9851 / YMC-2011; Streptococcus thermophilus bacteriophage Sfi21
	>spacer19
	ATAAACTATGAAATTTTATAATTTTTAAGA	Streptococcus thermophilus bacteriophage 7201
	>spacer20
	AATAATTTATGGTATAGCTTAATATCATTG	Streptococcus phage P5641
	>spacer21
	TGCATCGAGCACGTTCGAGTTTACCGTTTC	Streptococcus phage P7951
	>spacer22
	TCTATATCGAGGTCAACTAACAATTATGCT	Streptococcus phage P7951
	>spacer23
	AATCGTTCAAATTCTGTTTTAGGTACATTT
	>spacer24
	AATCAATACGACAAGAGTTAAAATGGTCTT	Streptococcus phage 5093
	>spacer25
	GCTTAGCTGTCCAATCCACGAACGTGGATG	Streptococcus phage P7573; Streptococcus thermophilus bacteriophage 7201
	>spacer26
	CAACCAACGGTAACAGCTACTTTTTACAGT
	>spacer27
	ATAACTGAAGGATAGGAGCTTGTAAAGTCT
	>spacer28
	TAATGCTACATCTCAAAGGATGATCCCAGA	Streptococcus thermophilus bacteriophages: Sfi21 / Sfi19
	>spacer29
	AAGTAGTTGATGACCTCTACAATGGTTTAT
	>spacer30
	ACCTAGAAGCATTTGAGCGTATATTGATTG
	>spacer31
	AATTTTGCCCCTTCTTTGCCCCTTGACTAG	Streptococcus phage 5093
	>spacer32
	ACCATTAGCAATCATTTGTGCCCATTGAGT	Streptococcus thermophilus bacteriophages: Sfi21 / Sfi19
DGCC 7710 (636570..638716)	>spacer1
	TGTTTGACAGCAAATCAAGATTCGAATTGT
	>spacer2
	AATGACGAGGAGCTATTGGCACAACTTACA	Streptococcus phages: M19 / L5A1 / C0 / 7A5 / 7T / vB_SthS_VA698 / P9902 / P9901 / P7955 / P7954 / P7952 / P7602 / P7134 / P3681 / Abc2 / ALQ13.2
	>spacer3
	CGATTTGACAATCTGCTGACCACTGTTATC
	>spacer4
	ACACTTGGCAGGCTTATTACTCAACAGCGA
	>spacer5
	CTGTTCCTTGTTCTTTTGTTGTATCTTTTC
	>spacer6
	TTCATTCTTCCGTTTTTGTTTGCGAATCCT
	>spacer7
	GCTGGCGAGGAAACGAACAAGGCCTCAACA	Streptococcus phages: MM25 / P7152
	>spacer8
	CATAGAGTGGAAAACTAGAAACAGATTCAA	Streptococcus phages: P7572 / P7571 / P7132 / 53; Streptococcus thermophilus bacteriophage DT1
	>spacer9
	ATAATGCCGTTGAATTACACGGCAAGGTCA
	>spacer10
	GAGCGAGCTCGAAATAATCTTAATTACAAG	Streptococcus phages: P7955 / P7954 / P7953 / P7952; Streptococcus thermophilus temperate bacteriophage O1205
	>spacer11
	GTTCGCTAGCGTCATGTGGTAACGTATTTA
	>spacer12
	GGCGTCCCAATCCTGATTAATACTTACTCG	Streptococcus phages: P7632 / P7631 / CHPC926
	>spacer13
	AACACAGCAAGACAAGAGGATGATGCTATG	Streptococcus phages: M19 / P0094 / P0093 / P0092 / P0091 / CHPC1151 / TP-J34 / 5093
	>spacer14
	CGACACAAGAACGTATGCAAGAGTTCAAG	Streptococcus phages: vB_SthS_VA698 / V2 / MM25 / 31B4 / 9A / P8922 / P8921 / P7954 / P7953 / P7952 / P7632 / P7631 / P7601 / P7154 / P7152 / P7151 / P7134 / P7133 / P7132 / P5652 / P5651 / P3681 / 128 / 53 / CHPC577; Streptococcus thermophilus bacteriophage kappa3 / DT1
	>spacer15
	ACAATTCTTCATCCGGTAACTGCTCAAGTG	Streptococcus phage vB_SthS_VA460
	>spacer16
	AATTAAGGGCATAGAAAGGGAGACAACATG
	>spacer17
	CGATATTTAAAATCATTTTCATAACTTCAT	Streptococcus phage M19
	>spacer18
	GCAGTATCAGCAAGCAAGCTGTTAGTTACT	Streptococcus phages: P9851 / YMC-2011; Streptococcus thermophilus bacteriophage Sfi21
	>spacer19
	ATAAACTATGAAATTTTATAATTTTTAAGA	Streptococcus thermophilus bacteriophage 7201
	>spacer20
	AATAATTTATGGTATAGCTTAATATCATTG	Streptococcus phage P5641
	>spacer21
	TGCATCGAGCACGTTCGAGTTTACCGTTTC	Streptococcus phage P7951
	>spacer22
	TCTATATCGAGGTCAACTAACAATTATGCT	Streptococcus phage P7951
	>spacer23
	AATCGTTCAAATTCTGTTTTAGGTACATTT
	>spacer24
	AATCAATACGACAAGAGTTAAAATGGTCTT	Streptococcus phage 5093
	>spacer25
	GCTTAGCTGTCCAATCCACGAACGTGGATG	Streptococcus phage P7573; Streptococcus thermophilus bacteriophage 7201
	>spacer26
	CAACCAACGGTAACAGCTACTTTTTACAGT
	>spacer27
	ATAACTGAAGGATAGGAGCTTGTAAAGTCT
	>spacer28
	TAATGCTACATCTCAAAGGATGATCCCAGA	Streptococcus thermophilus bacteriophages: Sfi21 / Sfi19
	>spacer29
	AAGTAGTTGATGACCTCTACAATGGTTTAT
	>spacer30
	ACCTAGAAGCATTTGAGCGTATATTGATTG
	>spacer31
	AATTTTGCCCCTTCTTTGCCCCTTGACTAG	Streptococcus phage 5093
	>spacer32
	ACCATTAGCAATCATTTGTGCCCATTGAGT	Streptococcus thermophilus bacteriophages: Sfi21 / Sfi19
KLDS 3.1003 (1254932..1255890)	>spacer1
	CGATTGGATCACCAAAGCTTTGTCTGATG	Streptococcus phages: P7954 / P7953 / P7952
	>spacer2
	TCAAAAAACTGTGATGAGACTTTAGGTTGG
	>spacer3
	CACTTTCAAGCGATCGAGTCCATTTGTCGT	Streptococcus phages: P7955 / P7954 / P7953 / P7952
	>spacer4
	CTAAAATTGATGTAACAATCAATAAAGGTG
	>spacer5
	CTGTCTGAAAAATAACCGACCATCGTTCGA	Streptococcus thermophilus bacteriophage 7201
	>spacer6
	GTCAGTACCATCAATATGCTGGACGGCACG	Streptococcus thermophilus bacteriophages: 7201 / Sfi19
	>spacer7
	ATGGTAGCTCCGCTCTTGGCTTGTGCTTCA	Streptococcus thermophilus bacteriophage 7201
	>spacer8
	TGAGGAATTATTCAGACAGTTTTTAAACTA	Streptococcus phage TP-J34
	>spacer9
	CCTTCCTAAGTGCATGAAAATCGCAAACGG	Streptococcus thermophilus bacteriophages: Sfi11 / 7201 / Sfi21 / Sfi19
	>spacer10
	CAAAGTCCTCTTCGTATTGATCATAGCTTC	Lactococcus lactis subsp. lactis bv. diacetylactis FM03 plasmid pLd7 / Lactococcus lactis subsp. cremoris JM2 plasmid pJM2C / Lactococcus lactis subsp. lactis 229 plasmid p229C / Lactococcus garvieae IPLA 31405 plasmid pLG42 / Lactococcus lactis subsp. lactis ILIBB-JZK plasmid pIBB-JZK / Lactococcus lactis subsp. lactis bv. diacetylactis plasmid pVF21 / Lactococcus lactis subsp. lactis IL594 plas…
	>spacer11
	AGGTCGAAGTTTGGGAAATTGACTTGGCTG	Streptococcus phage TP-J34; Streptococcus thermophilus bacteriophage Sfi11 / O1205
	>spacer12
	TTGATAAGTCTTATATTGTCACAGGAAAGA
	>spacer13
	TAGACATCTACGACTTATTTTTAAAGGCAG
	>spacer14
	GACGTGTCAACACGGTTAGTTAACATTGAT
B59671 (1815698..1816920)	>spacer1
	AAATTGATATCTATACATCAAGCTGGATAA	Streptococcus phages: P9903 / P9902 / P7602 / 73
	>spacer2
	CTGAATAGTATTTCTTGATTGGCTCGTTGC	Streptococcus thermophilus bacteriophages: 7201 / Sfi19
	>spacer3
	TGATTTTCTCAAACCAGAGCGCAGCACCCA
	>spacer4
	TAGACAAAAACCTTCTATCTCCCAAAACTG
	>spacer5
	TGGCTAAGATAGGGTATGCGCGTGTAAGTA
	>spacer6
	GTGTTCCAGCGTCTTTGTATTTATTTCGGA	Streptococcus phages: L5A1 / C0 / A0
	>spacer7
	CTTTGTTTCCGCCTTTGACCACGTCGGAAC
	>spacer8
	TAATCACCCCTTTTTCTAGCTCTTGATTGA
	>spacer9
	AAGTTGATCGTATCTATTTAGAATATCGCA	Streptococcus phages: P9852 / P7955 / P7953 / P7951 / P7574 / P7572 / P7571 / TP-J34 / 858; Streptococcus thermophilus bacteriophages: 2972 / Sfi11 / Sfi21 / Sfi19
	>spacer10
	TGCTATGCAAATAGCAGGAGCGATGATTG	Streptococcus phages: P7955 / P7954 / P7953 / P7952 / P4761 / TP-778L / TP-J34; Streptococcus thermophilus bacteriophages: Sfi11 / O1205
	>spacer11
	CATATCTGACAGAAACAGTATCGTTGGCTT	Lactococcus phage 712
	>spacer12
	AATCTTACGACCCTAACATTTTCTACCAAC
	>spacer13
	AGATAGCCACCAAGCGTTTCAGCTATGCTA	Streptococcus thermophilus bacteriophage Sfi19
	>spacer14
	TACTTGAACACCCTTCAATCCTGTTTGATA	Streptococcus phages: L5A1 / C0 / A0 / P9854 / P9851 / P7573 / vB_SthS_VA460 / P7602 / P5641 / P3684 / P3681
	>spacer15
	TTTTCAGCTTCAGTCGTTTCATATGTATAT
	>spacer16
	AAGGTCTATACCCTAATATAGCTGAACACG
	>spacer17
	ACATGCTTGATGTTTGTGTATTTAGTAACA
	>spacer18
	GAGTTGGTGACCATTTGCACCACTTTATTT
NCTC12958 (803250..805592)	>spacer1
	ATATACGGACTCATCTAGTGAAACTGGGTA	Streptococcus thermophilus bacteriophage 7201
	>spacer2
	GAATCTGTTAAAACATTGATTTTTTATATT
	>spacer3
	TGTGCCAGCGTCATTCAAAGCAATTGCTGA	Streptococcus phages: 9A / P3684 / P3681 / P0091; Streptococcus thermophilus bacteriophage Sfi21
	>spacer4
	CAAAGCTATCGAATATATCGCAGAGGCAAG	Streptococcus phages: P0095 / TP-J34 / 5093 / P7602; Streptococcus thermophilus bacteriophage Sfi19
	>spacer5
	TCTTTGTGATATAAATGAAAAAAAAGACTA
	>spacer6
	CAAGCGTAAGTTTTACCGTTAGAACGTTCA
	>spacer7
	GATAGCGCCTTTGAATATTAATGGTGTTC	Streptococcus phages: vB_SthS_VA214 / P7955 / P7953 / P7952 / P7951 / P0091 / Abc2
	>spacer8
	TAGACTTTACTAATTCTCAAGTAAATATAT	Streptococcus phages: P9903 / P9902 / 73 / TP-778L / TP-J34
	>spacer9
	TTCTTTCAGGTATGAAATTAGAAACACTTG
	>spacer10
	TTTCACAGTCAACACATCTCCGACACGCTT	Streptococcus phages: P7602 / M19 / vB_SthS_VA698 / ALQ13.2
	>spacer11
	ATGAGTTGGTAGATGTTAAAGCATCAACTG
	>spacer12
	GTATATACAGAACTTGGAGTTTTAACGCCT	Streptococcus phages: P7954 / P7953 / P7952 / P3684 / CHPC926
	>spacer13
	CATACACCACCAGCAAAGTCTTTACCAATG
	>spacer14
	GATGATTTTGAGTTTAAGGTTTTTAAACAA	Streptococcus phage D4276
	>spacer15
	AGACCATGAAGGAAGGCGTTGACAAATTC	Streptococcus phages: P7602 / P3684 / P3681
	>spacer16
	AGAAATTCATGATAAGTGGTCTGAAACTTG	Streptococcus phage vB_SthS_VA460
	>spacer17
	AGTCAACTTACTATGTTAAAATAAGACAGG
	>spacer18
	GACTTGAACCTGAATTAATCAAGGTAGCCA	Streptococcus phages: STP2 / P0094 / P0093 / P0091 / CHPC1151 / 9871
	>spacer19
	TGTACTCTATTGATTGCTTCATCTTTATTA	Streptococcus thermophilus bacteriophage 7201
	>spacer20
	CTTTCAAGATACTCATCAACCATTGATGTCA
	>spacer21
	AAAAGGTGCGTATGAAACTCATCCCAGCGG
	>spacer22
	CTATGTCTTTACTGTTCTTCCAAAACCACC	Streptococcus phages: P0094 / P0093 / 5093
	>spacer23
	TTTGTTTGCGTTCACTTAGTTTATACTGAG	Streptococcus phages: D1811 / D1024 / STP2 / STP1 / vB_SthS_VA460 / vB_SthS_VA214 / P9854 / P9853 / P9852 / P9851 / P8921 / P7955 / P7573 / P7572 / P7571 / P7152 / P7151 / P7134 / P5652 / P5651 / P4761 / P0095 / P0094 / P0093 / P0092 / CHPC1151 / CHPC926 / CHPC577 / 9874 / 9873 / 9872 / 9871 / ALQ13.2 / 858; Streptococcus thermophilus bacteriophages: 2972 / DT1 / J1 / ST3 / S92 / S3b
	>spacer24
	AATTTGTCATTGACATTTACCACCGTCCTG	Streptococcus phages: P9854 / P9851 / D4276
	>spacer25
	TGGCGCAATGGTTTTAAATCATATGCCTT	Streptococcus thermophilus bacteriophage 7201
	>spacer26
	CATGGCCTTGTATTTTCGAAAGAGCATAAG	Streptococcus phage P4761
	>spacer27
	TATCCTCTCGTTGATAATATGCTTAATTCT
	>spacer28
	TTGATAGACCAAAACACTTCTGTGAGCAGC
	>spacer29
	TGCCTTTCTTCAAAGAAGCTATGCTTGTTA	Streptococcus phages: P7955 / P7953 / P7952
	>spacer30
	CTGCATCAAACGATGGCTTTGTCATCGGT
	>spacer31
	AATATAATCGACGAGTAAGAGCGAGAGACG
	>spacer32
	CGCGCACCGTTGACAAGTGTCAAGTTATCG	Streptococcus phage ALQ13.2
	>spacer33
	GATGATTTTGAGTTTAAGGTTTTTAAACAA	Streptococcus phage D4276
	>spacer34
	TCATACTAAAACTGGATAAACAATATTACA
	>spacer35
	TGACACGGCTGGCAGTGTTTCGGTTGGTGG	Streptococcus phages: M19 / P9903 / P9902 / ALQ13.2; Streptococcus thermophilus bacteriophages: DT1.1 / DT1.2 / DT1.3 / DT1.4 / DT1.5 / MD4 / DT1
Spacers of CRISPR2
Strain (coordinates of CRISPR array)	spacers	1st blastn result (excluding same species)
LMG 18311 (863999..864323)	>spacer1
	GCTTTCTAGCTCGCTATAATTACCCATTCCTAGAAA
	>spacer2
	TTTGAATAGTCTTTGAATCGCATTTGAACCATATA	Streptococcus phages: 9A / P8922 / P8921 / P7953 / P7154 / P7151 / P5652 / P5651 / 9874 / ALQ13.2
	>spacer3
	AGGTTTTTTGCCATAGATTTTCCAAGACCTTCCCAACT
	>spacer4
	GCTTTCTAGCTCGCTATAATTACCCATTCCTAGAAA
KLDS 3.1003 (1506836..1507597)	>spacer1
	CCTACAATAGCATTCATTGTAAATTGTTGCATTTTT
	>spacer2
	TCATCTGGTAACTGCTCTAGTGTTAGTATGCGATTG	Streptococcus phages: P7574 / vB_SthS_VA460 / P0095 / P7602 / P7601 / P7571 / P7132 / 53; Streptococcus thermophilus bacteriophage DT1
	>spacer3
	TCACGGTCCTTTTTCATCTGTCTCAAAATTTCAA	Streptococcus phage 5093
	>spacer4
	TGTTCCATATTGGTAGCATTAATGAATCTGTACTTATCT	Streptococcus thermophilus bacteriophage Sfi21
	>spacer5
	ACCCCAACTGGTTTGTAGGTTATTTCCATTGGTAGTCC
	>spacer6
	GCTTTCTAGCTCGCTATAATTACCCATTCCTAGAAA
	>spacer7
	TGAAAGCACTATGGAATGATACATTAGTAGTTCTGG	Streptococcus phage 5093
	>spacer8
	GACAGAATTGTGGACACTGCCATACTAATAGATGTACAG	Streptococcus phages: TP-778L / TP-J34
	>spacer9
	AGATGTTTTCATGGTATACTCCTTTTAAGTTGTTTT	Streptococcus thermophilus bacteriophage O1205
	>spacer10
	GCTTTCTAGCTCGCTATAATTACCCATTCCTAGAAA
JIM 8232 (969817..971087)	>spacer1
	CTTGATTCTAACGCTACTTCTAAATAAGCGTTAGCAATG	Streptococcus phage 5093
	>spacer2
	AGTTCTAAAGCATTCATCATATGTTTATGTTCTTTA	Streptococcus phages: vB_SthS_VA214 / P0095 / P0091 / CHPC1151
	>spacer3
	TTCCAAAATTAATTCTTTGATGTCGTTATTTATTA	Streptococcus virus 9874
	>spacer4
	ATCCAGTTCTGCAAAGAACAGCATAGAGGTTTTACC	Streptococcus phage ALQ13.2
	>spacer5
	TTTTAATTCTTCTAAGTTATCGCTGAATGGATAGAAC
	>spacer6
	ACTGTTTCTGTTTGCTTGTTTGACCAAATCCAGTTAA	Streptococcus phages: P7572 / P7571; Streptococcus thermophilus bacteriophage DT1
	>spacer7
	AATTGGATAGCGCAGGCTACCAAACTTCTAAGATGATT
	>spacer8
	TCTTGTTGGCGTTTTTCAATAACTTTCTTATCAATCA	Streptococcus phages: vB_SthS_VA460 / D4276 / TP-J34; Streptococcus thermophilus bacteriophages: Sfi11 / SFi18 / Sfi19
	>spacer9
	TTCCAAAATTAATTCTTTGATGTCGTTATTTATTA	Streptococcus virus 9874
	>spacer10
	ATCCAGTTCTGCAAAGAACAGCATAGAGGTTTTACC	Streptococcus phage ALQ13.2
	>spacer11
	TTTTAATTCTTCTAAGTTATCGCTGAATGGATAGAAC
	>spacer12
	ACTGTTTCTGTTTGCTTGTTTGACCAAATCCAGTTAA	Streptococcus phages: P7572 / P7571; Streptococcus thermophilus bacteriophage DT1
	>spacer13
	AATTGGATAGCGCAGGCTACCAAACTTCTAAGATGATT
	>spacer14
	TCTTGTTGGCGTTTTTCAATAACTTTCTTATCAATCA	Streptococcus phages: vB_SthS_VA460 / D4276 / TP-J34; Streptococcus thermophilus bacteriophages: Sfi11 / SFi18 / Sfi19
	>spacer15
	TGAGAAACATAGAAAACATGGTATGAATTATCATAG	Streptococcus phages: P9854 / P9851 / P7574 / P7573; Streptococcus thermophilus bacteriophage 7201
	>spacer16
	CCATATACTCTAGCATTTCCATACACTTTAGCATTT
	>spacer17
	TTAACGAAGTTGTCATCAATCATTACTCCTTGCCTG	Streptococcus phages: P7954 / P7953 / P7951 / P7574 / P7573 / P7132; Streptococcus thermophilus bacteriophages: Sfi11 / SFi18 / Sfi19
LMD-9 (897070..897328)	>spacer1
	GCTTTCTAGCTCGCTATAATTACCCATTCCTAGAAA
	>spacer2
	TCAAAATATGTTATTACCTTGTATTTCATAATTCAATTAA	Streptococcus phage 73
	>spacer3
	CCACTTGCTGTGTACATCCTACCAGTTCCGCCTATGATG	Streptococcus phages: P9903 / P9902 / 73; Streptococcus thermophilus bacteriophage DT1
ASCC 1275 (1074866..1075124)	>spacer1
	GCTTTCTAGCTCGCTATAATTACCCATTCCTAGAAA
	>spacer2
	TCAAAATATGTTATTACCTTGTATTTCATAATTCAATTAA	Streptococcus phage 73
	>spacer3
	CCACTTGCTGTGTACATCCTACCAGTTCCGCCTATGATG	Streptococcus phages: P9903 / P9902 / 73; Streptococcus thermophilus bacteriophage DT1
SMQ-301 (897843..898101)	>spacer1
	GCTTTCTAGCTCGCTATAATTACCCATTCCTAGAAA
	>spacer2
	TCAAAATATGTTATTACCTTGTATTTCATAATTCAATTAA	Streptococcus phage 73
	>spacer3
	CCACTTGCTGTGTACATCCTACCAGTTCCGCCTATGATG	Streptococcus phages: P9903 / P9902 / 73; Streptococcus thermophilus bacteriophage DT1
MN-BM-A02 (884614..884872)	>spacer1
	GCTTTCTAGCTCGCTATAATTACCCATTCCTAGAAA
	>spacer2
	TCAAAATATGTTATTACCTTGTATTTCATAATTCAATTAA	Streptococcus phage 73
	>spacer3
	CCACTTGCTGTGTACATCCTACCAGTTCCGCCTATGATG	Streptococcus phages: P9903 / P9902 / 73; Streptococcus thermophilus bacteriophage DT1
KLDS SM (199829..200087)	>spacer1
	GCTTTCTAGCTCGCTATAATTACCCATTCCTAGAAA
	>spacer2
	TCAAAATATGTTATTACCTTGTATTTCATAATTCAATTAA	Streptococcus phage 73
	>spacer3
	CCACTTGCTGTGTACATCCTACCAGTTCCGCCTATGATG	Streptococcus phages: P9903 / P9902 / 73; Streptococcus thermophilus bacteriophage DT1
ND07 (1779078..1779330) (rev_com)	>spacer1
	GGAAACGCTTTCTAGCTCGCTATAATTACCCATTCCTAGAAA
	>spacer2
	GGAAACTCAAAATATGTTATTACCTTGTATTTCATAATTCAATTAA	Streptococcus phage 73
	>spacer3
	GGAAACCCACTTGCTGTGTACATCCTACCAGTTCCGCCTATGATG	Streptococcus phages: P9903 / P9902 / 73; Streptococcus thermophilus bacteriophage DT1
DGCC 7710 (887984..888242)	>spacer1
	GCTTTCTAGCTCGCTATAATTACCCATTCCTAGAAA
	>spacer2
	TCAAAATATGTTATTACCTTGTATTTCATAATTCAATTAA	Streptococcus phage 73
	>spacer3
	CCACTTGCTGTGTACATCCTACCAGTTCCGCCTATGATG	Streptococcus phages: P9903 / P9902 / 73; Streptococcus thermophilus bacteriophage DT1
GABA (889434..889684)	>spacer1
	TGAGTGCTTATCAAAAGCTAGAAAAGAGTTATAAAG	Lactococcus lactis subsp. lactis bv. diacetylactis FM03 plasmid pLd7 / Lactococcus lactis subsp. cremoris JM2 plasmid pJM2A / Lactococcus lactis subsp. lactis 229 plasmid p229C / Lactococcus lactis subsp. lactis IL594 plasmid pIL6 / Lactococcus lactis subsp. lactis CV56 plasmid pCV56B / Lactococcus lactis bv. diacetylactis, plasmid pND861
	>spacer2
	CAATCCACAATCTAATGCGATACCCACGGTAATTA	Streptococcus phage YMC-2011
	>spacer3
	TGTCCGCTGGATATTTATCGCTTTAGTAATTTTCAT	Streptococcus phages: P7602 / P7134 / P7133 / P3681
ST3 (914332..914582)	>spacer1
	TGAGTGCTTATCAAAAGCTAGAAAAGAGTTATAAAG	Lactococcus lactis subsp. lactis bv. diacetylactis FM03 plasmid pLd7 / Lactococcus lactis subsp. cremoris JM2 plasmid pJM2A / Lactococcus lactis subsp. lactis 229 plasmid p229C / Lactococcus lactis subsp. lactis IL594 plasmid pIL6 / Lactococcus lactis subsp. lactis CV56 plasmid pCV56B / Lactococcus lactis bv. diacetylactis, plasmid pND861
	>spacer2
	CAATCCACAATCTAATGCGATACCCACGGTAATTA	Streptococcus phage YMC-2011
	>spacer3
	TGTCCGCTGGATATTTATCGCTTTAGTAATTTTCAT	Streptococcus phages: P7602 / P7134 / P7133 / P3681
Spacers of CRISPR3
Strain (coordinates of CRISPR array)	spacers	1st blastn result (excluding same species)
KLDS 3.1003 (121258..122019)	>spacer1
	TGACGAAACGGAAAGTAATACAGATAACT
	>spacer2
	AGCTAGACATATCAGCACCCCATGACATT	Streptococcus thermophilus bacteriophage 7201
	>spacer3
	TGACCATATTATAGGTTGAGTTGGTTTTT
	>spacer4
	CGTGTCCACCAGCTCCACCTGAACTTGCC	Streptococcus phage TP-J34
	>spacer5
	AATCAGAAATCAGTTTATTGATTCCATCG	Streptococcus phages: P8921 / P7152; Streptococcus thermophilus bacteriophage Sfi21
	>spacer6
	CTTTACCTGGGAAACCATCATTACCTCT
	>spacer7
	CCACTGGTTGCGTTTGGGATGTTATCAGC
	>spacer8
	ACTTAAACGACATCATTTTTATAACTTCG	Streptococcus virus 9874
	>spacer9
	TGATGTAAGATAATTTAGTTCCTAATTGT
	>spacer10
	CACACTTATTCCGTGATGAAGTCGGTTGG	Streptococcus phages: P0095 / P0094 / P0093 / P0092 / CHPC1151 / 5093
	>spacer11
	AGCTTTTTGGAATATCGAAATTAACCGTT
ND03 (1363057..1364415)	>spacer1
	ATAAGATTGAAACATACTTGTGCAAGTGTG	Streptococcus phage D4276
	>spacer2
	AATTATCTTGGTAGAAAACTTTATTATTTA
	>spacer3
	TCTCTGTATAGAGTGTATTTATCGCTGTCCG	Streptococcus phages: 9A / vB_SthS_VA460 / P8922 / P7154 / P5652 / P5651 / P4761 / P0094 / P0093 / CHPC1151 / TP-778L; Streptococcus thermophilus bacteriophage 7201
	>spacer4
	TAAGTTCACTACGTGCCATTTCAAGGCTAAG
	>spacer5
	ATAACGGTCAAAATATAGCTTACTTAGCTT
	>spacer6
	ATGCAATAAAATCGTGCTACGGGCGTTTTA	Streptococcus thermophilus bacteriophage 7201
	>spacer7
	TTTTTATTTTATAGTTTGCGTGGTCTAGTG	Streptococcus phages: MM25 / L5A1 / C0 / A0 / P9854 / P9853 / P9852 / P9851 / P8922 / P8921 / P7633 / P7602 / P7601 / P7574 / P7573 / P7572 / P7571 / P7154 / P7152 / P7151 / P7134 / P7133 / P7132 / P5652 / P5651 / P3684 / P0094 / P0093 / P0092 / P0091 / 53 / CHPC1151; Streptococcus thermophilus bacteriophages: 2972 / 7201
	>spacer8
	ATAACGGTCAAAATATAGCTTACTTAGCTT
	>spacer9
	ATGCAATAAAATCGTGCTACGGGCGTTTTA	Streptococcus thermophilus bacteriophage 7201
	>spacer10
	GTATCGACGTTCGGACATATCCTAGCAAAA	Streptococcus phages: P7602 / P5641
	>spacer11
	AGCGTAGCGTAGTGTATGTGTAGCGCCACC	Streptococcus phage P3681; Streptococcus thermophilus bacteriophage 7201
	>spacer12
	CCACTAGCATCATATTCTTTTGACTTAGAA	Streptococcus phage P7633
	>spacer13
	ATGTACTTCGAATTATTCAATTTTAAGAAG	Streptococcus thermophilus bacteriophage O1205
	>spacer14
	TTAGGTCCAGGTACACCTTGGTCACCTCTAG	Streptococcus phages: P9852 / TP-778L / 858; Streptococcus thermophilus bacteriophage 2972
	>spacer15
	GGTCTTTCCGAATCCATTTATTAGATTGAG	Streptococcus phages: P98523 / P9852 / P7572 / P7571 / ALQ13.2 / 858; Streptococcus thermophilus bacteriophage 2972
	>spacer16
	AGGTGTGGCTACGGATTGAAACTGCTAACG	Streptococcus phages: V2 / STP2 / STP1 / R1 / MM25 / L5A1 / C0 / B5 / B0 / 31B4 / 9A / 7A5 / A0 / 7T / vB_SthS_VA698 / P9903 / P9902 / P9901 / P8922 / P7633 / P7632 / P7631 / P7602 / P7601 / P7574 / P7572 / P7571 / P7154 / P7133 / P5641 / P3684 / P3681 / P0095 / D4276 / 128 / 53 / CHPC926 / CHPC577
	>spacer17
	CACAAAAGCCCAAAAATAGACAAGCCATTC
	>spacer18
	TTTAAGTTGTTTTATTAAGCATAGGCCGTT	Streptococcus thermophilus bacteriophage O1205
	>spacer19
	TTTCTATGGTACACACCTAAACGAACACAA	Streptococcus phages: vB_SthS_VA214 / P5641 / P3684 / P3681 / P0091; Streptococcus thermophilus bacteriophage 7201
	>spacer20
	GATAATCAAGGGGGCTTTTTTGATATTACT	Streptococcus phages: 9A / P9903 / P8922 / P7633 / P7632 / P7631 / P7154 / P7152 / P7151 / P5652 / P5651 / P3684
APC151 (575011.. 576303)	>spacer1
	ATAAGATTGAAACATACTTGTGCAAGTGTG	Streptococcus phage D4276
	>spacer2
	AATTATCTTGGTAGAAAACTTTATTATTTA
	>spacer3
	TCTCTGTATAGAGTGTATTTATCGCTGTCCG	Streptococcus phages: 9A / vB_SthS_VA460 / P8922 / P7154 / P5652 / P5651 / P4761 / P0094 / P0093 / CHPC1151 / TP-778L; Streptococcus thermophilus bacteriophage 7201
	>spacer4
	TAAGTTCACTACGTGCCATTTCAAGGCTAAG
	>spacer5
	ATAACGGTCAAAATATAGCTTACTTAGCTT
	>spacer6
	TTTTTATTTTATAGTTTGCGTGGTCTAGTG	Streptococcus phages: MM25 / L5A1 / C0 / A0 / P9854 / P9853 / P9852 / P9851 / P8922 / P8921 / P7633 / P7602 / P7601 / P7574 / P7573 / P7572 / P7571 / P7154 / P7152 / P7151 / P7134 / P7133 / P7132 / P5652 / P5651 / P3684 / P0094 / P0093 / P0092 / P0091 / 53 / CHPC1151; Streptococcus thermophilus bacteriophages: 2972 / 7201
	>spacer7
	ATAACGGTCAAAATATAGCTTACTTAGCTT
	>spacer8
	ATGCAATAAAATCGTGCTACGGGCGTTTTA	Streptococcus thermophilus bacteriophage 7201
	>spacer9
	GTATCGACGTTCGGACATATCCTAGCAAAA	Streptococcus phages: P7602 / P5641
	>spacer10
	AGCGTAGCGTAGTGTATGTGTAGCGCCACC	Streptococcus phage P3681; Streptococcus thermophilus bacteriophage 7201
	>spacer11
	CCACTAGCATCATATTCTTTTGACTTAGAA	Streptococcus phage P7633
	>spacer12
	ATGTACTTCGAATTATTCAATTTTAAGAAG	Streptococcus thermophilus bacteriophage O1205
	>spacer13
	TTAGGTCCAGGTACACCTTGGTCACCTCTAG	Streptococcus phages: P9852 / TP-778L / 858; Streptococcus thermophilus bacteriophage 2972
	>spacer14
	GGTCTTTCCGAATCCATTTATTAGATTGAG	Streptococcus phages: P98523 / P9852 / P7572 / P7571 / ALQ13.2 / 858; Streptococcus thermophilus bacteriophage 2972
	>spacer15
	AGGTGTGGCTACGGATTGAAACTGCTAACG	Streptococcus phages: V2 / STP2 / STP1 / R1 / MM25 / L5A1 / C0 / B5 / B0 / 31B4 / 9A / 7A5 / A0 / 7T / vB_SthS_VA698 / P9903 / P9902 / P9901 / P8922 / P7633 / P7632 / P7631 / P7602 / P7601 / P7574 / P7572 / P7571 / P7154 / P7133 / P5641 / P3684 / P3681 / P0095 / D4276 / 128 / 53 / CHPC926 / CHPC577
	>spacer16
	CACAAAAGCCCAAAAATAGACAAGCCATTC
	>spacer17
	TTTAAGTTGTTTTATTAAGCATAGGCCGTT	Streptococcus thermophilus bacteriophage O1205
	>spacer18
	TTTCTATGGTACACACCTAAACGAACACAA	Streptococcus phages: vB_SthS_VA214 / P5641 / P3684 / P3681 / P0091; Streptococcus thermophilus bacteriophage 7201
	>spacer19
	GATAATCAAGGGGGCTTTTTTGATATTACT	Streptococcus phages: 9A / P9903 / P8922 / P7633 / P7632 / P7631 / P7154 / P7152 / P7151 / P5652 / P5651 / P3684
LMD-9 (1377229..1377794)	>spacer1
	ACAATTATTTTTCAATGAAATTAATACTAT
	>spacer2
	TTTAAAGTAGTTTTATCTTGATAAAGTTCT
	>spacer3
	TTTATGACAAAAGCAACTAACGAATATGAG	Streptococcus phages: V2 / STP2 / STP1 / R1 / B5 / B0 / 31B4 / 16B8 / 9B4 /7A5 / 7T / vB_SthS_VA460 / vB_SthS_VA698 / P8922 / P7632 / P7631 / P7602 / P7154 / P7152 / P7151 / P5651 / P3684 / P3681 / 128; Streptococcus thermophilus bacteriophage Sfi19
	>spacer4
	GTGTCTCCAATGAGGACAATATTGTACTCTGT	Streptococcus phage TP-J34
	>spacer5
	TTAATCATGGCTACTGCGGTTTCCCAAACA	Streptococcus phages: M19 / A9 / P8922 / P7633 / P7632 / P7631 / P7154 / P7152 / P5652 / P5651 / P3684 / P3681 / 128; Streptococcus thermophilus bacteriophage 7201
	>spacer6
	TATATGGGCGTATGGAGAGCCACGACAAGG	Streptococcus phages: 16B8 / 7T
	>spacer7
	TAAGTTTTCGTCTTGGATACCACTCATTGA
	>spacer8
	TAAGTACTCGTACAGTGAACCTTTTTCACC
SMQ-301 (1383838..1384867)	>spacer1
	ACAATTATTTTTCAATGAAATTAATACTAT
	>spacer2
	TTTAAAGTAGTTTTATCTTGATAAAGTTCT
	>spacer3
	TTGCCTTGAGCTTGTATCACTTTTATTATT	Streptococcus thermophilus bacteriophage Sfi19
	>spacer4
	GTAACAACTGAGTTAAAGTTAGAAGATTCA	Streptococcus phage 858
	>spacer5
	TTTATGACAAAAGCAACTAACGAATATGAG	Streptococcus phages: V2 / STP2 / STP1 / R1 / B5 / B0 / 31B4 / 16B8 / 9B4 /7A5 / 7T / vB_SthS_VA460 / vB_SthS_VA698 / P8922 / P7632 / P7631 / P7602 / P7154 / P7152 / P7151 / P5651 / P3684 / P3681 / 128; Streptococcus thermophilus bacteriophage Sfi19
	>spacer6
	GATGGCTTAAAAGGCACGCTCGTTTCAATA
	>spacer7
	CTATAGTTGTAATCTTCGCCATCGTAAGTAT	Streptococcus phages: vB_SthS_VA460 / P0091
	>spacer8
	TACTCATTAGTAAAAACGCCTTTTTCCAAT
	>spacer9
	CTATAGTTGTAATCTTCGCCATCGTAAGTAT	Streptococcus phages: vB_SthS_VA460 / P0091
	>spacer10
	TACTCATTAGTAAAAACGCCTTTTTCCAAT
	>spacer11
	GGTTTTCCTGGAATACCGTCTCGTCCATCA	Streptococcus phages: P9854 / P9853 / P9852
	>spacer12
	GTGTCTCCAATGAGGACAATATTGTACTCTGT	Streptococcus phage TP-J34
	>spacer13
	TTAATCATGGCTACTGCGGTTTCCCAAACA	Streptococcus phages: M19 / A9 / P8922 / P7633 / P7632 / P7631 / P7154 / P7152 / P5652 / P5651 / P3684 / P3681 / 128; Streptococcus thermophilus bacteriophage 7201
	>spacer14
	TTACCAGTAAAATCATATCTAACCGTCAGA	Streptococcus phages: vB_SthS_VA214 / P0091
	>spacer15
	TCATCAAAACATGAATATGAGGGTGATATG	Streptococcus pneumoniae plasmids: pPR3 / pSMB1 / pDP1
MN-ZLW-002 (1372720..1374472)	>spacer1
	GCTCCACCAGAGGTAGACATATCAGCACCC	Streptococcus phage vB_SthS_VA460; Streptococcus thermophilus bacteriophage 7201
	>spacer2
	GCCTGATAGTACAAGTCGTACAGCTTGTTA	Streptococcus phage D4276
	>spacer3
	ATGTACTTCGTTAATATTCAATTTTTAAGA	Streptococcus phage vB_SthS_VA460
	>spacer4
	TTACGTGACCCATACATTGAATAGGTCAAT	Streptococcus phages: CHPC926 / TP-778L / 858
	>spacer5
	GTTCTTATGCGTGTTATAAGCTGAAAGTTC
	>spacer6
	CTATTCTGCGTTAGATTTCAAAGTTACCAG
	>spacer7
	AGCCAAGTTGTCTTTTTCGATACAGACCGT
	>spacer8
	ACATATCTAATGACATTCATGTCTGGGTTG	Streptococcus phage P0091
	>spacer9
	TCGGTTTTCGACTTCATAAGTTTCTTGTTC
	>spacer10
	CTTCAATTATTTATTTGTCGTCCAGTGCTT
	>spacer11
	CTTGTTACACACATGTATTTAGATGATTTT	Streptococcus phages: MM25 / L5A1 / C0 / 31B4 / 7A5 / A0 / vB_SthS_VA698 / P9903 / P9902 / P9901 / P9853 / P9852 / P9851 / P7572 / P7571 / P7134 / P7132 / 53 / 73 / Abc2 / 858; Streptococcus thermophilus bacteriophage 2972
	>spacer12
	CTGACCGTTAGGATTTCCATATGCGTCAGG
	>spacer13
	GAGACCTCAGCGTCACCAGAGACCCTAGCG	Streptococcus thermophilus bacteriophages: Sfi18 / Sfi19
	>spacer14
	TCCTTACCTGGCAAGCCATCATTTCCATCG	Streptococcus phage P0091
	>spacer15
	CTGACTGTGAACGGTGTTCAGAAAAACACT	Streptococcus phages: P3684 / D4276
	>spacer16
	TTAGCGCAACCGTTAATTTGACAATTCATA	Streptococcus phages: CHPC926 / CHPC577 / 9874 / 9873 / 9872 / 9871
	>spacer17
	ATACGACAACCATTCAAGAGCATAAACTCG	Streptococcus phage 5093
	>spacer18
	GAGAAACTGAAGAACATTCCTGCTTTAAAT	Streptococcus phage P7602
	>spacer19
	TTCAATGTGGTATTATTAGGGTTTTCACCC	Streptococcus phages: V2 / STP2 / STP1 / R1 / MM25 / M19 / L5A1 / C0 / B5 / B0 / 31B4 / 16B8 / 9B4 / 7A5 / A0 / 7T / vB_SthS_VA698 / P9903 / P9902 / P8922 / P8921 / P7602 / P7154 / P7152 / P7151 / P7134 / P7133 / P7132 / P5652 / P5651 / P5641 / P3681 / 128 / 53 / 73 / Abc2; Streptococcus thermophilus bacteriophage DT1
	>spacer20
	TTTACAAGTGTCCATGAGTAATCGCTAGGA	Streptococcus phages: P9854 / P9852 / P9851 / P5641 / TP-778L / 858; Streptococcus thermophilus bacteriophage 2972
	>spacer21
	TTATTTCCTTCAGCTTTACCTTCAGAGATA
	>spacer22
	TCAGTTGAAAGGCCTTCTGGACCTTTAATA	Streptococcus phages: V2 / R1 / M19 / C0 / 31B4 / 16B8 / 9B4 / 9A / A0 / 7T / vB_SthS_VA460 / vB_SthS_VA214 / P9851 / P7633 / P7601 / P7132 / P5641 / P3684 / P3681 / 128 / 53 / 73
	>spacer23
	TTCCGCACTCTTGTAATTGTCGAACGGTTT
	>spacer24
	TCACGACTAGTATATTCAGGTACACCGAAT
	>spacer25
	GTAGCAAGACTAAACACAACTGACGTATCT
	>spacer26
	CTCTGAGGACTGAGTAATGGACCAAGTGTTT
MN-BM-A01 (1186347..1188099)	>spacer1
	GCTCCACCAGAGGTAGACATATCAGCACCC	Streptococcus phage vB_SthS_VA460; Streptococcus thermophilus bacteriophage 7201
	>spacer2
	GCCTGATAGTACAAGTCGTACAGCTTGTTA	Streptococcus phage D4276
	>spacer3
	ATGTACTTCGTTAATATTCAATTTTTAAGA	Streptococcus phage vB_SthS_VA460
	>spacer4
	TTACGTGACCCATACATTGAATAGGTCAAT	Streptococcus phages: CHPC926 / TP-778L / 858
	>spacer5
	GTTCTTATGCGTGTTATAAGCTGAAAGTTC
	>spacer6
	CTATTCTGCGTTAGATTTCAAAGTTACCAG
	>spacer7
	AGCCAAGTTGTCTTTTTCGATACAGACCGT
	>spacer8
	ACATATCTAATGACATTCATGTCTGGGTTG	Streptococcus phage P0091
	>spacer9
	TCGGTTTTCGACTTCATAAGTTTCTTGTTC
	>spacer10
	CTTCAATTATTTATTTGTCGTCCAGTGCTT
	>spacer11
	CTTGTTACACACATGTATTTAGATGATTTT	Streptococcus phages: MM25 / L5A1 / C0 / 31B4 / 7A5 / A0 / vB_SthS_VA698 / P9903 / P9902 / P9901 / P9853 / P9852 / P9851 / P7572 / P7571 / P7134 / P7132 / 53 / 73 / Abc2 / 858; Streptococcus thermophilus bacteriophage 2972
	>spacer12
	CTGACCGTTAGGATTTCCATATGCGTCAGG
	>spacer13
	GAGACCTCAGCGTCACCAGAGACCCTAGCG	Streptococcus thermophilus bacteriophages: Sfi18 / Sfi19
	>spacer14
	TCCTTACCTGGCAAGCCATCATTTCCATCG	Streptococcus phage P0091
	>spacer15
	CTGACTGTGAACGGTGTTCAGAAAAACACT	Streptococcus phages: P3684 / D4276
	>spacer16
	TTAGCGCAACCGTTAATTTGACAATTCATA	Streptococcus phages: CHPC926 / CHPC577 / 9874 / 9873 / 9872 / 9871
	>spacer17
	ATACGACAACCATTCAAGAGCATAAACTCG	Streptococcus phage 5093
	>spacer18
	GAGAAACTGAAGAACATTCCTGCTTTAAAT	Streptococcus phage P7602
	>spacer19
	TTCAATGTGGTATTATTAGGGTTTTCACCC	Streptococcus phages: V2 / STP2 / STP1 / R1 / MM25 / M19 / L5A1 / C0 / B5 / B0 / 31B4 / 16B8 / 9B4 / 7A5 / A0 / 7T / vB_SthS_VA698 / P9903 / P9902 / P8922 / P8921 / P7602 / P7154 / P7152 / P7151 / P7134 / P7133 / P7132 / P5652 / P5651 / P5641 / P3681 / 128 / 53 / 73 / Abc2; Streptococcus thermophilus bacteriophage DT1
	>spacer20
	TTTACAAGTGTCCATGAGTAATCGCTAGGA	Streptococcus phages: P9854 / P9852 / P9851 / P5641 / TP-778L / 858; Streptococcus thermophilus bacteriophage 2972
	>spacer21
	TTATTTCCTTCAGCTTTACCTTCAGAGATA
	>spacer22
	TCAGTTGAAAGGCCTTCTGGACCTTTAATA	Streptococcus phages: V2 / R1 / M19 / C0 / 31B4 / 16B8 / 9B4 / 9A / A0 / 7T / vB_SthS_VA460 / vB_SthS_VA214 / P9851 / P7633 / P7601 / P7132 / P5641 / P3684 / P3681 / 128 / 53 / 73
	>spacer23
	TTCCGCACTCTTGTAATTGTCGAACGGTTT
	>spacer24
	TCACGACTAGTATATTCAGGTACACCGAAT
	>spacer25
	GTAGCAAGACTAAACACAACTGACGTATCT
	>spacer26
	CTCTGAGGACTGAGTAATGGACCAAGTGTTT
ASCC 1275 (1558841..1559668)	>spacer1
	TTAGCGCAACCGTTAATTTGACAATTCATA	Streptococcus phages: CHPC926 / CHPC577 / 9874 / 9873 / 9872 / 9871
	>spacer2
	TCTATAATTGTTCTTCCATTCTCTGGGATA	Streptococcus phages: P7152 / P7134 / P0094 / P0093 / P0091 / 9871
	>spacer3
	TCTGCAATCTCTTCGGAAGTATAGTAATAG	Streptococcus phages: TP-778L / TP-J34 / Streptococcus thermophilus bacteriophages: Sfi21 / O1205
	>spacer4
	AATACCGATTACACTATATCTGTTAAAATT
	>spacer5
	GCGCTACGCATTTGACTTTCTTGTGCCTTC	Streptococcus phages: P7574 / P7573
	>spacer6
	CTCTGGATCATATATAGCTACTTTCCCATT	Streptococcus phages: MM25 / 9A / vB_SthS_VA460 / vB_SthS_VA698 / P9854 / P9853 / P9851 / P8922 / P8921 / P7954 / P7953 / P7952 / P7633 / P7632 / P7631 / P7601 / P7573 / P7572 / P7571 / P7154 / P7152 / P7151 / P7133 / P7132 / P5652 / P5651 / P3684 / P3681 / 128 / ALQ13.2; Streptococcus thermophilus bacteriophages: kappa3 / 2972 / Sfi11 / DT1 / SFi18 / Sfi21 / Sfi19 / O1205
	>spacer7
	TCCTTACCTGGCAAGCCATCATTTCCATCG	Streptococcus phage P0091
	>spacer8
	TTAGCGCAACCGTTAATTTGACAATTCATA	Streptococcus phages: CHPC926 / CHPC577 / 9874 / 9873 / 9872 / 9871
	>spacer9
	TCTATAATTGTTCTTCCATTCTCTGGGATA	Streptococcus phages: P7152 / P7134 / P0094 / P0093 / P0091 / 9871
	>spacer10
	ACATTATTAATAAAATGTTTACAAGAGGAA
	>spacer11
	CAAACCAACAACCAAGCTAATACAGCAGTA	Streptococcus phages: vB_SthS_VA460 / 9874
	>spacer12
	TGTCCTCTTCCTCTTTAGCGTTTAGAATTT	Streptococcus thermophilus bacteriophage 7201
MN-BM-A02 (1368586..1369413)	>spacer1
	TTAGCGCAACCGTTAATTTGACAATTCATA	Streptococcus phages: CHPC926 / CHPC577 / 9874 / 9873 / 9872 / 9871
	>spacer2
	TCTATAATTGTTCTTCCATTCTCTGGGATA	Streptococcus phages: P7152 / P7134 / P0094 / P0093 / P0091 / 9871
	>spacer3
	TCTGCAATCTCTTCGGAAGTATAGTAATAG	Streptococcus phages: TP-778L / TP-J34 / Streptococcus thermophilus bacteriophages: Sfi21 / O1205
	>spacer4
	AATACCGATTACACTATATCTGTTAAAATT
	>spacer5
	GCGCTACGCATTTGACTTTCTTGTGCCTTC	Streptococcus phages: P7574 / P7573
	>spacer6
	CTCTGGATCATATATAGCTACTTTCCCATT	Streptococcus phages: MM25 / 9A / vB_SthS_VA460 / vB_SthS_VA698 / P9854 / P9853 / P9851 / P8922 / P8921 / P7954 / P7953 / P7952 / P7633 / P7632 / P7631 / P7601 / P7573 / P7572 / P7571 / P7154 / P7152 / P7151 / P7133 / P7132 / P5652 / P5651 / P3684 / P3681 / 128 / ALQ13.2; Streptococcus thermophilus bacteriophages: kappa3 / 2972 / Sfi11 / DT1 / SFi18 / Sfi21 / Sfi19 / O1205
	>spacer7
	TCCTTACCTGGCAAGCCATCATTTCCATCG	Streptococcus phage P0091
	>spacer8
	TTAGCGCAACCGTTAATTTGACAATTCATA	Streptococcus phages: CHPC926 / CHPC577 / 9874 / 9873 / 9872 / 9871
	>spacer9
	TCTATAATTGTTCTTCCATTCTCTGGGATA	Streptococcus phages: P7152 / P7134 / P0094 / P0093 / P0091 / 9871
	>spacer10
	ACATTATTAATAAAATGTTTACAAGAGGAA
	>spacer11
	CAAACCAACAACCAAGCTAATACAGCAGTA	Streptococcus phages: vB_SthS_VA460 / 9874
	>spacer12
	TGTCCTCTTCCTCTTTAGCGTTTAGAATTT	Streptococcus thermophilus bacteriophage 7201
KLDS SM (683810..684637)	>spacer1
	TTAGCGCAACCGTTAATTTGACAATTCATA	Streptococcus phages: CHPC926 / CHPC577 / 9874 / 9873 / 9872 / 9871
	>spacer2
	TCTATAATTGTTCTTCCATTCTCTGGGATA	Streptococcus phages: P7152 / P7134 / P0094 / P0093 / P0091 / 9871
	>spacer3
	TCTGCAATCTCTTCGGAAGTATAGTAATAG	Streptococcus phages: TP-778L / TP-J34 / Streptococcus thermophilus bacteriophages: Sfi21 / O1205
	>spacer4
	AATACCGATTACACTATATCTGTTAAAATT
	>spacer5
	GCGCTACGCATTTGACTTTCTTGTGCCTTC	Streptococcus phages: P7574 / P7573
	>spacer6
	CTCTGGATCATATATAGCTACTTTCCCATT	Streptococcus phages: MM25 / 9A / vB_SthS_VA460 / vB_SthS_VA698 / P9854 / P9853 / P9851 / P8922 / P8921 / P7954 / P7953 / P7952 / P7633 / P7632 / P7631 / P7601 / P7573 / P7572 / P7571 / P7154 / P7152 / P7151 / P7133 / P7132 / P5652 / P5651 / P3684 / P3681 / 128 / ALQ13.2; Streptococcus thermophilus bacteriophages: kappa3 / 2972 / Sfi11 / DT1 / SFi18 / Sfi21 / Sfi19 / O1205
	>spacer7
	TCCTTACCTGGCAAGCCATCATTTCCATCG	Streptococcus phage P0091
	>spacer8
	TTAGCGCAACCGTTAATTTGACAATTCATA	Streptococcus phages: CHPC926 / CHPC577 / 9874 / 9873 / 9872 / 9871
	>spacer9
	TCTATAATTGTTCTTCCATTCTCTGGGATA	Streptococcus phages: P7152 / P7134 / P0094 / P0093 / P0091 / 9871
	>spacer10
	ACATTATTAATAAAATGTTTACAAGAGGAA
	>spacer11
	CAAACCAACAACCAAGCTAATACAGCAGTA	Streptococcus phages: vB_SthS_VA460 / 9874
	>spacer12
	TGTCCTCTTCCTCTTTAGCGTTTAGAATTT	Streptococcus thermophilus bacteriophage 7201
ND07 (1294523..1295350) (rev_com)	>spacer1
	TTAGCGCAACCGTTAATTTGACAATTCATA	Streptococcus phages: CHPC926 / CHPC577 / 9874 / 9873 / 9872 / 9871
	>spacer2
	TCTATAATTGTTCTTCCATTCTCTGGGATA	Streptococcus phages: P7152 / P7134 / P0094 / P0093 / P0091 / 9871
	>spacer3
	TCTGCAATCTCTTCGGAAGTATAGTAATAG	Streptococcus phages: TP-778L / TP-J34 / Streptococcus thermophilus bacteriophages: Sfi21 / O1205
	>spacer4
	AATACCGATTACACTATATCTGTTAAAATT
	>spacer5
	GCGCTACGCATTTGACTTTCTTGTGCCTTC	Streptococcus phages: P7574 / P7573
	>spacer6
	CTCTGGATCATATATAGCTACTTTCCCATT	Streptococcus phages: MM25 / 9A / vB_SthS_VA460 / vB_SthS_VA698 / P9854 / P9853 / P9851 / P8922 / P8921 / P7954 / P7953 / P7952 / P7633 / P7632 / P7631 / P7601 / P7573 / P7572 / P7571 / P7154 / P7152 / P7151 / P7133 / P7132 / P5652 / P5651 / P3684 / P3681 / 128 / ALQ13.2; Streptococcus thermophilus bacteriophages: kappa3 / 2972 / Sfi11 / DT1 / SFi18 / Sfi21 / Sfi19 / O1205
	>spacer7
	TCCTTACCTGGCAAGCCATCATTTCCATCG	Streptococcus phage P0091
	>spacer8
	TTAGCGCAACCGTTAATTTGACAATTCATA	Streptococcus phages: CHPC926 / CHPC577 / 9874 / 9873 / 9872 / 9871
	>spacer9
	TCTATAATTGTTCTTCCATTCTCTGGGATA	Streptococcus phages: P7152 / P7134 / P0094 / P0093 / P0091 / 9871
	>spacer10
	ACATTATTAATAAAATGTTTACAAGAGGAA
	>spacer11
	CAAACCAACAACCAAGCTAATACAGCAGTA	Streptococcus phages: vB_SthS_VA460 / 9874
	>spacer12
	TGTCCTCTTCCTCTTTAGCGTTTAGAATTT	Streptococcus thermophilus bacteriophage 7201
DGCC 7710 (1371965..1372792)	>spacer1
	TTAGCGCAACCGTTAATTTGACAATTCATA	Streptococcus phages: CHPC926 / CHPC577 / 9874 / 9873 / 9872 / 9871
	>spacer2
	TCTATAATTGTTCTTCCATTCTCTGGGATA	Streptococcus phages: P7152 / P7134 / P0094 / P0093 / P0091 / 9871
	>spacer3
	TCTGCAATCTCTTCGGAAGTATAGTAATAG	Streptococcus phages: TP-778L / TP-J34 / Streptococcus thermophilus bacteriophages: Sfi21 / O1205
	>spacer4
	AATACCGATTACACTATATCTGTTAAAATT
	>spacer5
	GCGCTACGCATTTGACTTTCTTGTGCCTTC	Streptococcus phages: P7574 / P7573
	>spacer6
	CTCTGGATCATATATAGCTACTTTCCCATT	Streptococcus phages: MM25 / 9A / vB_SthS_VA460 / vB_SthS_VA698 / P9854 / P9853 / P9851 / P8922 / P8921 / P7954 / P7953 / P7952 / P7633 / P7632 / P7631 / P7601 / P7573 / P7572 / P7571 / P7154 / P7152 / P7151 / P7133 / P7132 / P5652 / P5651 / P3684 / P3681 / 128 / ALQ13.2; Streptococcus thermophilus bacteriophages: kappa3 / 2972 / Sfi11 / DT1 / SFi18 / Sfi21 / Sfi19 / O1205
	>spacer7
	TCCTTACCTGGCAAGCCATCATTTCCATCG	Streptococcus phage P0091
	>spacer8
	TTAGCGCAACCGTTAATTTGACAATTCATA	Streptococcus phages: CHPC926 / CHPC577 / 9874 / 9873 / 9872 / 9871
	>spacer9
	TCTATAATTGTTCTTCCATTCTCTGGGATA	Streptococcus phages: P7152 / P7134 / P0094 / P0093 / P0091 / 9871
	>spacer10
	ACATTATTAATAAAATGTTTACAAGAGGAA
	>spacer11
	CAAACCAACAACCAAGCTAATACAGCAGTA	Streptococcus phages: vB_SthS_VA460 / 9874
	>spacer12
	TGTCCTCTTCCTCTTTAGCGTTTAGAATTT	Streptococcus thermophilus bacteriophage 7201
GABA (1396122..1397147)	>spacer1
	ACGCCCCCGAAAACGTAACAGGTAGCCCGC
	>spacer2
	ACGGTGCAAGCTTTCTTGGGTACGAATACC	Streptococcus phage D4276
	>spacer3
	ATCTAGTCTCATAAAGTAAAACACTTTCTA
	>spacer4
	TGTCCAATTTGTACTCATGTAATAACACAA
	>spacer5
	GCAATTGAAGACATACAAGATGAAATTGAT	Streptococcus phages: P7955 / P7953 / P7952 / P7951
	>spacer6
	GCTTTGGTTAAAGGGAAATACCTTTGGACT	Streptococcus phage P4761
	>spacer7
	ATCCTTCTCCCTCTTGCTTGAGAGTAATCA
	>spacer8
	CTAAAAGAAACATAGATATTATCAAATTCA
	>spacer9
	CTTTACCCTTAAGCAACATAAAAAACAATG
	>spacer10
	CTGTTTGTGGTATCTAGCCTAAACAGGTTT	Streptococcus phage ALQ13.2
	>spacer11
	TCACCAGTGTCTGTAATGTTGTTTTCATCA	Streptococcus phages: STP2 / STP1
	>spacer12
	AGGCCAAAACCCCACAAATACATAAAAGAG
	>spacer13
	CAATATAAAGCCCCTCATAAAGTCCACCGT
	>spacer14
	TTCTCGACTTTAGTAAGATAATTCCTAACA
	>spacer15
	TACCTGAACTAGATAGCAAAATGGACGTCT
ST3 (1399223..1400777)	>spacer1
	TCTCTGTATAGAGTGTATTTATCGCTGTCCG	Streptococcus phages: 9A / vB_SthS_VA460 / P8922 / P7154 / P5652 / P5651 / P4761 / P0094 / P0093 / CHPC1151 / TP-778L; Streptococcus thermophilus bacteriophage 7201
	>spacer2
	TGTCGCTCATGTGGTTAGCTGTGTCAGATT	Streptococcus phages: P9853 / P9852 / P7572 / P7571 / 858; Streptococcus thermophilus bacteriophage 2972
	>spacer3
	TCTTGGATATTGTGTGGAATGTTAAGCCCG	Streptococcus phages: P9854 / P9851 / 9874
	>spacer4
	TAGTAGCCGCCATCGCCCATGTCAGTGATG	Streptococcus thermophilus bacteriophage 7201
	>spacer5
	TTACTTTCAAGATAATCCTCAACCATTGAG
	>spacer6
	TGAGGGCCTTGTGGTCCTTGAATCCCTTGG
	>spacer7
	AACTATTTAGGGCAAGTTGCCAGGGAGGTA	Streptococcus phage D4276
	>spacer8
	ACACGCTTGACGAAGAAATAAACGCATGGA	Streptococcus phages: P7602 / P7601
	>spacer9
	ACGGTGGCTTTTGAATTTAACAACCTTGAT	Streptococcus thermophilus bacteriophage 7201
	>spacer10
	TTATAACTTTTACATTTATTACACCTAACA	Streptococcus phages: vB_SthS_VA460 / P7632 / P7631
	>spacer11
	ACAGGTTTGTAGGTTATTTCCATAAGCGTC
	>spacer12
	CGGTAATACGCATCCACTGAATCTTAGGGT	Streptococcus phages: M19 / vB_SthS_VA460 / vB_SthS_VA460 / P9902 / P9853 / CHPC577 / 9874 / 9873 / 9872 / 9871 / 858; Streptococcus thermophilus bacteriophage 2972
	>spacer13
	ATTTTTTCGGCTAACTCGACTCTTGTCATT	Streptococcus phage M19
	>spacer14
	TGCTTTAAGACTGGTTTAACAGTAGAACGA	Streptococcus thermophilus bacteriophages: DT1.1 / DT1.4 / MD4 / 7201
	>spacer15
	CGACCATATGAAGACAATGTAACTGTATTA	Streptococcus phages: P7571 / P7132
	>spacer16
	AAACCAAACTGGCAAATTGCCCAAGCAATC
	>spacer17
	CTGAGCTTTCACTAATCGAACCAATCCCAT	Streptococcus phages: P7955 / P7954 / P7953 / P7952 / TP-778L / TP-J34 / ALQ13.2; Streptococcus thermophilus bacteriophage Sfi11
	>spacer18
	AAATAATCGGCTAACTTCTTAGCATTACTT	Streptococcus phages: P0092 / P0091 / CHPC1151 / TP-J34
	>spacer19
	CTTACATCATGGATGTTAAAGGGTGCAAAT	Streptococcus phages: 9A / vB_SthS_VA460 / P9902 / P9854 / P9852 / P9851 / P7152 / P7151 / P5652 / P0095 / 53 / 9874 / Abc2; Streptococcus thermophilus bacteriophages: DT1 / 7201
	>spacer20
	TTAACCATATCAGTATGCATTGAACCAGAT	Streptococcus phages: vB_SthS_VA698 / D4276 / ALQ13.2; Streptococcus thermophilus bacteriophage 7201
	>spacer21
	CGACTTTTGTAGATATGGAAGTTGCGTATA	Streptococcus phages: vB_SthS_VA698 / P7574 / P5641
	>spacer22
	GTAGAACTGTACGACATCATCAAACCTTAG	Streptococcus thermophilus bacteriophages: Sfi21 / Sfi19
	>spacer23
	CTACCACCCCGTGGCATAAATGTGAATTCC	Streptococcus phages: P0094 / P0093 / P0092 / CHPC1151 / 5093
NCTC12958 (1568082..1569571)	>spacer1
	ACCATTCGTTGGTGCTACCGTTCCAGATGT	Streptococcus phage D4276; Streptococcus thermophilus bacteriophage 7201
	>spacer2
	GCTTATGCTAGAAGAACTAGCGAAGAACGT
	>spacer3
	GTTTGGGTATGAGGTTGAGGAAGAAATGAA
	>spacer4
	ATTTCTTTAATATTCCATCTACTACCTGTT
	>spacer5
	ATAAGATTGAAACATACTTGTGCAAGTGTG	Streptococcus phage D4276
	>spacer6
	TTCCAACCGATGAAGTTATTATGACCTATG	Streptococcus phages: P8922 / P7602 / P7601 / P7154 / P7152; Streptococcus thermophilus bacteriophags: Sfi21 / Sfi19
	>spacer7
	TACTTAAGACCATTAAGAGGGTAACTCTTAAG
	>spacer8
	TAATAACCACCGTTTCCGGTATCTGTGATG
	>spacer9
	AATTATTTTGTGGCATATCAAAACTAATAA	Streptococcus phages: D1811 / P8921 / P7633; Streptococcus thermophilus bacteriophage DT2
	>spacer10
	CTTATCTCGAGATACTCAATTCAATTGAAG
	>spacer11
	TTGGGGCAGCCTTGCAAGGCATTGCTAGTG	Streptococcus phages: P4761 / P0095 / P0094 / P0093 / P0092 / 5093
	>spacer12
	AGTTAACCATATCAACAGGAATTCCATTTT	Streptococcus phages: M19 / 53
	>spacer13
	GCCTGATAGTACAAGTCGTACAGCTTGTTA	Streptococcus phage D4276
	>spacer14
	TCCGCTTCATCATTTCTGTTTTTGTTTGGC	Streptococcus phage D4276
	>spacer15
	GGAAGCTACGGACACACAAGTGTGTTAGGT	Streptococcus phages: P7955 / P7951
	>spacer16
	TTCCCTGTGTCTGTGATGTTGACTTCATCA	Streptococcus phages: D5842 / MM25 / vB_SthS_VA698 / P9854 / P9853 / P9852 / P9851 / P7632 / P7631 / P7134 / P7133 / P0094 / P0093 / P0092 / 128; Streptococcus thermophilus bacteriophage 2972
	>spacer17
	ATTCACCCATACTGCCGCTGTGCAGTCGTT	Streptococcus phages: P7951 / P7572 / P7571 / P4761 / TP-778L; Streptococcus thermophilus bacteriophages: Sfi11 / O1205
	>spacer18
	CTGACCGTTAGGATTTCCATATGCGTCAGG
	>spacer19
	TTATTTTCTCTGGACTGTTGAAGTCTTTCT	Streptococcus thermophilus bacteriophage Sfi21
	>spacer20
	AAAAGAAAGCTCGTAAAATCGTTGAATTAA
	>spacer21
	ATGCTATTCGGATTCGGTATCTCAACTGTG	Streptococcus phages: vB_SthS_VA214 / P0095
	>spacer22
	GCCACGTCAAGAGTGCCAAACTCACGTATT	Streptococcus phages: P7953 / P7955 / P7952
Spacers of CRISPR4
Strain (coordinates of CRISPR array)	spacers	1st blastn result (excluding same species)
ASCC 1275 (1144778..1145540)	>spacer1
	TGTTCCCATTGAGCCAATGCCAAACACACGACCA	Streptococcus phages: P7954 / P7953 / P7952
	>spacer2
	TTTGAAAGGGGTTAAGGGTAAGGAAGTTGAGTAT
	>spacer3
	GTGGCACACCTACCTTGAATACTCAACCAGTACA	Streptococcus phages: 9A / P8922 / P7632 / P7631 / P7154 / P7152 / P7151 / P5652 / P5651 / 128; Streptococcus thermophilus bacteriophage 7201
	>spacer4
	TTCTGTTCTTCTTGATGCTTGTCGAGGCGCTGA	Streptococcus phages: P4761 / TP-778L / TP-J34; Streptococcus thermophilus bacteriophage DT1
	>spacer5
	CAATGTTCTCAGCTGGAAATGAGGTAATGTATA	Streptococcus thermophilus bacteriophages: MD2 / Sfi21 / Sfi19
	>spacer6
	CAACGTTCCAACATTGTCGGCAATTTTACCTTG	Streptococcus thermophilus bacteriophages: Sfi21 / Sfi19
	>spacer7
	ATATTGTTAATGATAACTACAAATTTAAACGAG	Streptococcus phages: P7953 / V2 / STP2 / R1 / L5A1 / C0 / B5 / B0 / 31B4 / 9B4 / A0 / 7T / vB_SthS_VA214 / vB_SthS_VA698 / P8921 / P7951 / P7152 / P7132 / P5651 / P3681; Streptococcus thermophilus bacteriophages: Sfi11 / Sfi21 / Sfi19 / O1205
	>spacer8
	CAAACGACAAAGGTCTATCAGCCTTGTAAGGGT	Streptococcus phage ALQ13.2
	>spacer9
	CAGAAGAATCTGATCTATTCGCCGATAATACAG	Streptococcus phages: P7572 / P7571
	>spacer10
	TAGTACTGTTCCCATGTCTAAGGAGGGGTTGCG	Streptococcus phage TP-778L
	>spacer11
	CTGGGGGCGCTCAGACTCGCCCTAGTGGTGTCG
	>spacer12
	GCTTATGCGTGGGAGGCCATTGATATAGGTATA	Streptococcus phages: 9A / P8922 / P8921 / P7953 / P7633 / P7601 / P7154 / P7152 / P7151 / P5652 / P0095 / ALQ13.2
MN-BM-A02 (954527..955289)	>spacer1
	TGTTCCCATTGAGCCAATGCCAAACACACGACCA	Streptococcus phages: P7954 / P7953 / P7952
	>spacer2
	TTTGAAAGGGGTTAAGGGTAAGGAAGTTGAGTAT
	>spacer3
	GTGGCACACCTACCTTGAATACTCAACCAGTACA	Streptococcus phages: 9A / P8922 / P7632 / P7631 / P7154 / P7152 / P7151 / P5652 / P5651 / 128; Streptococcus thermophilus bacteriophage 7201
	>spacer4
	TTCTGTTCTTCTTGATGCTTGTCGAGGCGCTGA	Streptococcus phages: P4761 / TP-778L / TP-J34; Streptococcus thermophilus bacteriophage DT1
	>spacer5
	CAATGTTCTCAGCTGGAAATGAGGTAATGTATA	Streptococcus thermophilus bacteriophages: MD2 / Sfi21 / Sfi19
	>spacer6
	CAACGTTCCAACATTGTCGGCAATTTTACCTTG	Streptococcus thermophilus bacteriophages: Sfi21 / Sfi19
	>spacer7
	ATATTGTTAATGATAACTACAAATTTAAACGAG	Streptococcus phages: P7953 / V2 / STP2 / R1 / L5A1 / C0 / B5 / B0 / 31B4 / 9B4 / A0 / 7T / vB_SthS_VA214 / vB_SthS_VA698 / P8921 / P7951 / P7152 / P7132 / P5651 / P3681; Streptococcus thermophilus bacteriophages: Sfi11 / Sfi21 / Sfi19 / O1205
	>spacer8
	CAAACGACAAAGGTCTATCAGCCTTGTAAGGGT	Streptococcus phage ALQ13.2
	>spacer9
	CAGAAGAATCTGATCTATTCGCCGATAATACAG	Streptococcus phages: P7572 / P7571
	>spacer10
	TAGTACTGTTCCCATGTCTAAGGAGGGGTTGCG	Streptococcus phage TP-778L
	>spacer11
	CTGGGGGCGCTCAGACTCGCCCTAGTGGTGTCG
	>spacer12
	GCTTATGCGTGGGAGGCCATTGATATAGGTATA	Streptococcus phages: 9A / P8922 / P8921 / P7953 / P7633 / P7601 / P7154 / P7152 / P7151 / P5652 / P0095 / ALQ13.2
KLDS SM (269742..270504)	>spacer1
	TGTTCCCATTGAGCCAATGCCAAACACACGACCA	Streptococcus phages: P7954 / P7953 / P7952
	>spacer2
	TTTGAAAGGGGTTAAGGGTAAGGAAGTTGAGTAT
	>spacer3
	GTGGCACACCTACCTTGAATACTCAACCAGTACA	Streptococcus phages: 9A / P8922 / P7632 / P7631 / P7154 / P7152 / P7151 / P5652 / P5651 / 128; Streptococcus thermophilus bacteriophage 7201
	>spacer4
	TTCTGTTCTTCTTGATGCTTGTCGAGGCGCTGA	Streptococcus phages: P4761 / TP-778L / TP-J34; Streptococcus thermophilus bacteriophage DT1
	>spacer5
	CAATGTTCTCAGCTGGAAATGAGGTAATGTATA	Streptococcus thermophilus bacteriophages: MD2 / Sfi21 / Sfi19
	>spacer6
	CAACGTTCCAACATTGTCGGCAATTTTACCTTG	Streptococcus thermophilus bacteriophages: Sfi21 / Sfi19
	>spacer7
	ATATTGTTAATGATAACTACAAATTTAAACGAG	Streptococcus phages: P7953 / V2 / STP2 / R1 / L5A1 / C0 / B5 / B0 / 31B4 / 9B4 / A0 / 7T / vB_SthS_VA214 / vB_SthS_VA698 / P8921 / P7951 / P7152 / P7132 / P5651 / P3681; Streptococcus thermophilus bacteriophages: Sfi11 / Sfi21 / Sfi19 / O1205
	>spacer8
	CAAACGACAAAGGTCTATCAGCCTTGTAAGGGT	Streptococcus phage ALQ13.2
	>spacer9
	CAGAAGAATCTGATCTATTCGCCGATAATACAG	Streptococcus phages: P7572 / P7571
	>spacer10
	TAGTACTGTTCCCATGTCTAAGGAGGGGTTGCG	Streptococcus phage TP-778L
	>spacer11
	CTGGGGGCGCTCAGACTCGCCCTAGTGGTGTCG
	>spacer12
	GCTTATGCGTGGGAGGCCATTGATATAGGTATA	Streptococcus phages: 9A / P8922 / P8921 / P7953 / P7633 / P7601 / P7154 / P7152 / P7151 / P5652 / P0095 / ALQ13.2
ND07 (1708655..1709417) (rev_com)	>spacer1
	TGTTCCCATTGAGCCAATGCCAAACACACGACCA	Streptococcus phages: P7954 / P7953 / P7952
	>spacer2
	TTTGAAAGGGGTTAAGGGTAAGGAAGTTGAGTAT
	>spacer3
	GTGGCACACCTACCTTGAATACTCAACCAGTACA	Streptococcus phages: 9A / P8922 / P7632 / P7631 / P7154 / P7152 / P7151 / P5652 / P5651 / 128; Streptococcus thermophilus bacteriophage 7201
	>spacer4
	TTCTGTTCTTCTTGATGCTTGTCGAGGCGCTGA	Streptococcus phages: P4761 / TP-778L / TP-J34; Streptococcus thermophilus bacteriophage DT1
	>spacer5
	CAATGTTCTCAGCTGGAAATGAGGTAATGTATA	Streptococcus thermophilus bacteriophages: MD2 / Sfi21 / Sfi19
	>spacer6
	CAACGTTCCAACATTGTCGGCAATTTTACCTTG	Streptococcus thermophilus bacteriophages: Sfi21 / Sfi19
	>spacer7
	ATATTGTTAATGATAACTACAAATTTAAACGAG	Streptococcus phages: P7953 / V2 / STP2 / R1 / L5A1 / C0 / B5 / B0 / 31B4 / 9B4 / A0 / 7T / vB_SthS_VA214 / vB_SthS_VA698 / P8921 / P7951 / P7152 / P7132 / P5651 / P3681; Streptococcus thermophilus bacteriophages: Sfi11 / Sfi21 / Sfi19 / O1205
	>spacer8
	CAAACGACAAAGGTCTATCAGCCTTGTAAGGGT	Streptococcus phage ALQ13.2
	>spacer9
	CAGAAGAATCTGATCTATTCGCCGATAATACAG	Streptococcus phages: P7572 / P7571
	>spacer10
	TAGTACTGTTCCCATGTCTAAGGAGGGGTTGCG	Streptococcus phage TP-778L
	>spacer11
	CTGGGGGCGCTCAGACTCGCCCTAGTGGTGTCG
	>spacer12
	GCTTATGCGTGGGAGGCCATTGATATAGGTATA	Streptococcus phages: 9A / P8922 / P8921 / P7953 / P7633 / P7601 / P7154 / P7152 / P7151 / P5652 / P0095 / ALQ13.2
DGCC 7710 (957897..958659)	>spacer1
	TGTTCCCATTGAGCCAATGCCAAACACACGACCA	Streptococcus phages: P7954 / P7953 / P7952
	>spacer2
	TTTGAAAGGGGTTAAGGGTAAGGAAGTTGAGTAT
	>spacer3
	GTGGCACACCTACCTTGAATACTCAACCAGTACA	Streptococcus phages: 9A / P8922 / P7632 / P7631 / P7154 / P7152 / P7151 / P5652 / P5651 / 128; Streptococcus thermophilus bacteriophage 7201
	>spacer4
	TTCTGTTCTTCTTGATGCTTGTCGAGGCGCTGA	Streptococcus phages: P4761 / TP-778L / TP-J34; Streptococcus thermophilus bacteriophage DT1
	>spacer5
	CAATGTTCTCAGCTGGAAATGAGGTAATGTATA	Streptococcus thermophilus bacteriophages: MD2 / Sfi21 / Sfi19
	>spacer6
	CAACGTTCCAACATTGTCGGCAATTTTACCTTG	Streptococcus thermophilus bacteriophages: Sfi21 / Sfi19
	>spacer7
	ATATTGTTAATGATAACTACAAATTTAAACGAG	Streptococcus phages: P7953 / V2 / STP2 / R1 / L5A1 / C0 / B5 / B0 / 31B4 / 9B4 / A0 / 7T / vB_SthS_VA214 / vB_SthS_VA698 / P8921 / P7951 / P7152 / P7132 / P5651 / P3681; Streptococcus thermophilus bacteriophages: Sfi11 / Sfi21 / Sfi19 / O1205
	>spacer8
	CAAACGACAAAGGTCTATCAGCCTTGTAAGGGT	Streptococcus phage ALQ13.2
	>spacer9
	CAGAAGAATCTGATCTATTCGCCGATAATACAG	Streptococcus phages: P7572 / P7571
	>spacer10
	TAGTACTGTTCCCATGTCTAAGGAGGGGTTGCG	Streptococcus phage TP-778L
	>spacer11
	CTGGGGGCGCTCAGACTCGCCCTAGTGGTGTCG
	>spacer12
	GCTTATGCGTGGGAGGCCATTGATATAGGTATA	Streptococcus phages: 9A / P8922 / P8921 / P7953 / P7633 / P7601 / P7154 / P7152 / P7151 / P5652 / P0095 / ALQ13.2
B59671 (295226..295498)	>spacer1
	GCTTTTCGTTTAGCATCACTAACGCTTAATCCA	Streptococcus phages: ALQ13.2 / P9853 / P9852 / P7955 / P7954 / P7953 / P7952 / TP-J34 / 858; Streptococcus thermophilus bacteriophages: 2972 / O1205
	>spacer2
	CAATCCTGATTACGACTTATACGATAGAAGCCA	Streptococcus phages: P7152 / P7132
	>spacer3
[truncated: 19 more rows]
