# Supplementary material for: Comparative Genomics of Streptococcus thermophilus Support Important Traits Concerning the Evolution, Biology and Technological Properties of the Species
Source: Front Microbiol. 2019 Dec 20;10:2916. doi: 10.3389/fmicb.2019.02916 (PMC6951406; doi:10.3389/fmicb.2019.02916)
Supplement: Supplementary file 13 [file Table_13.XLSX]

## Sheet: TABLE S13
Supplementary Table S13. Genes involved in protocooperation with L. bulgaricus identified in the 23 S. thermophilus strains. Genes highlighted in red correspond to putative pseudogenes
product	gene	ACA-DC 2	APC151	ASCC 1275	B59671	CNRZ1066	CS8	DGCC 7710	EPS	GABA	JIM 8232	KLDS 3.1003	KLDS SM	LMD-9	LMG 18311	MN-BM-A01	MN-BM-A02	MN-ZLW-002	NCTC12958	ND03	ND07	S9	SMQ-301	ST3
Pyruvate formate lyase	pflB	STACADC2_RS07510	B1761_RS03780	T303_RS08960	CG712_RS04300	STR_RS07795	BAY21_RS06575	CW339_RS07980	CR922_RS01555	CR921_RS08085	STH8232_RS08225	BEN15_RS01340	A9497_RS04170	STER_RS07960	STU_RS17145	AMD33_RS06860	MNA02_RS07865	Y1U_RS07880	DQL34_RS09110	STND_RS07870	BBD27_RS06175	AVT04_RS06735	SMQ301_RS07945	BGL51_RS08180
Pyruvate formate lyase activating enzyme	pflA	STACADC2_RS07420	B1761_RS03690	T303_RS08875	CG712_RS04210	STR_RS07710	BAY21_RS06660	CW339_RS07890	CR922_RS01645	CR921_RS07995	STH8232_RS08140	BEN15_RS01250	A9497_RS04085	STER_RS07875	STU_RS17060	AMD33_RS06775	MNA02_RS07780	Y1U_RS07795	DQL34_RS09020	STND_RS07785	BBD27_RS06260	AVT04_RS06820	SMQ301_RS07860	BGL51_RS08085
DNA starvation/stationary phase protection protein	dpr	STACADC2_RS03600	B1761_RS09365	T303_RS04775	CG712_RS00215	STR_RS03680	BAY21_RS01240	CW339_RS03730	CR922_RS05755	CR921_RS03735	STH8232_RS04025	BEN15_RS06955	A9497_RS00040	STER_RS03760	STU_RS13100	AMD33_RS02580	MNA02_RS03690	Y1U_RS03620	DQL34_RS04645	STND_RS03670	BBD27_RS00635	AVT04_RS01315	SMQ301_RS03755	BGL51_RS03760
transcriptional repressor	fur	STACADC2_RS03605	B1761_RS09370	T303_RS04780	CG712_RS00220	STR_RS03685	BAY21_RS01235	CW339_RS03735	CR922_RS05750	CR921_RS03740	STH8232_RS04030	BEN15_RS06960	A9497_RS00045	STER_RS03765	STU_RS13105	AMD33_RS02585	MNA02_RS03695	Y1U_RS03625	DQL34_RS04660	STND_RS03675	BBD27_RS00630	AVT04_RS01310	SMQ301_RS03760	BGL51_RS03765
Ferrichrome ABC transporter, substrate-binding protein	fatB	STACADC2_RS04830	-	T303_RS06060	CG712_RS01395	STR_RS04980	BAY21_RS09380	CW339_RS05035	CR922_RS04440	CR921_RS05070	-	BEN15_RS08240	A9497_RS01295	STER_RS05060	STU_RS14335	-	MNA02_RS04970	-	-	-	BBD27_RS09055	AVT04_RS00065	SMQ301_RS05040	-
Ferrichrome ABC transporter, ATP-binding protein	fatA	STACADC2_RS04835	-	T303_RS06065	CG712_RS01400	STR_RS04985	BAY21_RS09375	CW339_RS05040	CR922_RS04435	CR921_RS05075	-	BEN15_RS08245	A9497_RS01300	STER_RS05065	STU_RS14340	-	MNA02_RS04975	-	-	-	BBD27_RS09050	AVT04_RS00060	SMQ301_RS05045	-
Ferrichrome ABC transporter, permease protein	fatC	STACADC2_RS04840	-	T303_RS06070	CG712_RS01405	STR_RS04990	BAY21_RS09370	CW339_RS05045	CR922_RS04430	CR921_RS05080	-	BEN15_RS08250	A9497_RS01305	STER_RS05070	STU_RS14345	-	MNA02_RS04980	-	-	-	BBD27_RS09045	AVT04_RS00055	SMQ301_RS05050	-
Ferrichrome ABC transporter, permease protein	fatD	STACADC2_RS04845	-	T303_RS06075	CG712_RS01410	STR_RS04995	BAY21_RS09365	CW339_RS05050	CR922_RS04425	CR921_RS05085	-	BEN15_RS08255	A9497_RS01310	STER_RS05075	STU_RS14350	-	MNA02_RS04985	-	-	-	BBD27_RS09040	AVT04_RS00050	SMQ301_RS05055	-
Glutathione biosynthesis bifunctional protein gshB	gshF	STACADC2_RS06365	B1761_RS02595	T303_RS07800	CG712_RS03155	STR_RS06640	BAY21_RS07720	CW339_RS06815	CR922_RS02750	CR921_RS06875	STH8232_RS07060	BEN15_RS00060	A9497_RS03015	STER_RS06790	STU_RS15985	AMD33_RS05710	MNA02_RS06705	Y1U_RS06725	DQL34_RS07820	STND_RS06685	BBD27_RS07330	AVT04_RS07885	SMQ301_RS06775	BGL51_RS06985
